# Supplementary material for: Secondary Metabolites with α-Glucosidase Inhibitory Activity from Mangrove Endophytic Fungus Talaromyces sp. CY-3
Source: MDPI journal article supplement (doi:10.3390/md19090492), 2021-08-28
Supplement: s1 [file s1]

# Secondary Metabolites with $\alpha$ -Glucosidase Inhibitory Activity from Mangrove Endophytic Fungus *Talaromyces* sp. CY-3

Wencong Yang<sup>a</sup>, Qi Tan<sup>a</sup>, Yihao Yin<sup>a</sup>, Yan Chen<sup>a,b</sup>, Yi Zhang<sup>c</sup>, Jianying Wu<sup>a</sup>, Leyao Gao<sup>a</sup>, Bo Wang<sup>a,\*</sup>, Zhigang She<sup>a,\*</sup>

<sup>a</sup> School of Chemistry, Sun Yat-Sen University, Guangzhou, 510275, P.R.China, e-mail:ceswb@mail.sysu.edu.cn (Bo Wang); cesszhzg@mail.sysu.edu.cn (Zhigang She)

<sup>b</sup> National R & D Center for Edible Fungus Processing Technology, Henan University, Kaifeng, 475004, P.R.China

<sup>c</sup> Research Institute for Marine Drugs and Nutrition, College of Food Science and Technology, Guangdong Ocean University, Zhanjiang 524088, P.R.China

## ABSTRACT

Eight new compounds including two sambutoxin derivatives (**1–2**), two highly oxygenated cyclopentenones (**7–8**), four highly oxygenated cyclohexenones (**9–12**), together with four known sambutoxin derivatives (**3–6**), were isolated from semi-mangrove endophytic fungus *Talaromyces* sp. CY-3, under the guidance of molecular networking. The structures of new isolates were elucidated by analysis of the detailed spectroscopic data, ECD spectra, chemical hydrolysis, <sup>13</sup>C NMR calculation and DP4+ analysis. In bioassays, Compounds **1–5** displayed better  $\alpha$ -glucosidase inhibitory activity than the positive control 1-deoxynojirimycin ( $IC_{50}=80.8\pm0.3\text{ }\mu\text{M}$ ), the  $IC_{50}$  value were in the range of  $12.6\pm0.9$  to  $57.3\pm1.3\text{ }\mu\text{M}$ .

**Keywords** *Talaromyces* sp.; molecular networking; sambutoxin; polyketides;  $\alpha$ -glucosidase;

## Contents

|                                                                                          |    |
|------------------------------------------------------------------------------------------|----|
| <b>Figure S1</b> LC-MS/MS of CY-3.....                                                   | 6  |
| <b>Figure S2</b> $^1\text{H}$ NMR of <b>1</b> .....                                      | 6  |
| <b>Figure S3</b> $^{13}\text{C}$ NMR of <b>1</b> .....                                   | 7  |
| <b>Figure S4</b> DEPT 135 of <b>1</b> .....                                              | 7  |
| <b>Figure S5</b> HSQC spectrum of <b>1</b> .....                                         | 8  |
| <b>Figure S6</b> HMBC spectrum of <b>1</b> .....                                         | 8  |
| <b>Figure S7</b> COSY spectrum of <b>1</b> .....                                         | 9  |
| <b>Figure S8</b> NOESY spectrum of <b>1</b> .....                                        | 9  |
| <b>Figure S9</b> HR-ESI-MS spectrum of <b>1</b> .....                                    | 10 |
| <b>Figure S10</b> UV spectrum of <b>1</b> and ECD spectra of <b>1</b> and <b>3</b> ..... | 10 |
| <b>Figure S11</b> $^1\text{H}$ NMR of <b>2</b> .....                                     | 11 |
| <b>Figure S12</b> $^{13}\text{C}$ NMR of <b>2</b> .....                                  | 11 |
| <b>Figure S13</b> DEPT 135 of <b>2</b> .....                                             | 12 |
| <b>Figure S14</b> HSQC spectrum of <b>2</b> .....                                        | 12 |
| <b>Figure S15</b> HMBC spectrum of <b>2</b> .....                                        | 13 |
| <b>Figure S16</b> COSY spectrum of <b>2</b> .....                                        | 13 |
| <b>Figure S17</b> NOESY spectrum of <b>2</b> .....                                       | 14 |
| <b>Figure S18</b> HR-ESI-MS spectrum of <b>2</b> .....                                   | 14 |
| <b>Figure S19</b> UV spectrum of <b>2</b> .....                                          | 15 |
| <b>Figure S20</b> $^1\text{H}$ NMR of <b>7</b> .....                                     | 15 |
| <b>Figure S21</b> $^{13}\text{C}$ NMR of <b>7</b> .....                                  | 16 |
| <b>Figure S22</b> HSQC spectrum of <b>7</b> .....                                        | 16 |
| <b>Figure S23</b> HMBC spectrum of <b>7</b> .....                                        | 17 |
| <b>Figure S24</b> COSY spectrum of <b>7</b> .....                                        | 17 |
| <b>Figure S25</b> NOESY spectrum of <b>7</b> .....                                       | 18 |
| <b>Figure S26</b> HR-ESI-MS spectrum of <b>7</b> .....                                   | 18 |
| <b>Figure S27</b> UV spectrum of <b>7</b> .....                                          | 19 |
| <b>Figure S28</b> $^1\text{H}$ NMR of <b>8</b> .....                                     | 19 |
| <b>Figure S29</b> $^{13}\text{C}$ NMR of <b>8</b> .....                                  | 20 |

|                                                          |    |
|----------------------------------------------------------|----|
| <b>Figure S30</b> HSQC spectrum of <b>8</b> .....        | 20 |
| <b>Figure S31</b> HMBC spectrum of <b>8</b> .....        | 21 |
| <b>Figure S32</b> COSY spectrum of <b>8</b> .....        | 21 |
| <b>Figure S33</b> NOESY spectrum of <b>8</b> .....       | 22 |
| <b>Figure S34</b> HR-ESI-MS spectrum of <b>8</b> .....   | 22 |
| <b>Figure S35</b> UV spectrum of <b>8</b> .....          | 23 |
| <b>Figure S36</b> $^1\text{H}$ NMR of <b>9</b> .....     | 23 |
| <b>Figure S37</b> $^{13}\text{C}$ NMR of <b>9</b> .....  | 24 |
| <b>Figure S38</b> HSQC spectrum of <b>9</b> .....        | 24 |
| <b>Figure S39</b> HMBC spectrum of <b>9</b> .....        | 25 |
| <b>Figure S40</b> COSY spectrum of <b>9</b> .....        | 25 |
| <b>Figure S41</b> NOESY spectrum of <b>9</b> .....       | 26 |
| <b>Figure S42</b> HR-ESI-MS spectrum of <b>9</b> .....   | 26 |
| <b>Figure S43</b> UV spectrum of <b>9</b> .....          | 27 |
| <b>Figure S44</b> $^1\text{H}$ NMR of <b>10</b> .....    | 27 |
| <b>Figure S45</b> $^{13}\text{C}$ NMR of <b>10</b> ..... | 28 |
| <b>Figure S46</b> HSQC spectrum of <b>10</b> .....       | 28 |
| <b>Figure S47</b> HMBC spectrum of <b>10</b> .....       | 29 |
| <b>Figure S48</b> COSY spectrum of <b>10</b> .....       | 29 |
| <b>Figure S49</b> NOESY spectrum of <b>10</b> .....      | 30 |
| <b>Figure S50</b> HR-ESI-MS spectrum of <b>10</b> .....  | 30 |
| <b>Figure S51</b> UV spectrum of <b>10</b> .....         | 31 |
| <b>Figure S52</b> $^1\text{H}$ NMR of <b>11</b> .....    | 31 |
| <b>Figure S53</b> $^{13}\text{C}$ NMR of <b>11</b> ..... | 32 |
| <b>Figure S54</b> HSQC spectrum of <b>11</b> .....       | 32 |
| <b>Figure S55</b> HMBC spectrum of <b>11</b> .....       | 33 |
| <b>Figure S56</b> COSY spectrum of <b>11</b> .....       | 33 |
| <b>Figure S57</b> NOESY spectrum of <b>11</b> .....      | 34 |
| <b>Figure S58</b> HR-ESI-MS spectrum of <b>11</b> .....  | 34 |
| <b>Figure S59</b> UV of <b>11</b> .....                  | 35 |

|                                                                                                                                                                                                                                                                                                                                                          |    |
|----------------------------------------------------------------------------------------------------------------------------------------------------------------------------------------------------------------------------------------------------------------------------------------------------------------------------------------------------------|----|
| <b>Figure S60</b> $^1\text{H}$ NMR of <b>12</b> .....                                                                                                                                                                                                                                                                                                    | 35 |
| <b>Figure S61</b> $^{13}\text{C}$ NMR of <b>12</b> .....                                                                                                                                                                                                                                                                                                 | 36 |
| <b>Figure S62</b> HSQC spectrum of <b>12</b> .....                                                                                                                                                                                                                                                                                                       | 36 |
| <b>Figure S63</b> HMBC spectrum of <b>12</b> .....                                                                                                                                                                                                                                                                                                       | 37 |
| <b>Figure S64</b> COSY spectrum of <b>12</b> .....                                                                                                                                                                                                                                                                                                       | 37 |
| <b>Figure S65</b> NOESY spectrum of <b>12</b> .....                                                                                                                                                                                                                                                                                                      | 38 |
| <b>Figure S66</b> HR-ESI-MS spectrum of <b>12</b> .....                                                                                                                                                                                                                                                                                                  | 38 |
| <b>Figure S67</b> UV spectrum of <b>12</b> .....                                                                                                                                                                                                                                                                                                         | 39 |
| <b>Figure S68</b> Comparison of the experimental $^{13}\text{C}$ NMR data and mean absolute error of the 2,4,6-trimethyloct-2-ene side chain for compound <b>1</b> and the calculated chemical shifts for four 2,4,6-trimethyloct-2-ene side chain diastereomers ( <i>14R,16S-1</i> , <i>14R,16R-1</i> <i>14S,16R-1</i> , and <i>14S, 16S-1</i> ). ..... | 39 |
| <b>Figure S69</b> DP4+ analysis of <b>1</b> . .....                                                                                                                                                                                                                                                                                                      | 40 |
| <b>Figure S70</b> Comparison of the experimental $^{13}\text{C}$ NMR data and mean absolute error of the 2,4,6-trimethyloct-2-ene side chain for compound <b>2</b> and the calculated chemical shifts for four 2,4,6-trimethyloct-2-ene side chain diastereomers ( <i>14R,16S-2</i> , <i>14R,16R-2</i> <i>14S,16R-2</i> , and <i>14S, 16S-2</i> ). ..... | 40 |
| <b>Figure S71</b> DP4+ analysis of <b>2</b> . .....                                                                                                                                                                                                                                                                                                      | 41 |
| <b>Figure S72</b> Hydrolysis of <b>7</b> and <b>9</b> compared with the standard through HPLC chiral column. ....                                                                                                                                                                                                                                        | 41 |
| <b>Table S1</b> Gibbs free energies and Boltzmann-population of low-energy conformers of <i>7S</i> , <i>10R</i> , <i>11R</i> , <i>13E</i> , <i>14R</i> , <i>16S -1</i> . ....                                                                                                                                                                            | 41 |
| <b>Table S2</b> Cartesian coordinates for the low-energy optimized conformers of <i>7S</i> , <i>10R</i> , <i>11R</i> , <i>13E</i> , <i>14R</i> , <i>16S -1</i> at B3LYP/6-31+G (d, p) level of theory in MeOH.....                                                                                                                                       | 42 |
| <b>Table S3</b> Gibbs free energies and Boltzmann-population of low-energy conformers of <i>7S</i> , <i>11R</i> , <i>13E</i> , <i>14R</i> , <i>16S -2</i> . ....                                                                                                                                                                                         | 55 |
| <b>Table S4</b> Cartesian coordinates for the low-energy optimized conformers of <i>7S</i> , <i>11R</i> , <i>13E</i> , <i>14R</i> , <i>16S -2</i> at B3LYP/6-31+G (d, p) level of theory in MeOH.....                                                                                                                                                    | 55 |
| <b>Table S5</b> Gibbs free energies and Boltzmann-population of low-energy conformers of <i>2R</i> , <i>3R -7</i> . ....                                                                                                                                                                                                                                 | 73 |

|                                                                                                                                                                                                                           |     |
|---------------------------------------------------------------------------------------------------------------------------------------------------------------------------------------------------------------------------|-----|
| <b>Table S6</b> Cartesian coordinates for the low-energy optimized conformers of 2 <i>R</i> , 3 <i>R</i> -7 at B3LYP/6-31+G (d, p) level of theory in MeOH.....                                                           | 74  |
| <b>Table S7</b> Gibbs free energies and Boltzmann-population of low-energy conformers of 2 <i>S</i> , 3 <i>R</i> -7. ....                                                                                                 | 84  |
| <b>Table S8</b> Cartesian coordinates for the low-energy optimized conformers of 2 <i>S</i> , 3 <i>R</i> -7 at B3LYP/6-31+G (d, p) level of theory in MeOH. ....                                                          | 85  |
| <b>Table S9</b> Gibbs free energies and Boltzmann-population of low-energy conformers of 2 <i>S</i> , 3 <i>S</i> -8. ....                                                                                                 | 95  |
| <b>Table S10</b> Cartesian coordinates for the low-energy optimized conformers of 2 <i>S</i> , 3 <i>S</i> -8 at B3LYP/6-31+G (d, p) level of theory in MeOH.....                                                          | 95  |
| <b>Table S11</b> Gibbs free energies and Boltzmann-population of low-energy conformers of 2 <i>S</i> , 3 <i>R</i> -8. ....                                                                                                | 99  |
| <b>Table S12</b> Cartesian coordinates for the low-energy optimized conformers of 2 <i>S</i> , 3 <i>R</i> -8 at B3LYP/6-31+G (d, p) level of theory in MeOH.....                                                          | 99  |
| <b>Table S13</b> Gibbs free energies and Boltzmann-population of low-energy conformers of 2 <i>R</i> , 3 <i>R</i> -9. ....                                                                                                | 100 |
| <b>Table S14</b> Cartesian coordinates for the low-energy optimized conformers of 2 <i>R</i> , 3 <i>R</i> -9 at B3LYP/6-31+G (d, p) level of theory in MeOH.....                                                          | 101 |
| <b>Table S15</b> Gibbs free energies and Boltzmann-population of low-energy conformers of 2 <i>S</i> , 3 <i>R</i> , 4 <i>R</i> -10. ....                                                                                  | 113 |
| <b>Table S16</b> Cartesian coordinates for the low-energy optimized conformers of 2 <i>S</i> , 3 <i>R</i> , 4 <i>R</i> -10 at B3LYP/6-31+G (d, p) level of theory in MeOH.....                                            | 113 |
| <b>Table S17</b> Gibbs free energies and Boltzmann-population of low-energy conformers of 2 <i>R</i> , 3 <i>R</i> , 4 <i>R</i> -11. ....                                                                                  | 115 |
| <b>Table S18</b> Cartesian coordinates for the low-energy optimized conformers of 7 <i>S</i> , 10 <i>R</i> , 11 <i>R</i> , 13 <i>E</i> , 14 <i>R</i> , 16 <i>S</i> -1 at B3LYP/6-31+G (d, p) level of theory in MeOH..... | 115 |
| <b>Table S19</b> Gibbs free energies and Boltzmann-population of low-energy conformers of 2 <i>R</i> , 3 <i>R</i> , 4 <i>R</i> -12.. ....                                                                                 | 117 |
| <b>Table S20</b> Cartesian coordinates for the low-energy optimized conformers of 2 <i>R</i> , 3 <i>R</i> , 4 <i>R</i> -12 at B3LYP/6-31+G (d, p) level of theory in MeOH.....                                            | 117 |

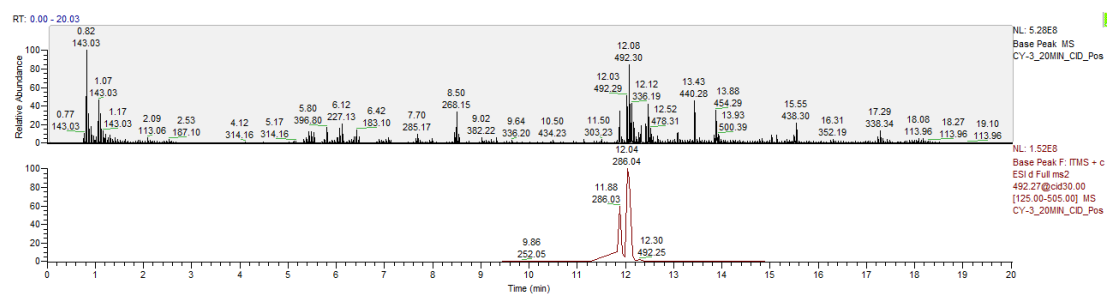

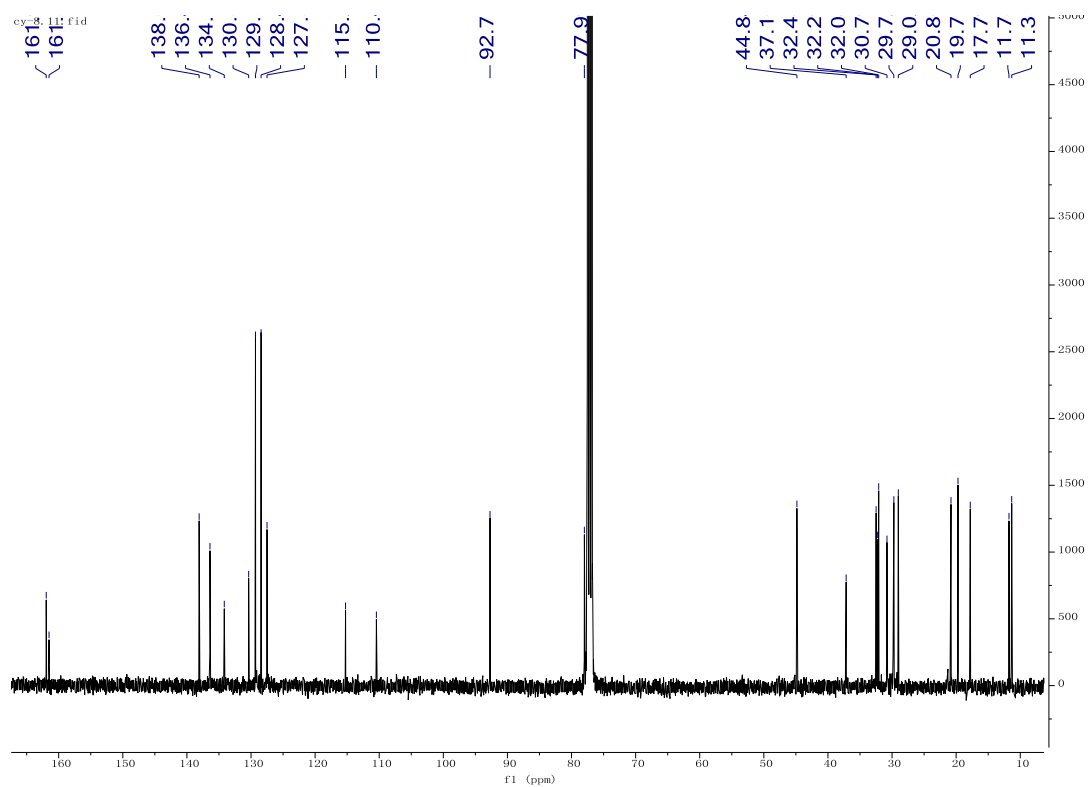

**Figure S3**  $^{13}\text{C}$  NMR of **1**

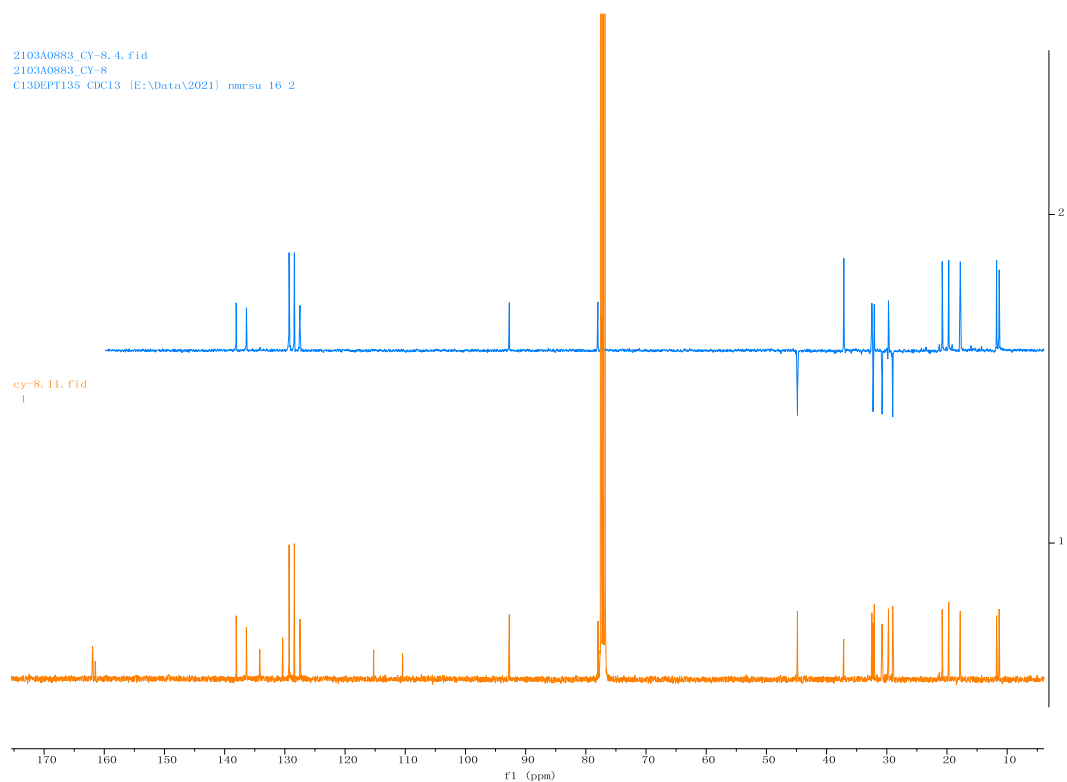

**Figure S4** DEPT 135 of **1**

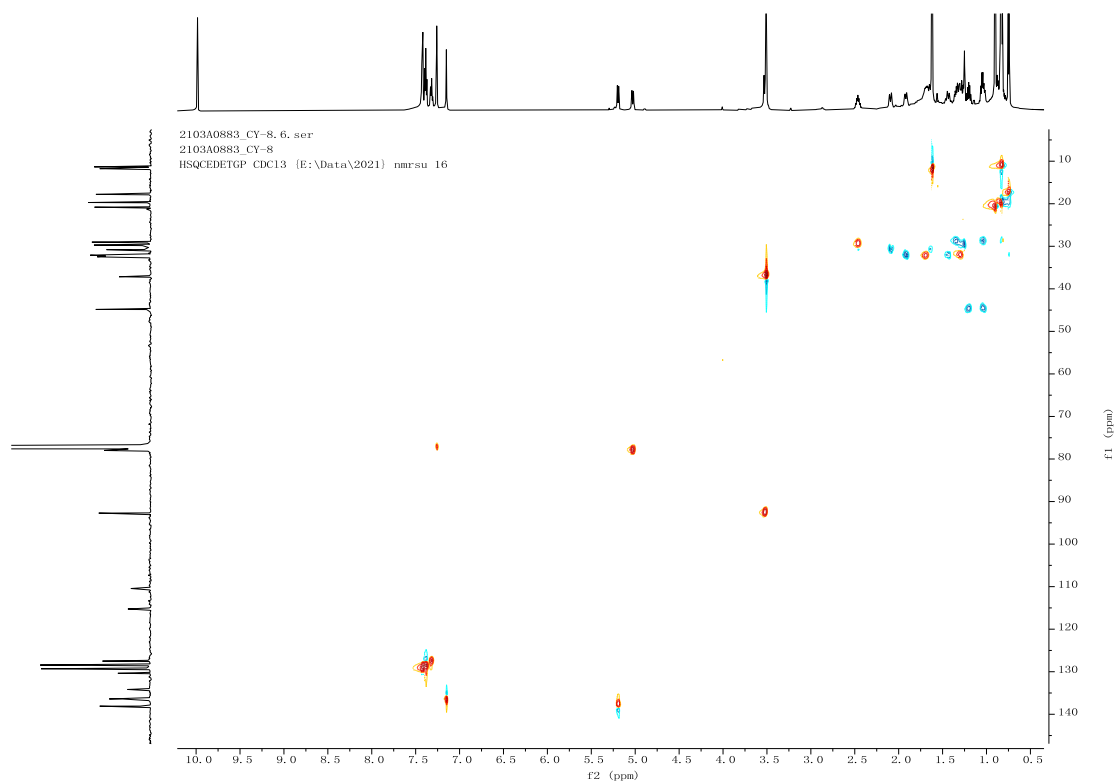

**Figure S5** HSQC spectrum of **1**

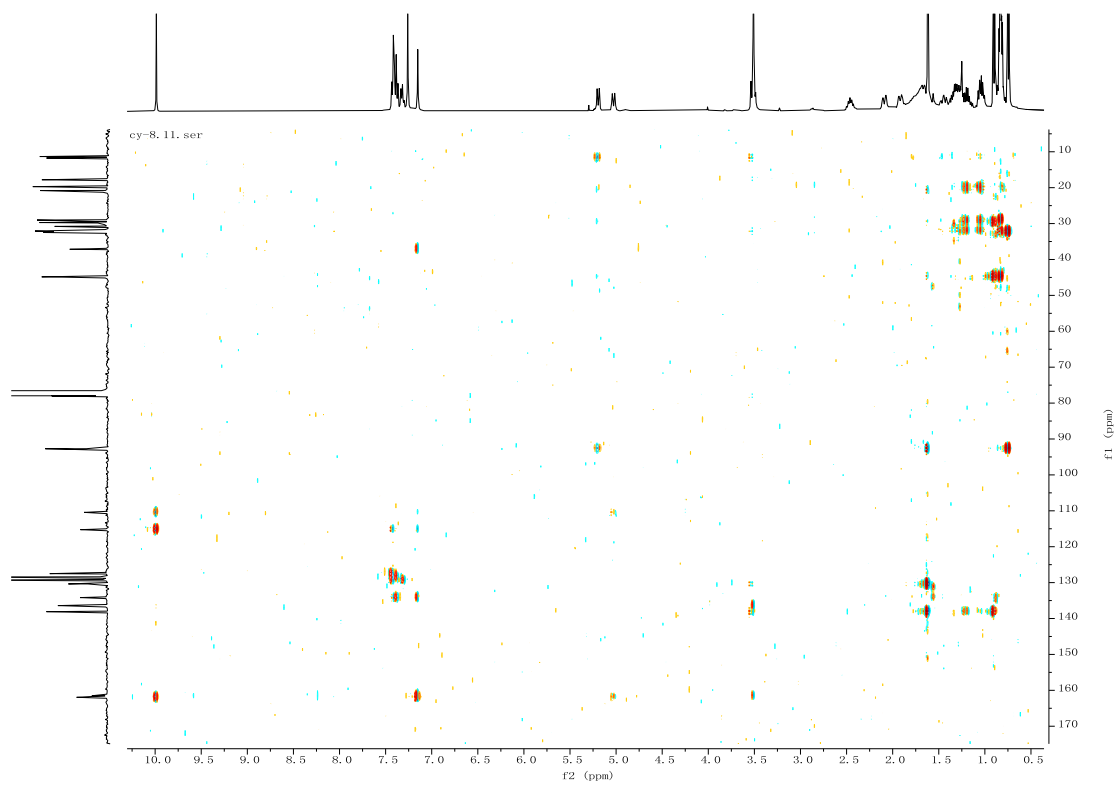

**Figure S6** HMBC spectrum of **1**

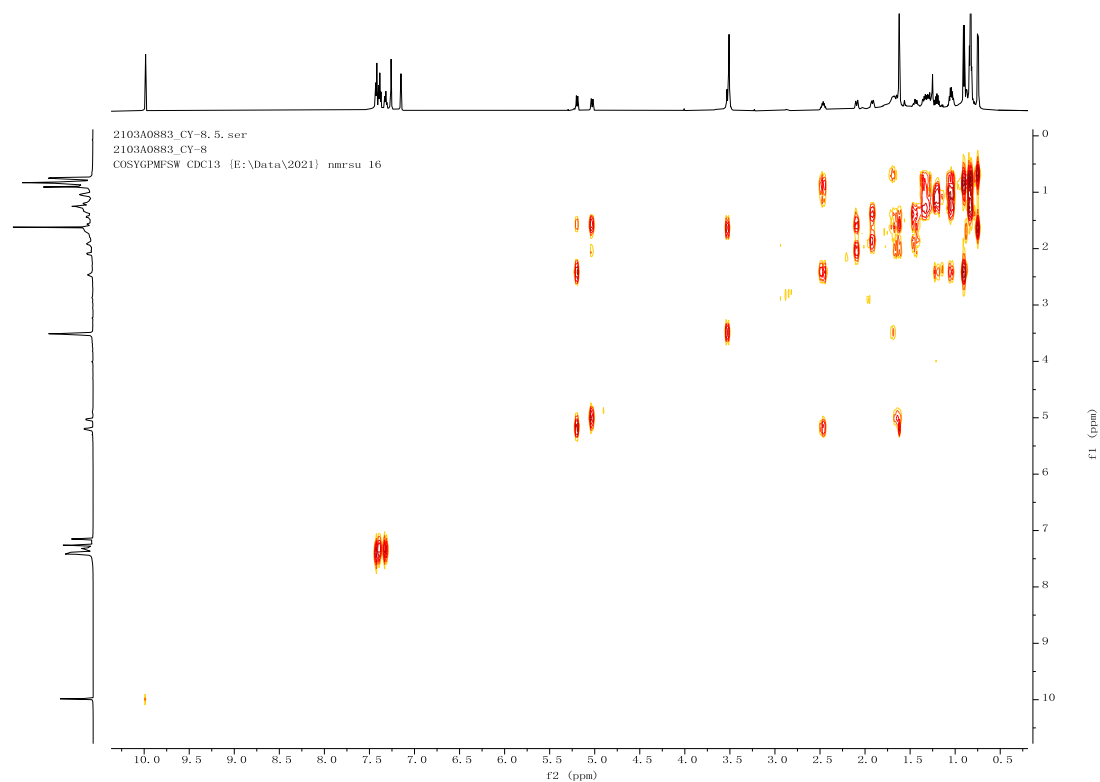

**Figure S7** COSY spectrum of **1**

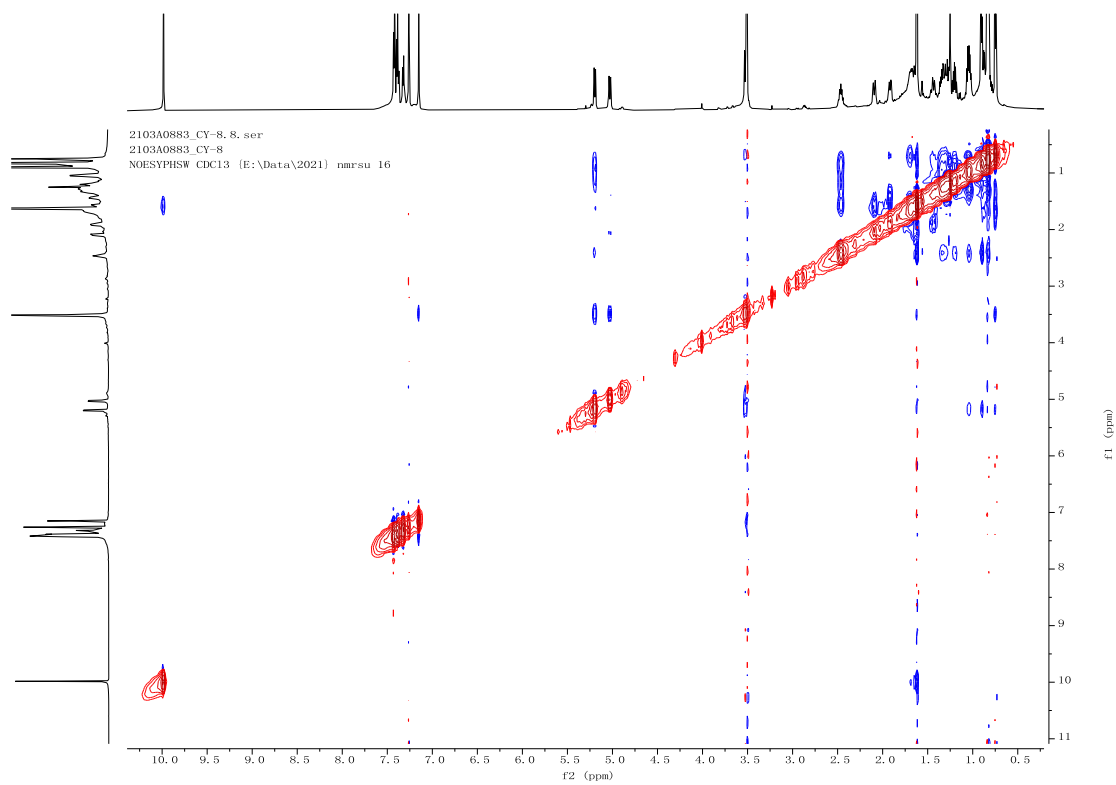

**Figure S8** NOESY spectrum of **1**

2103a1355-2\_HRMS #18-27 RT: 0.09-0.12 AV: 10 SB: 1 0.03 NL: 1.5  
T: FTMS + c ESI Full ms [200.00-800.00]

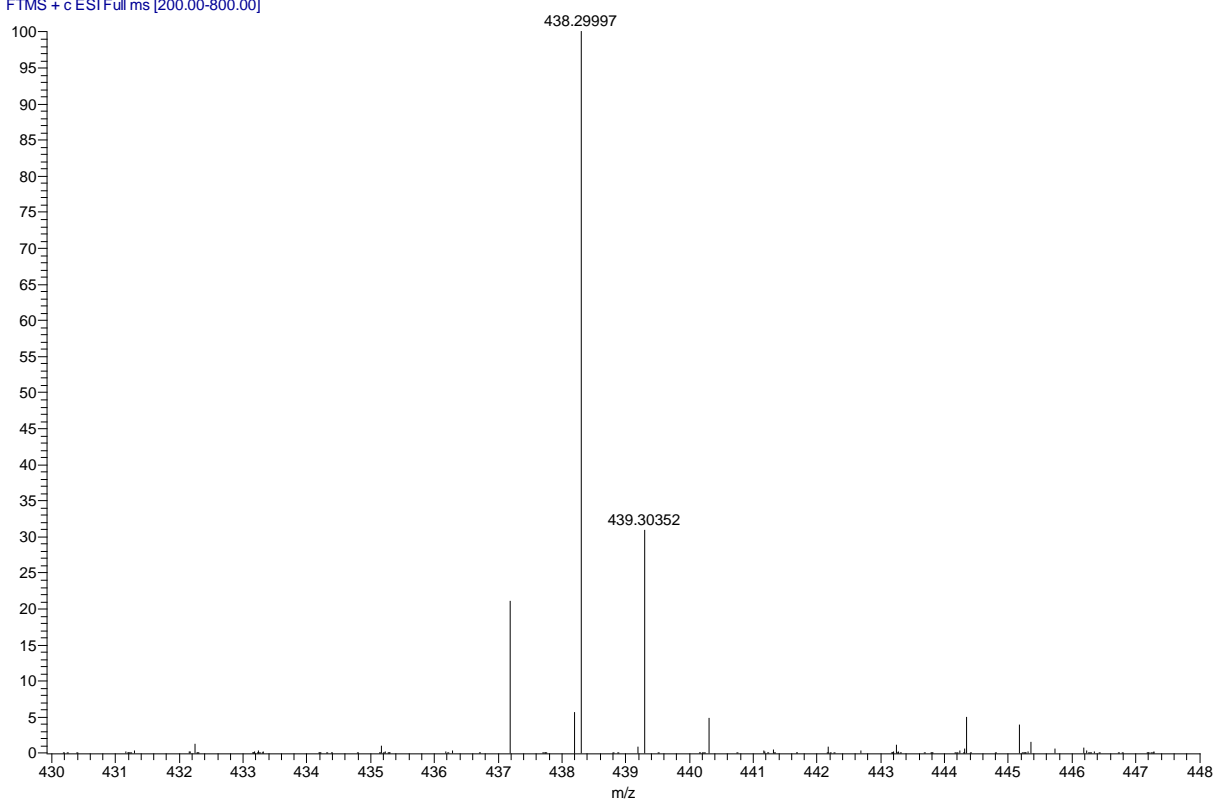

**Figure S9** HR-ESI-MS spectrum of **1**

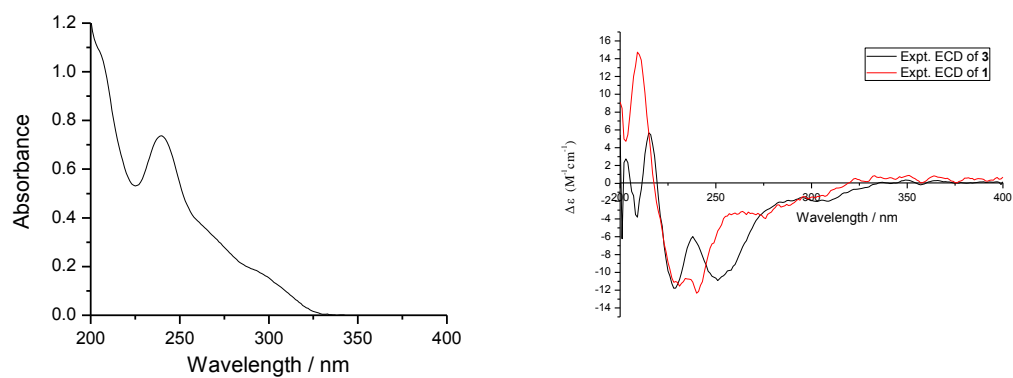

**Figure S10** UV spectrum of **1** and ECD spectra of **1** and **3**.

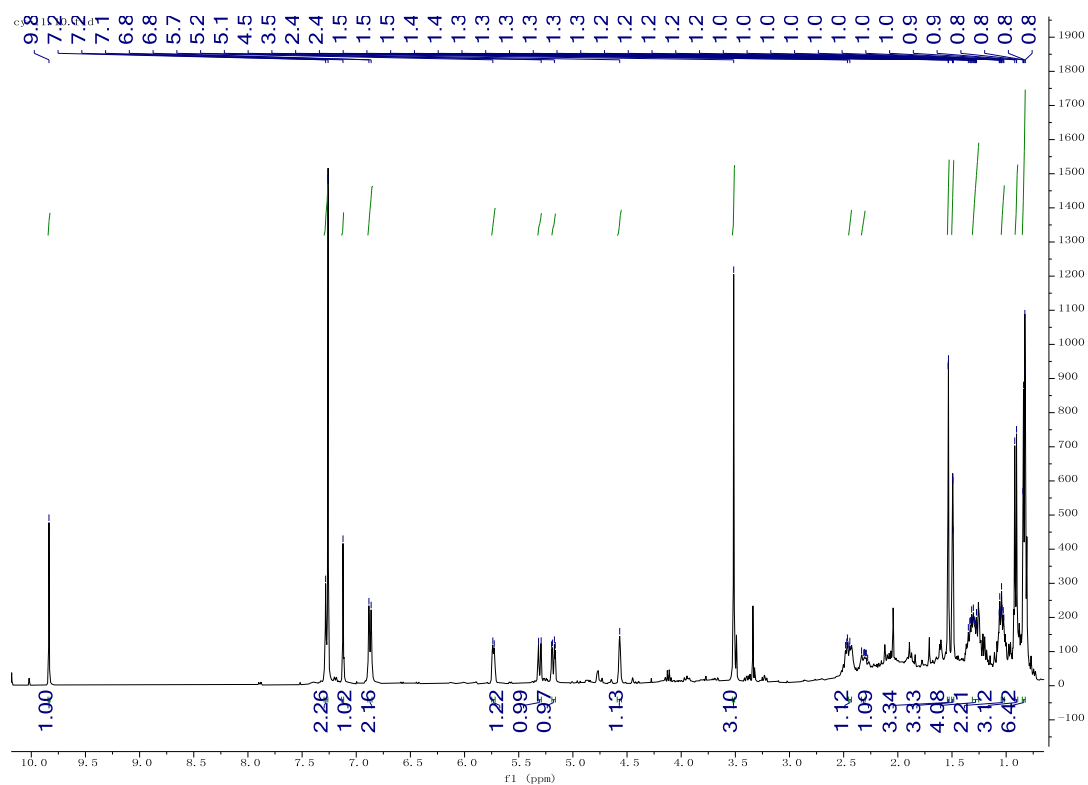

**Figure S11** <sup>1</sup>H NMR of **2**

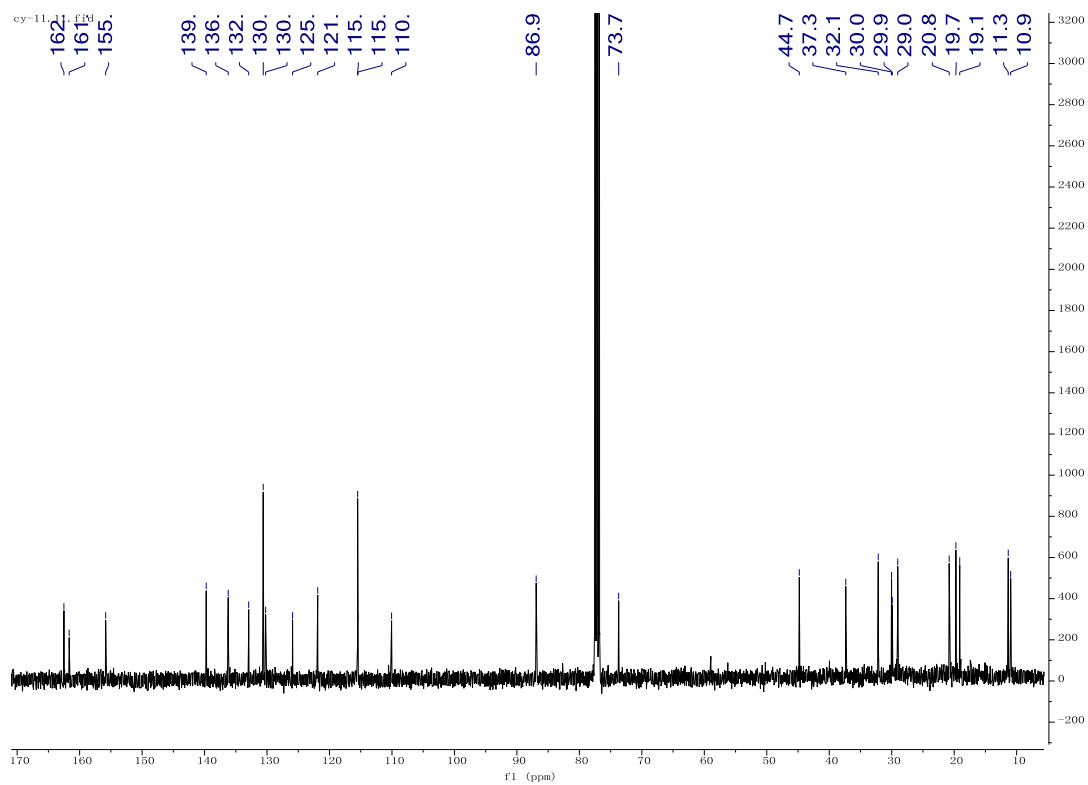

**Figure S12** <sup>13</sup>C NMR of **2**

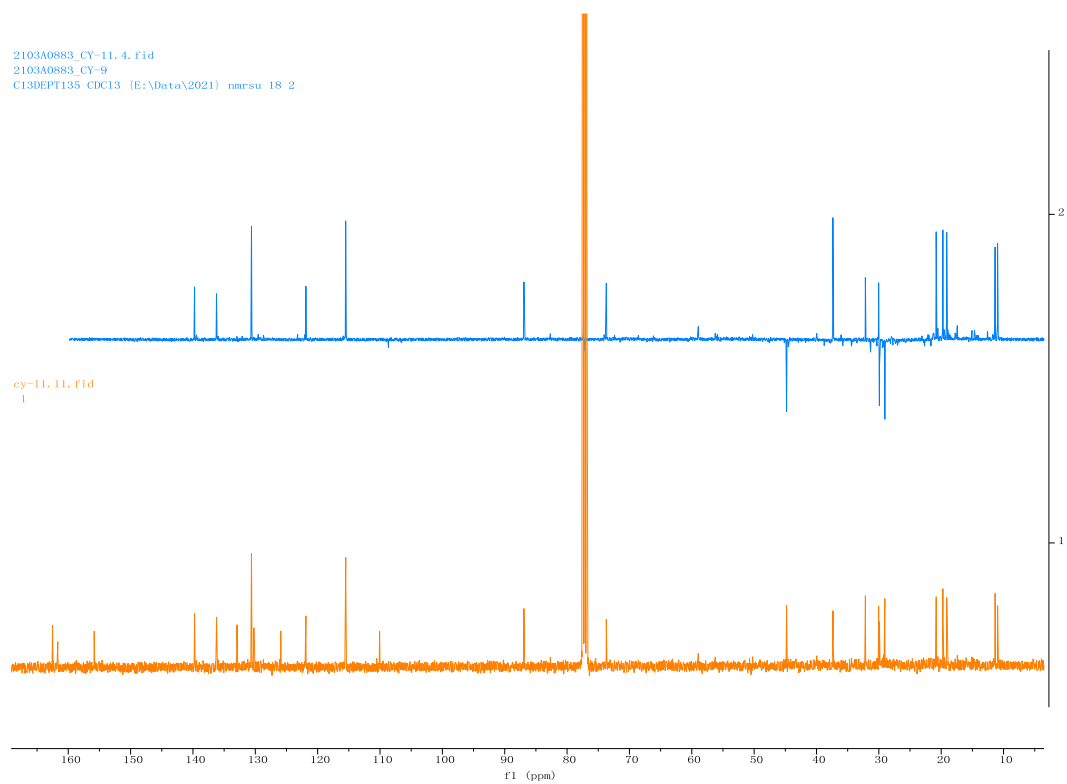

**Figure S13 DEPT 135 of 2**

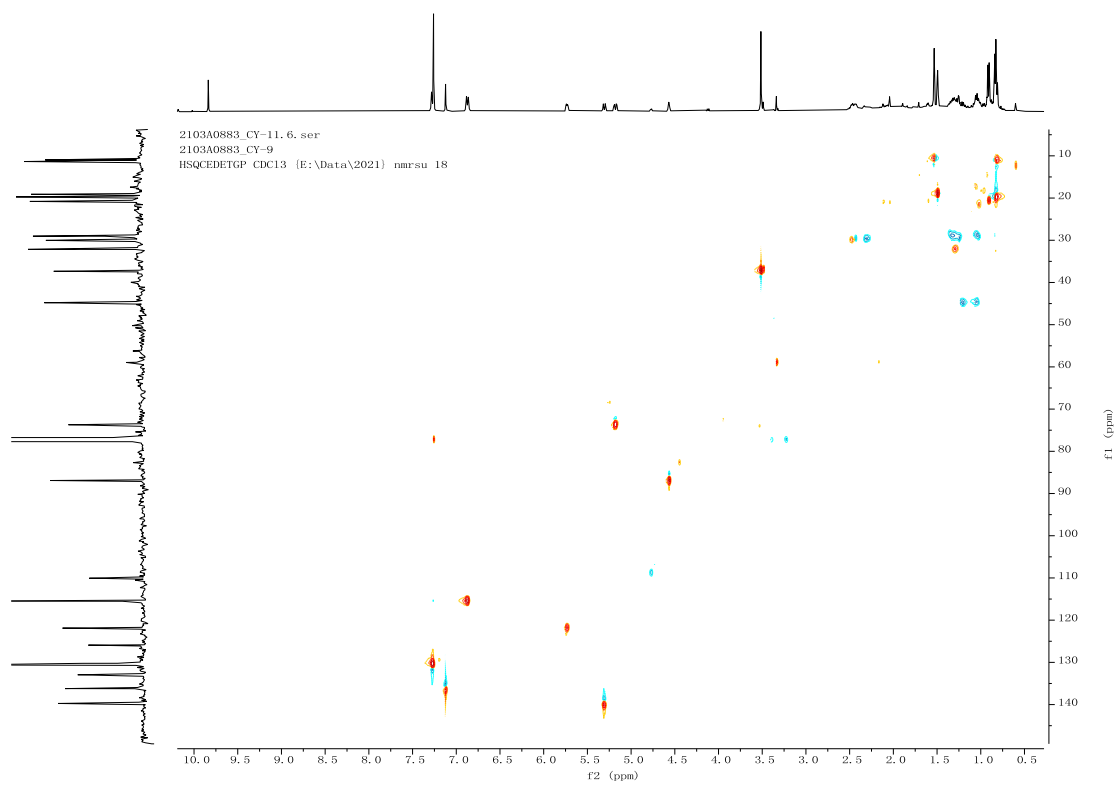

**Figure S14 HSQC spectrum of 2**

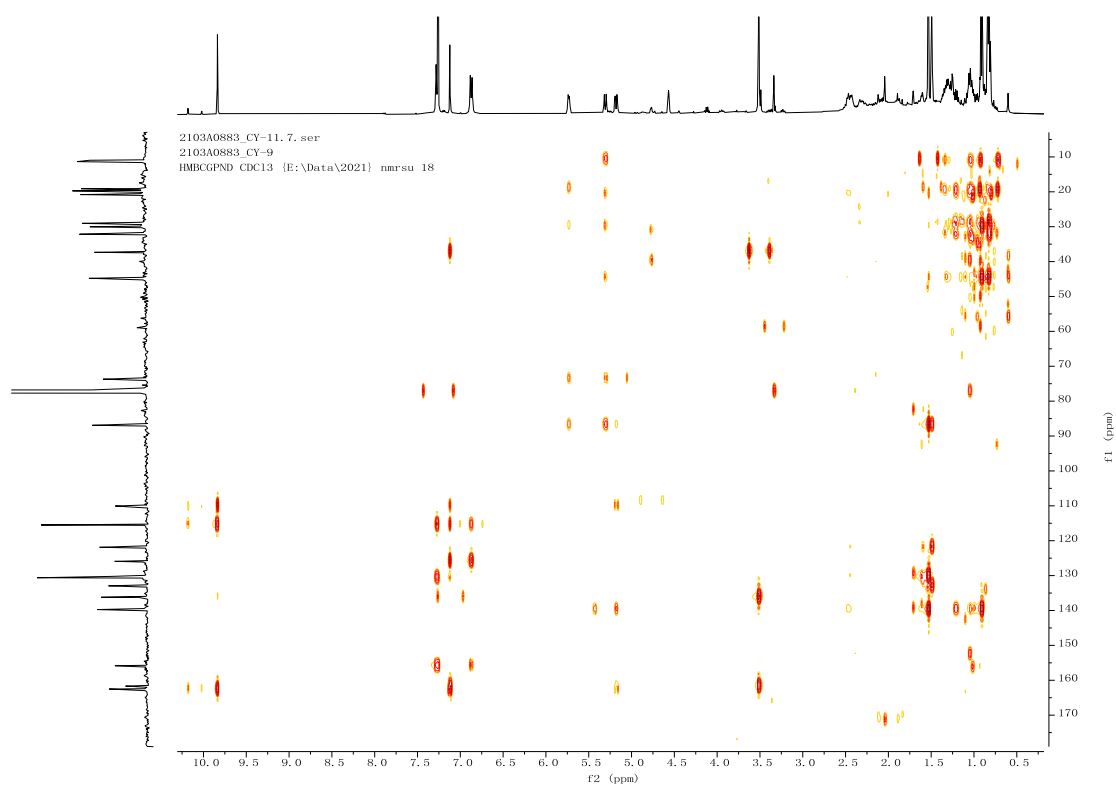

**Figure S15** HMBC spectrum of **2**

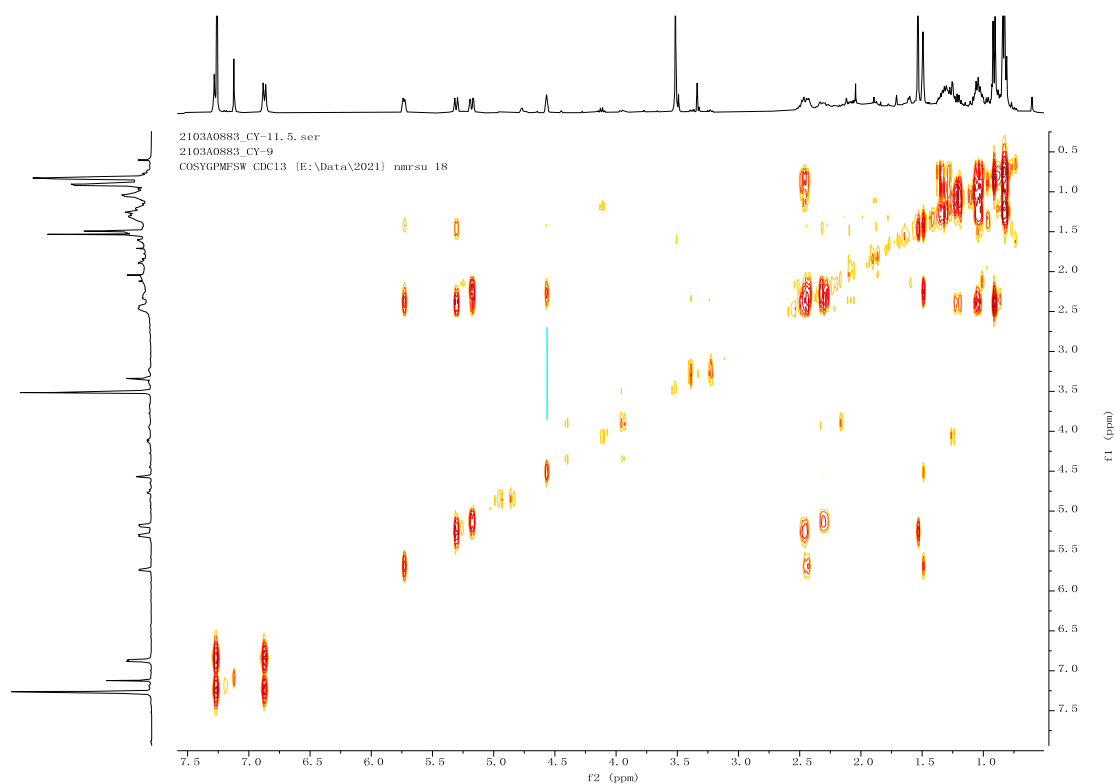

**Figure S16** COSY spectrum of **2**

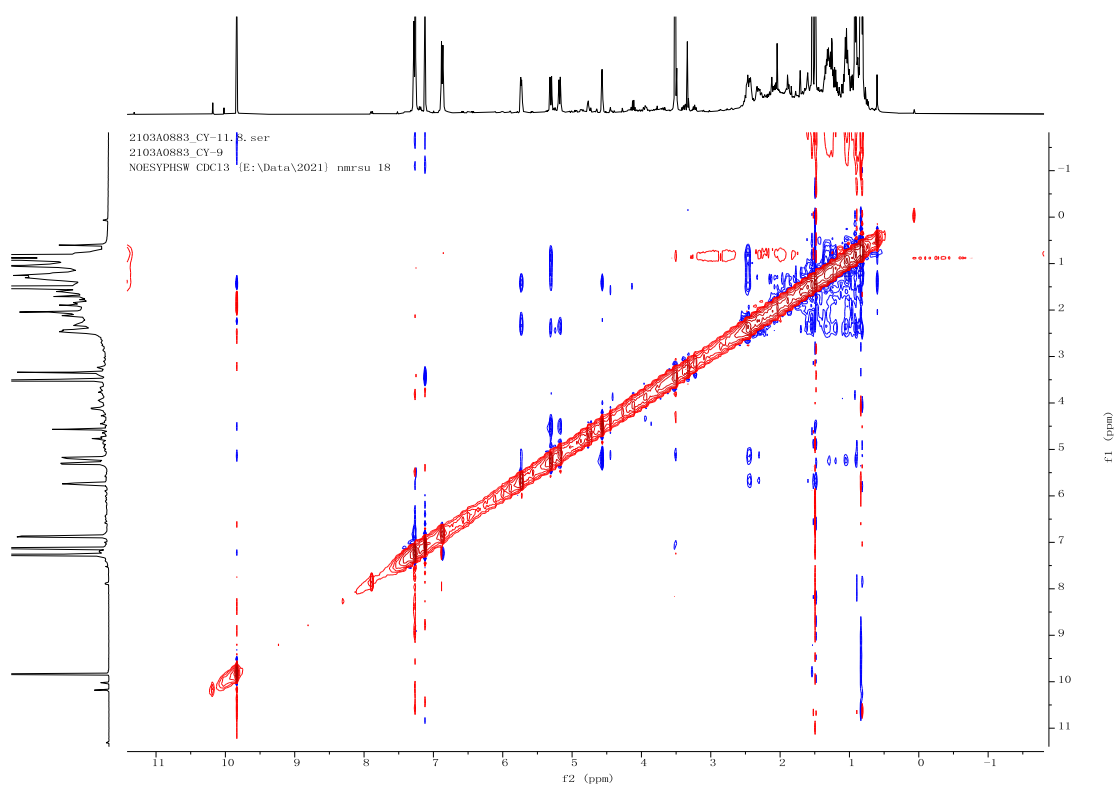

**Figure S17** NOESY spectrum of **2**

D:\Data\...2103a1355-3\_HRMS  
LTQ Orbitrap Elite

3/24/2021 5:39:07 PM

CY-11

2103a1355-3\_HRMS #20-30 RT: 0.09-0.14 AV: 11 SB: 1 0.04 NL: 9.0  
T: FTMS + c ESI Full ms [200.00-800.00]

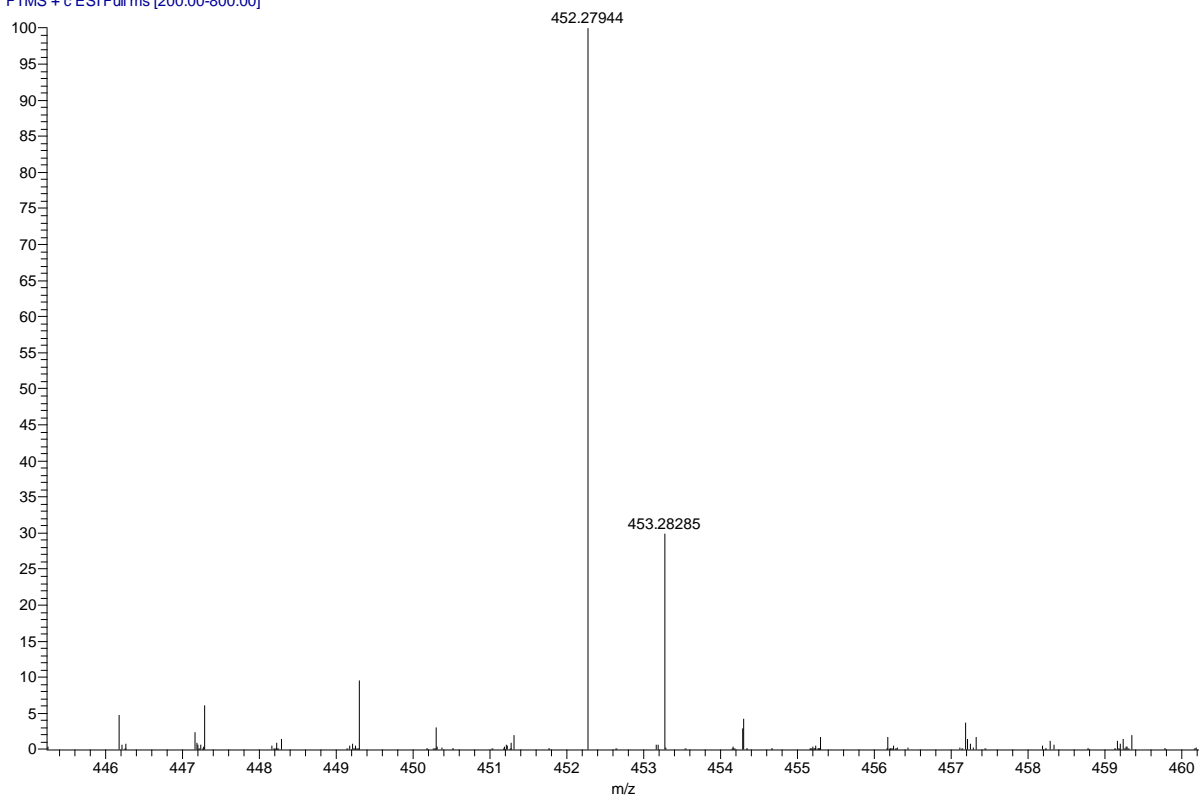

**Figure S18** HR-ESI-MS spectrum of **2**

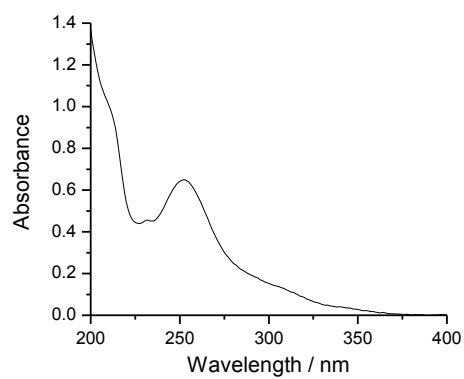

**Figure S19** UV spectrum of **2**

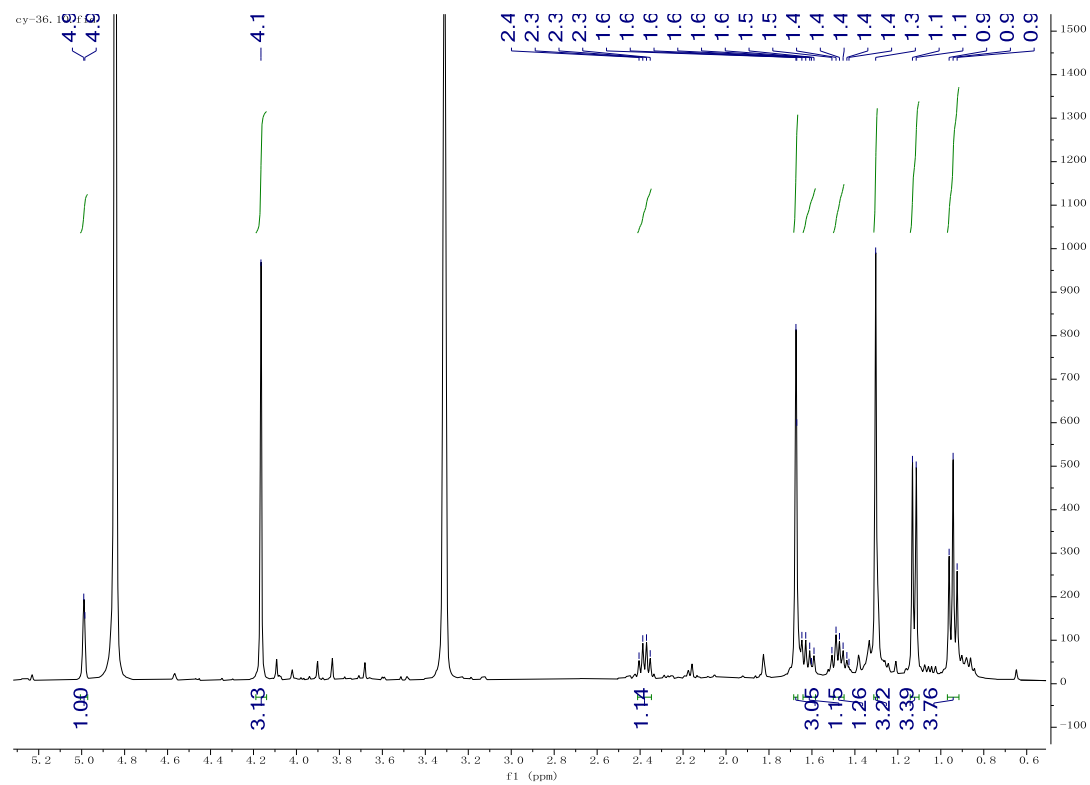

**Figure S20** <sup>1</sup>H NMR of **7**

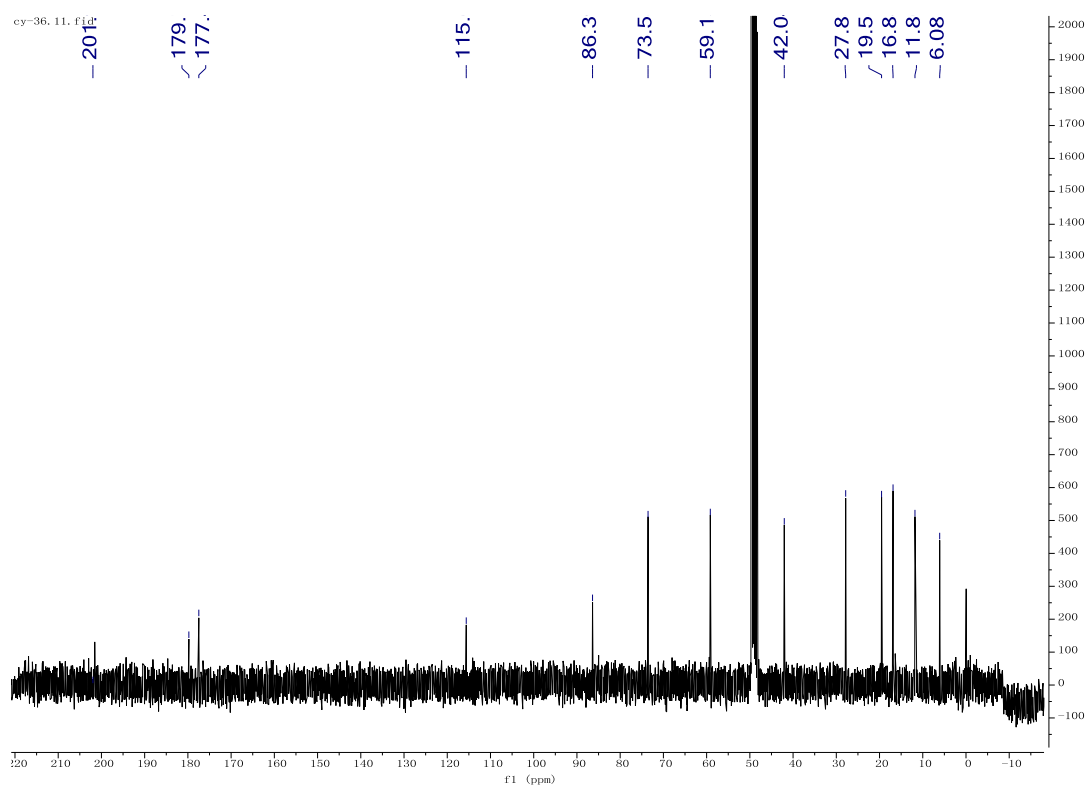

**Figure S21**  $^{13}\text{C}$  NMR of **7**

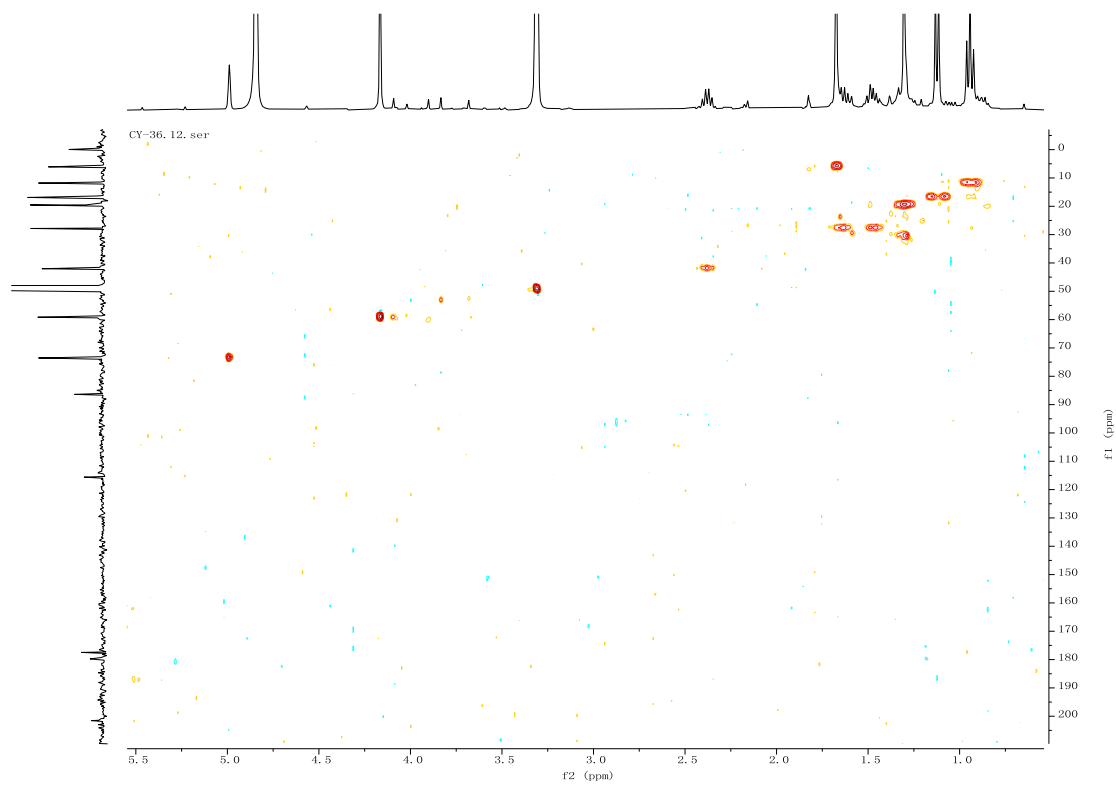

**Figure S22** HSQC spectrum of **7**

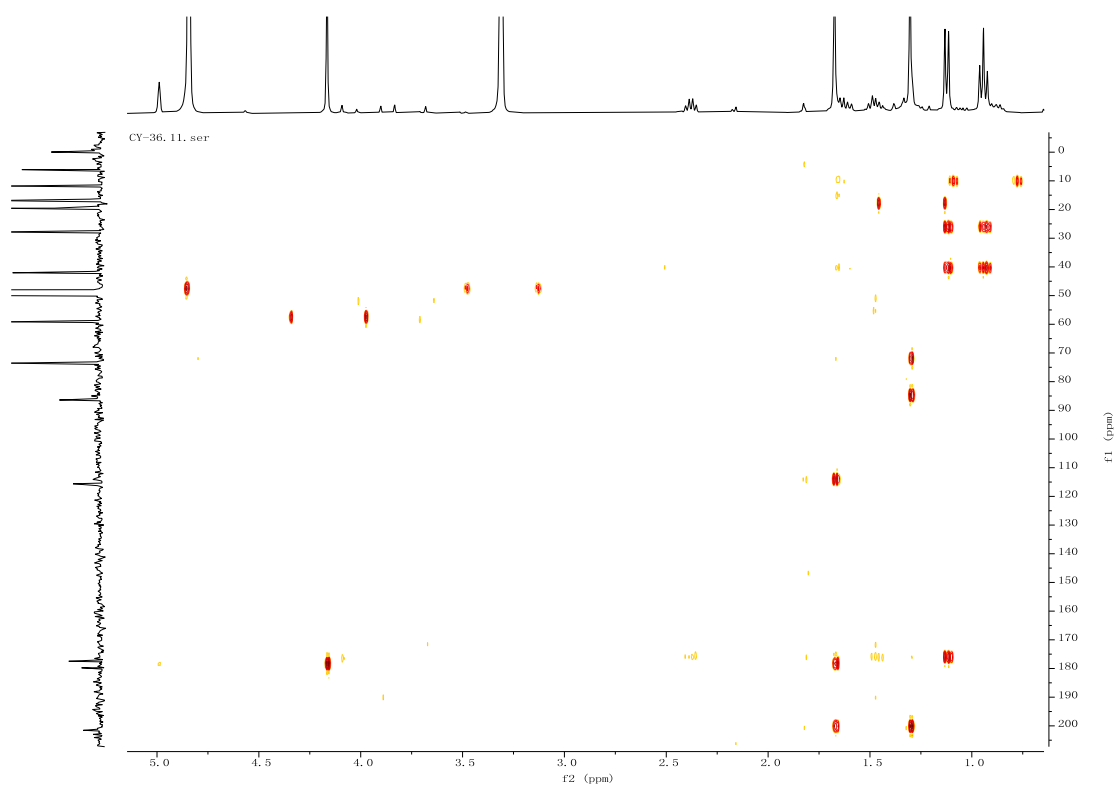

**Figure S23** HMBC spectrum of **7**

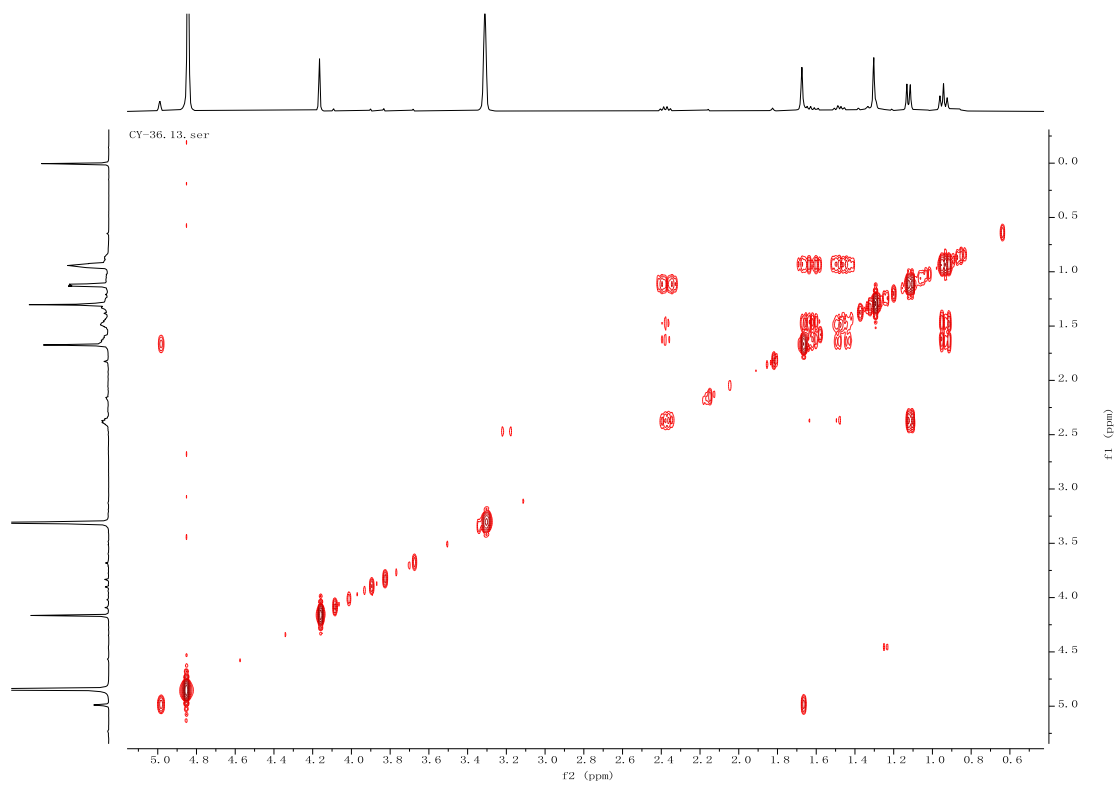

**Figure S24** COSY spectrum of **7**

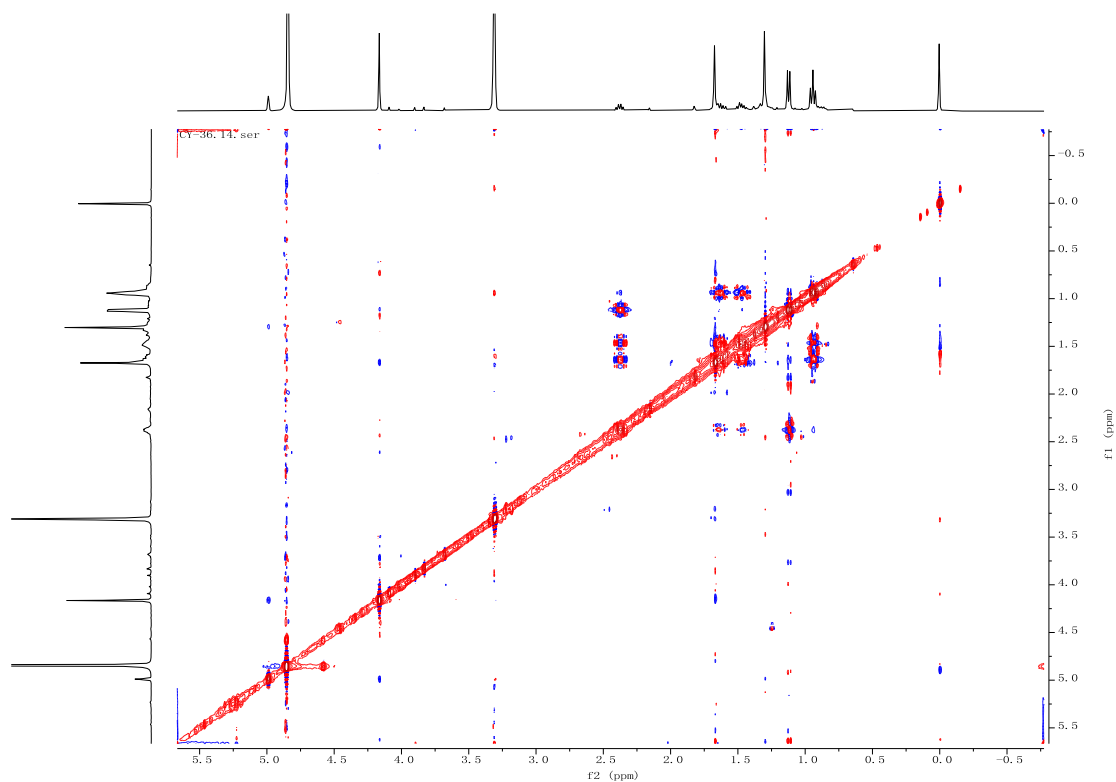

**Figure S25** NOESY spectrum of **7**

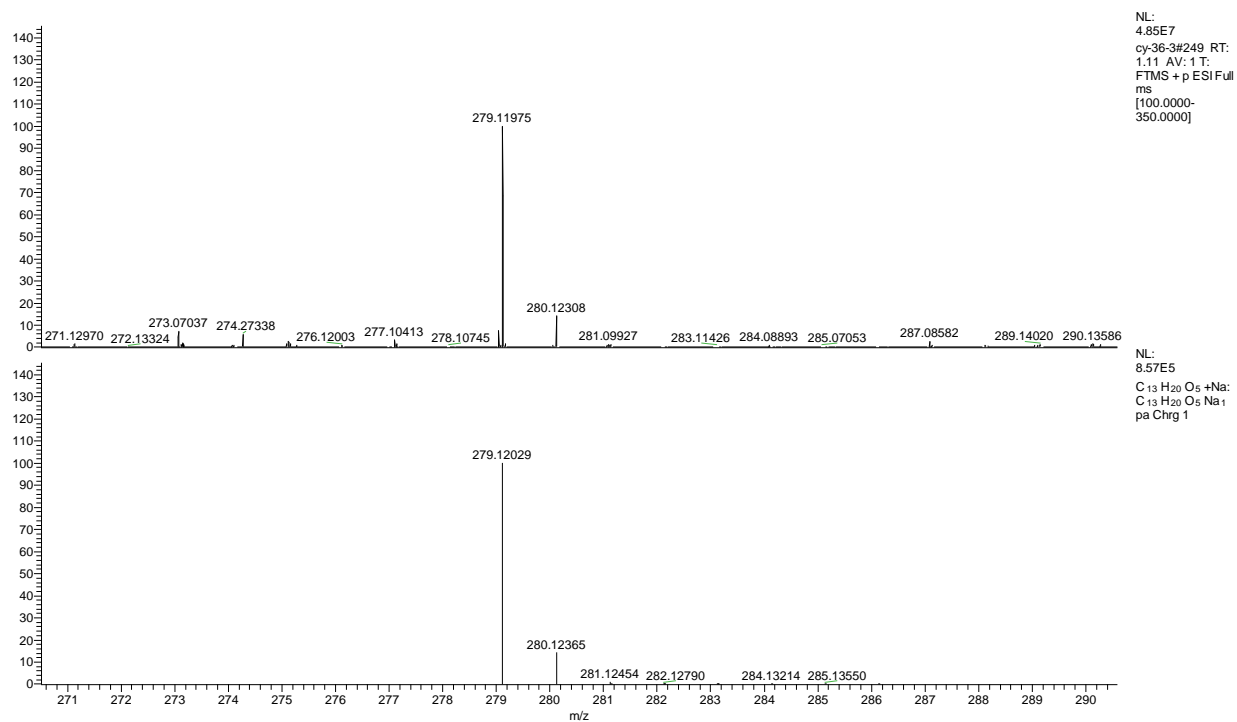

**Figure S26** HR-ESI-MS spectrum of **7**

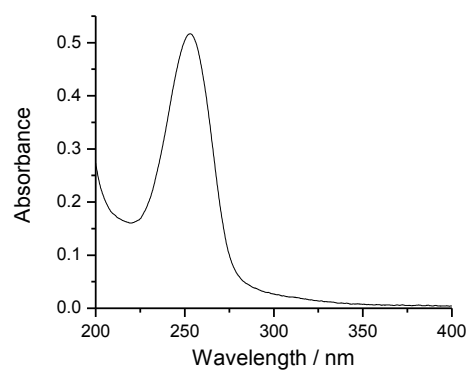

**Figure S27** UV spectrum of **7**

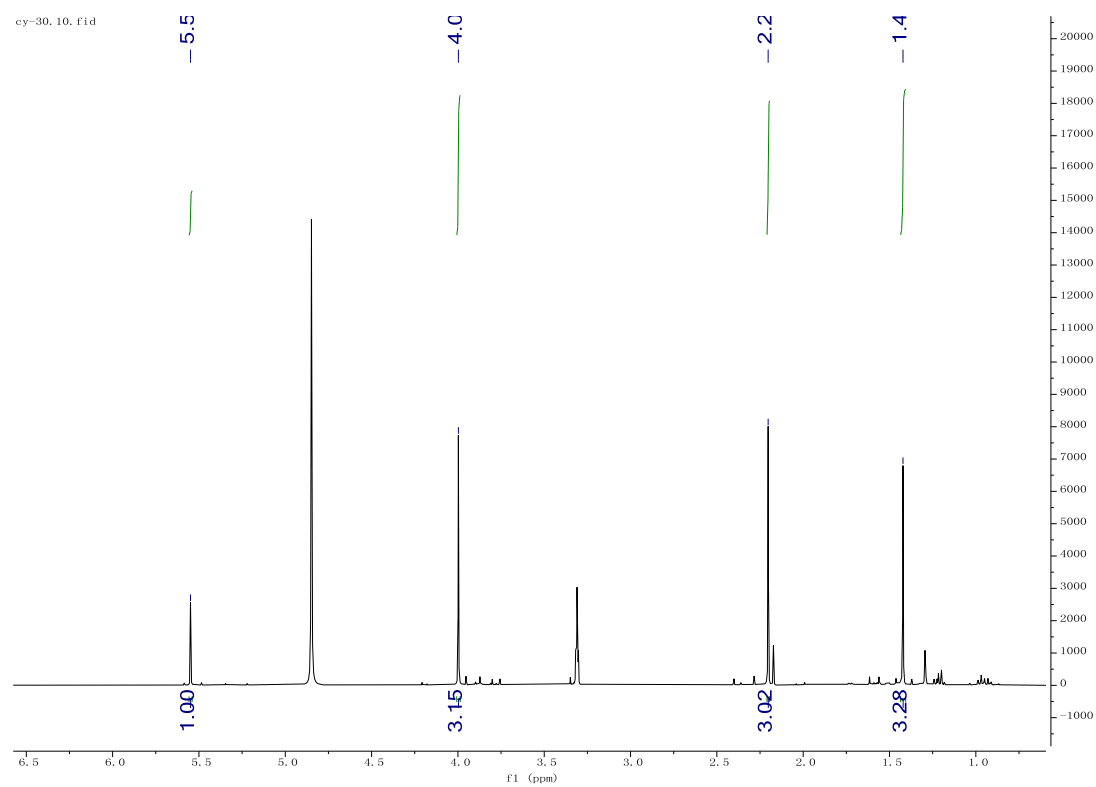

**Figure S28**  $^1\text{H}$  NMR of **8**

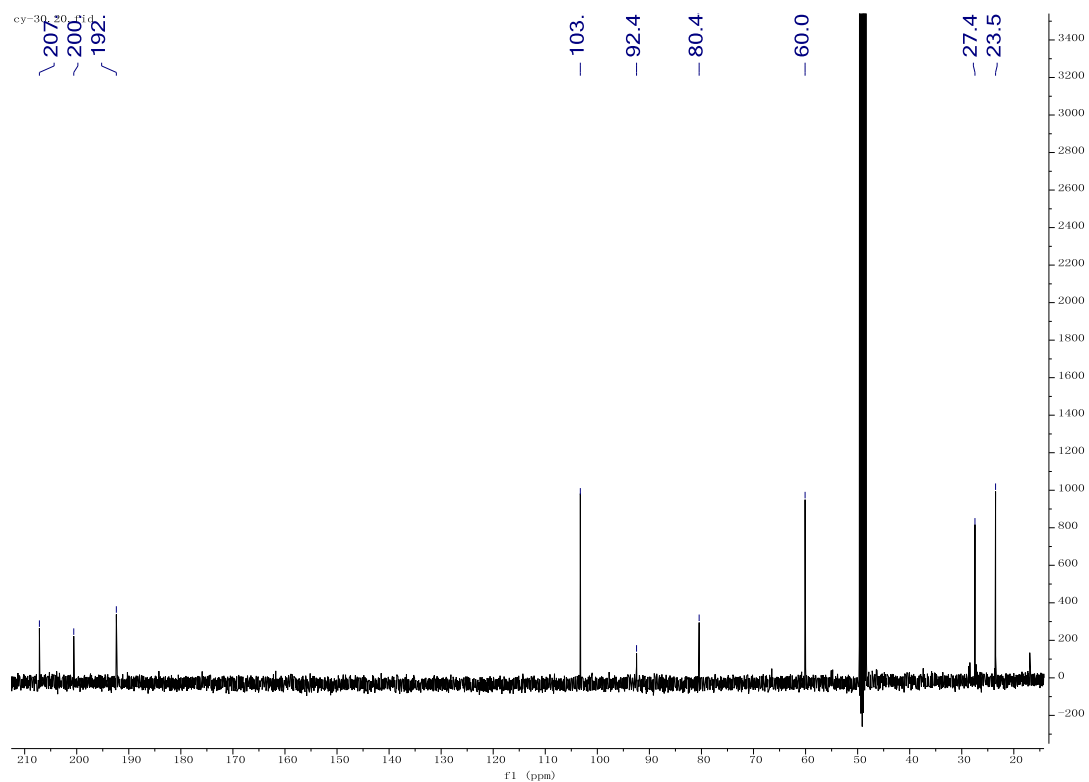

**Figure S29**  $^{13}\text{C}$  NMR of **8**

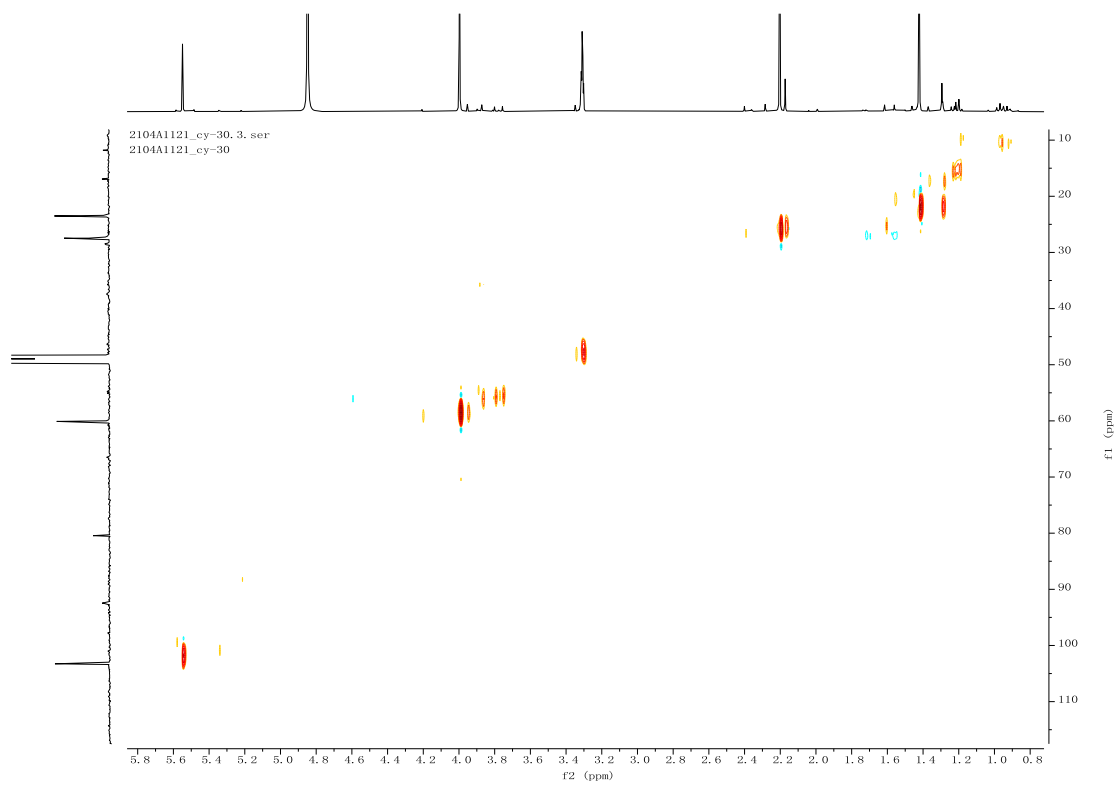

**Figure S30** HSQC spectrum of **8**

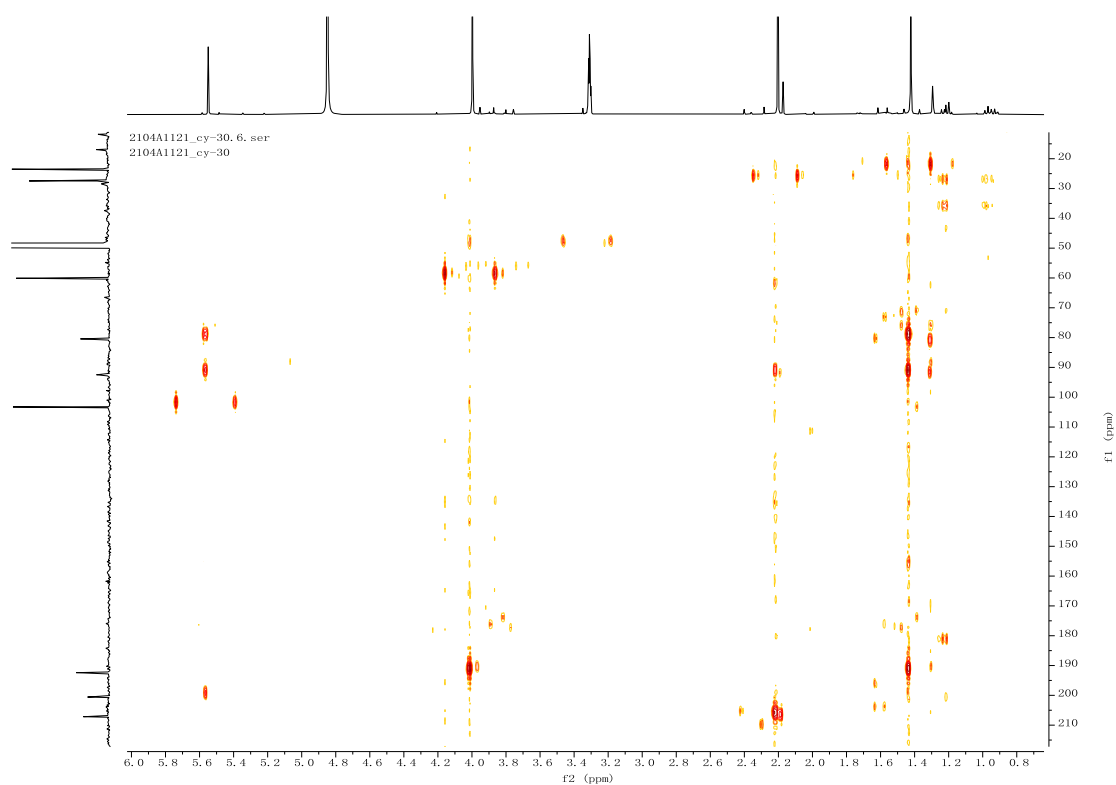

**Figure S31** HMBC spectrum of **8**

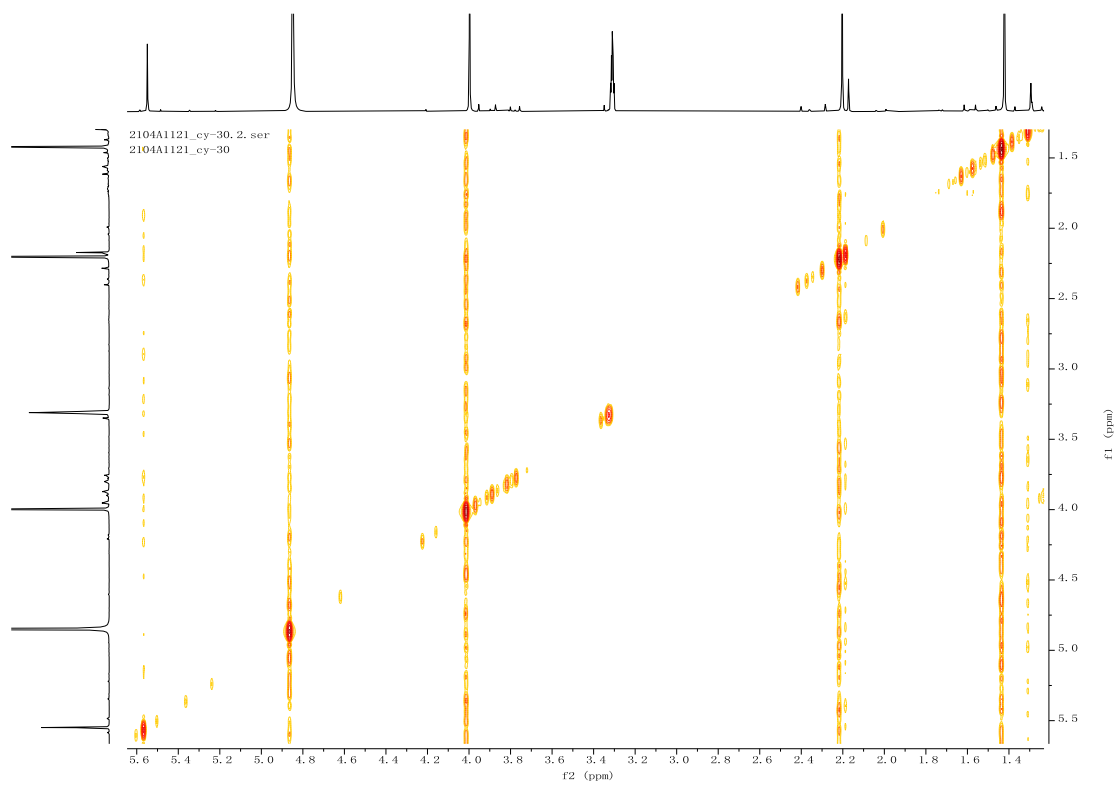

**Figure S32** COSY spectrum of **8**

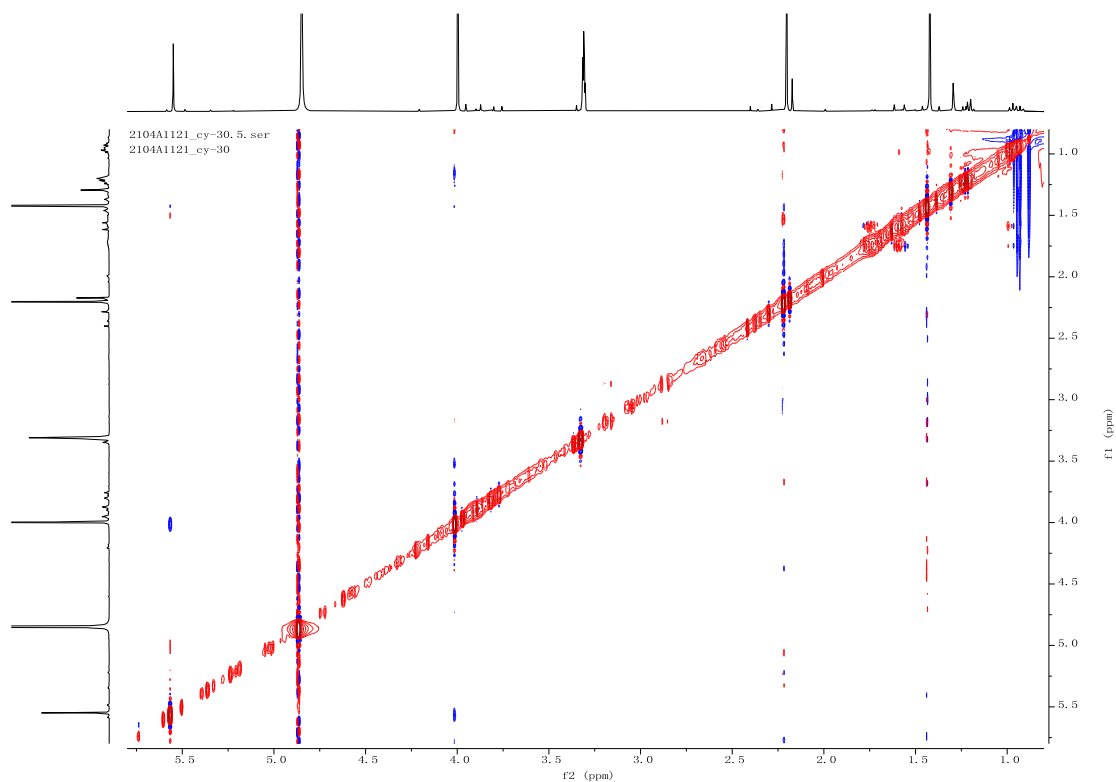

**Figure S33** NOESY spectrum of **8**

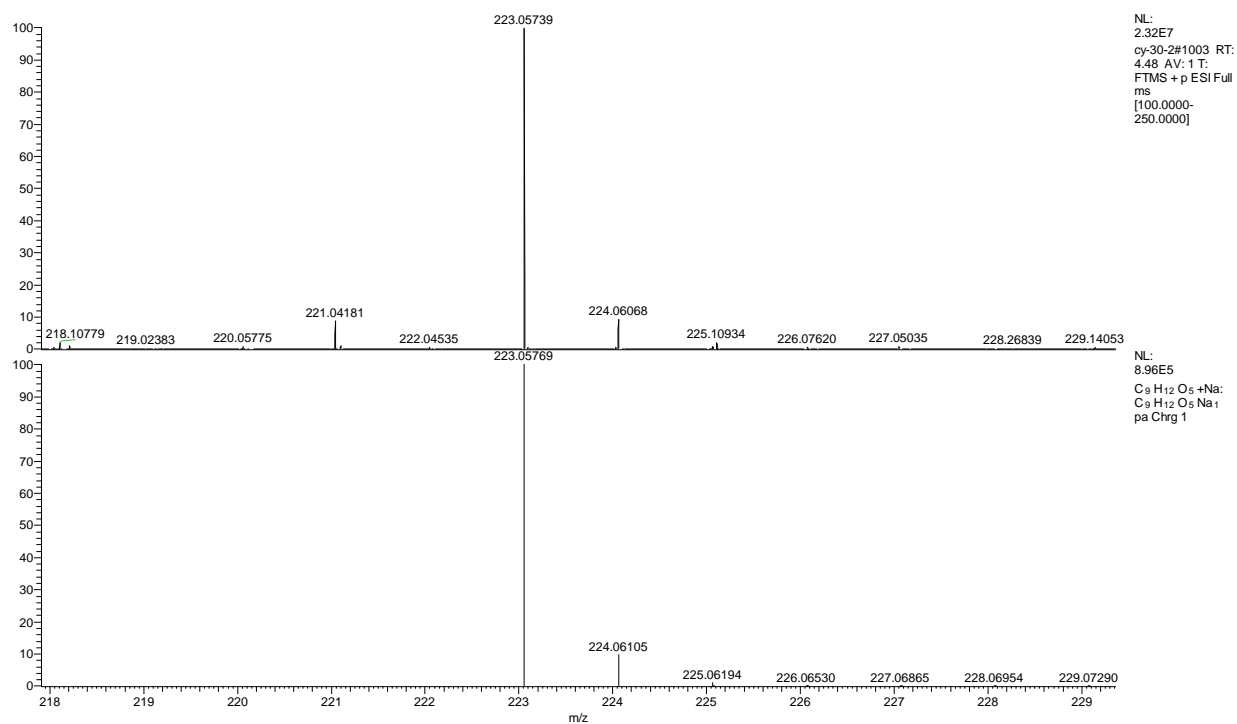

**Figure S34** HR-ESI-MS spectrum of **8**

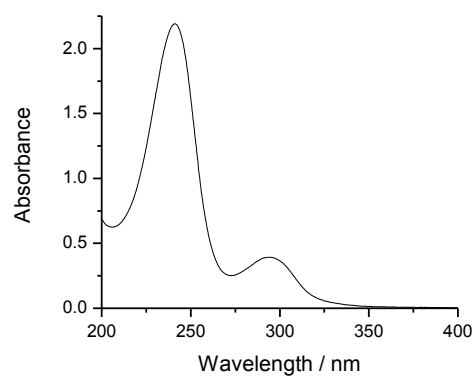

**Figure S35** UV spectrum of **8**

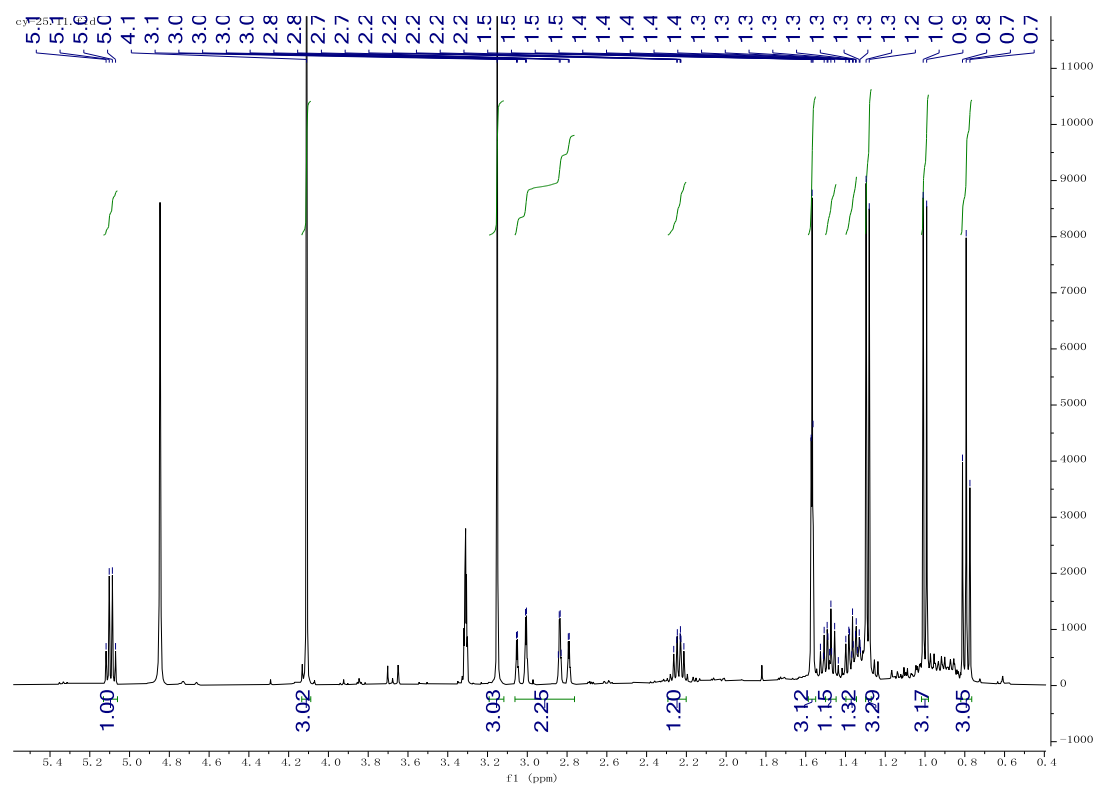

**Figure S36**  $^1\text{H}$  NMR of **9**

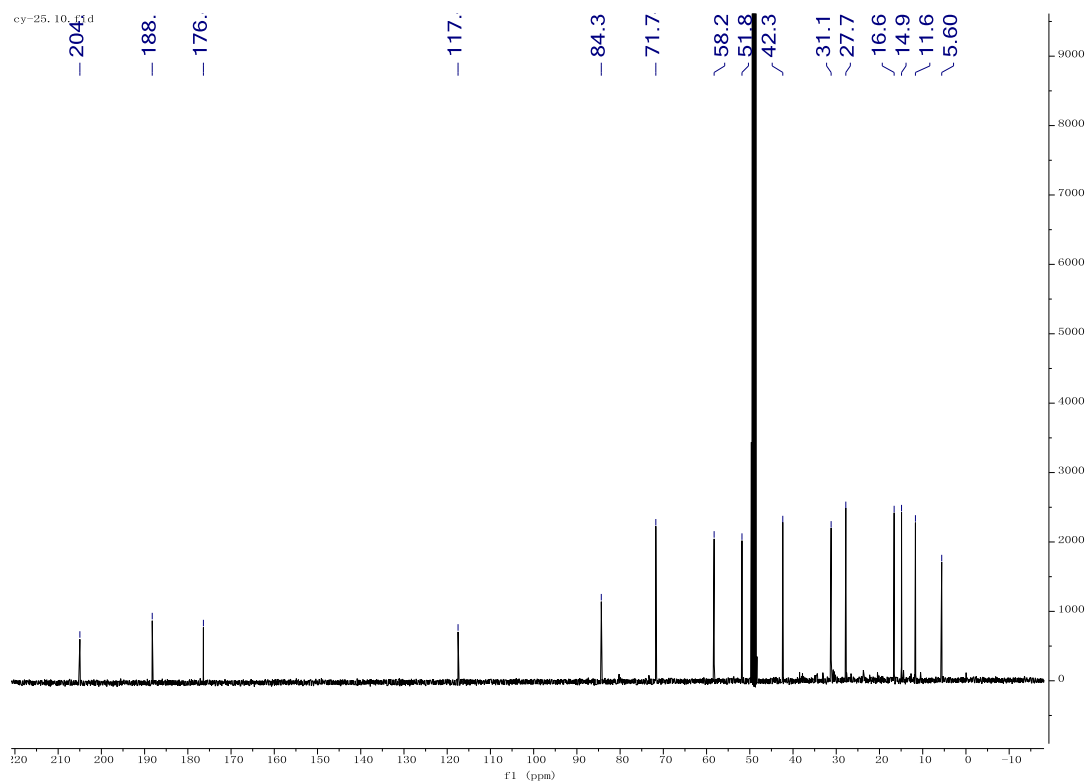

**Figure S37**  $^{13}\text{C}$  NMR of **9**

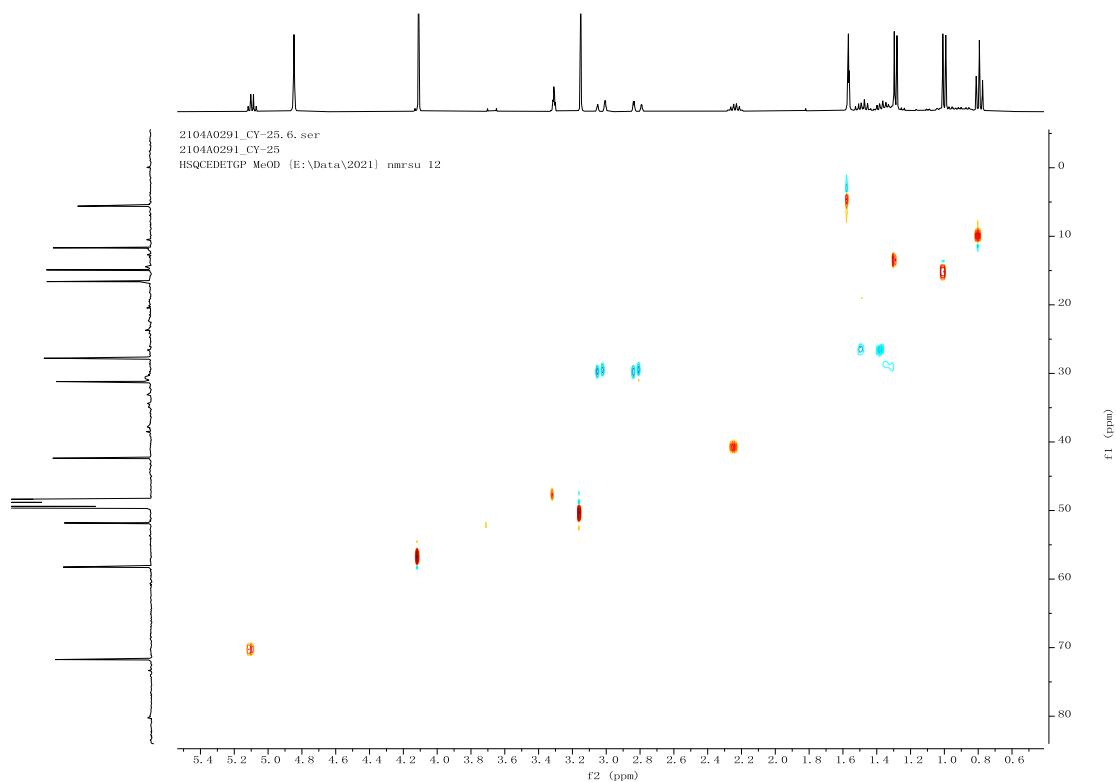

**Figure S38** HSQC spectrum of **9**

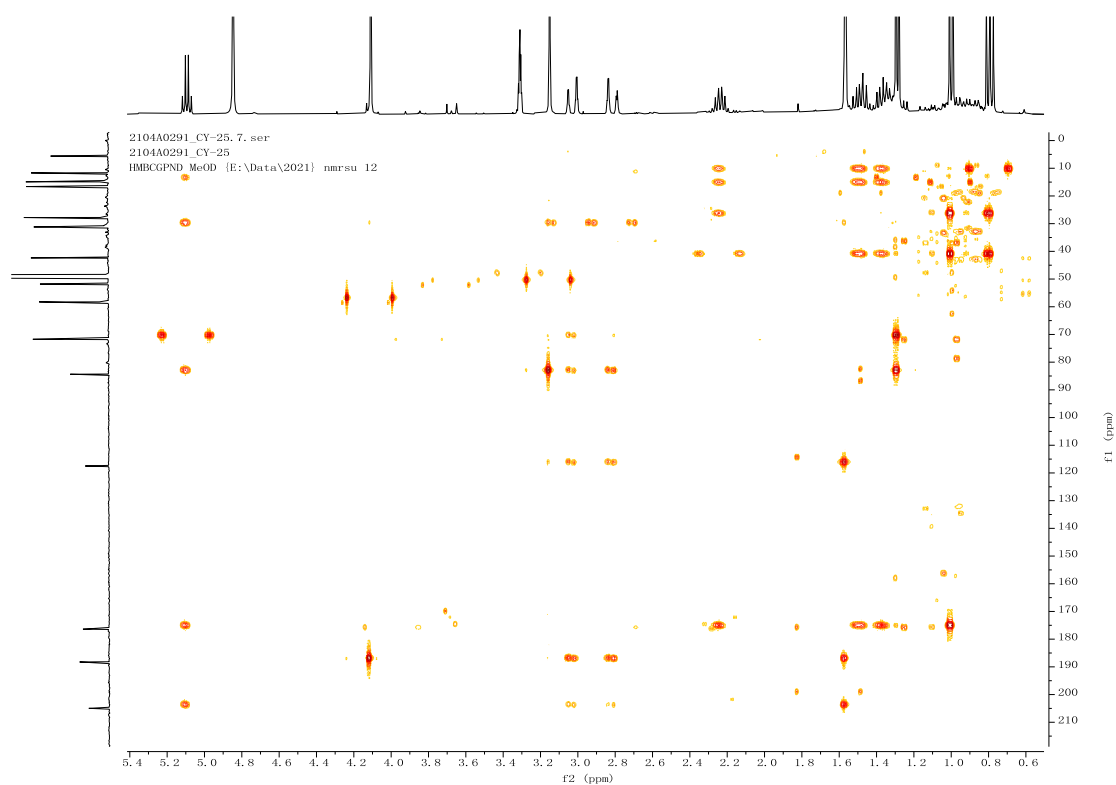

**Figure S39** HMBC spectrum of **9**

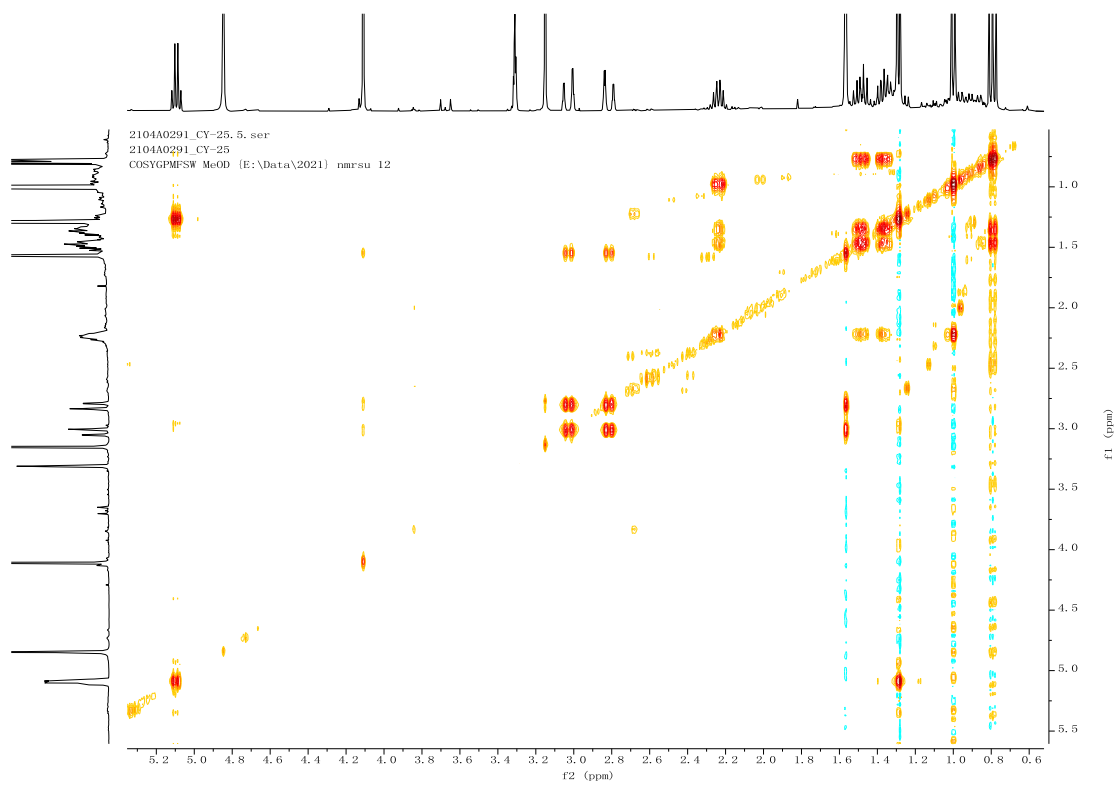

**Figure S40** COSY spectrum of **9**

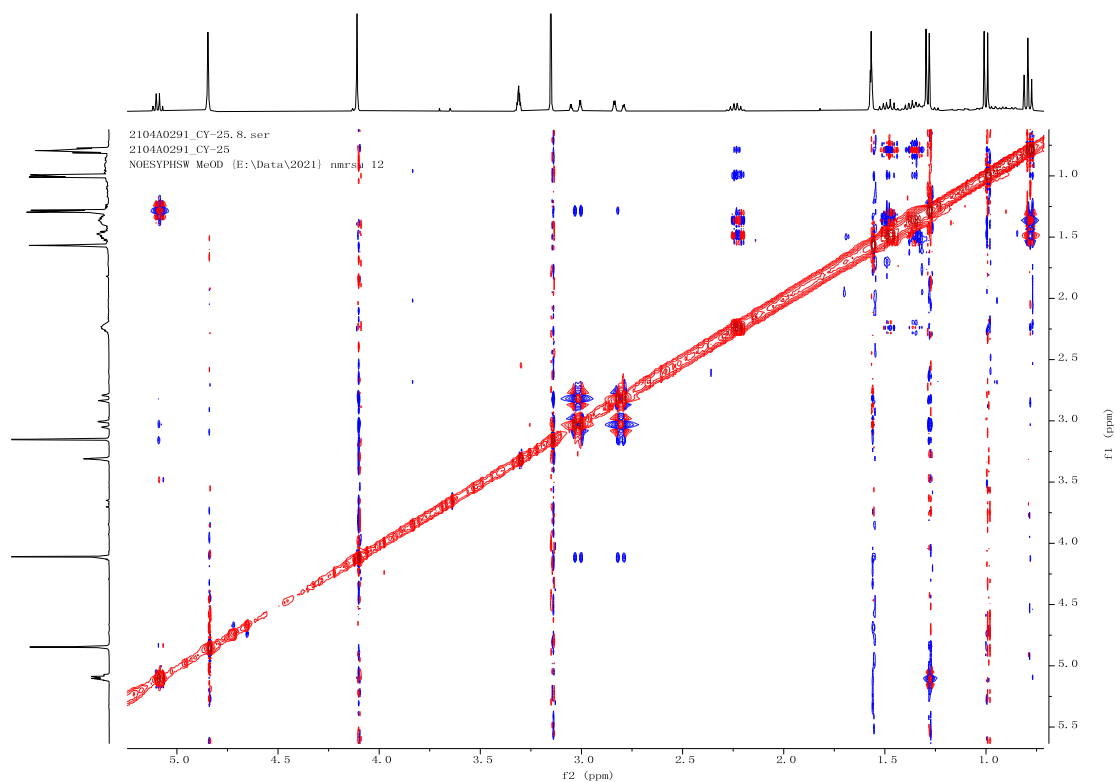

**Figure S41** NOESY spectrum of **9**

D:\Data\2021\04\Yang wencong\2104A0435-4

4/9/2021 4:22:13 PM

cy-25

LTQ Orbitrap Elite

2104A0435-4 #13-20 RT: 0.09-0.13 AV: 8 NL: 4.19E7

T: FTMS + c ESI Full ms [100.00-1000.00]

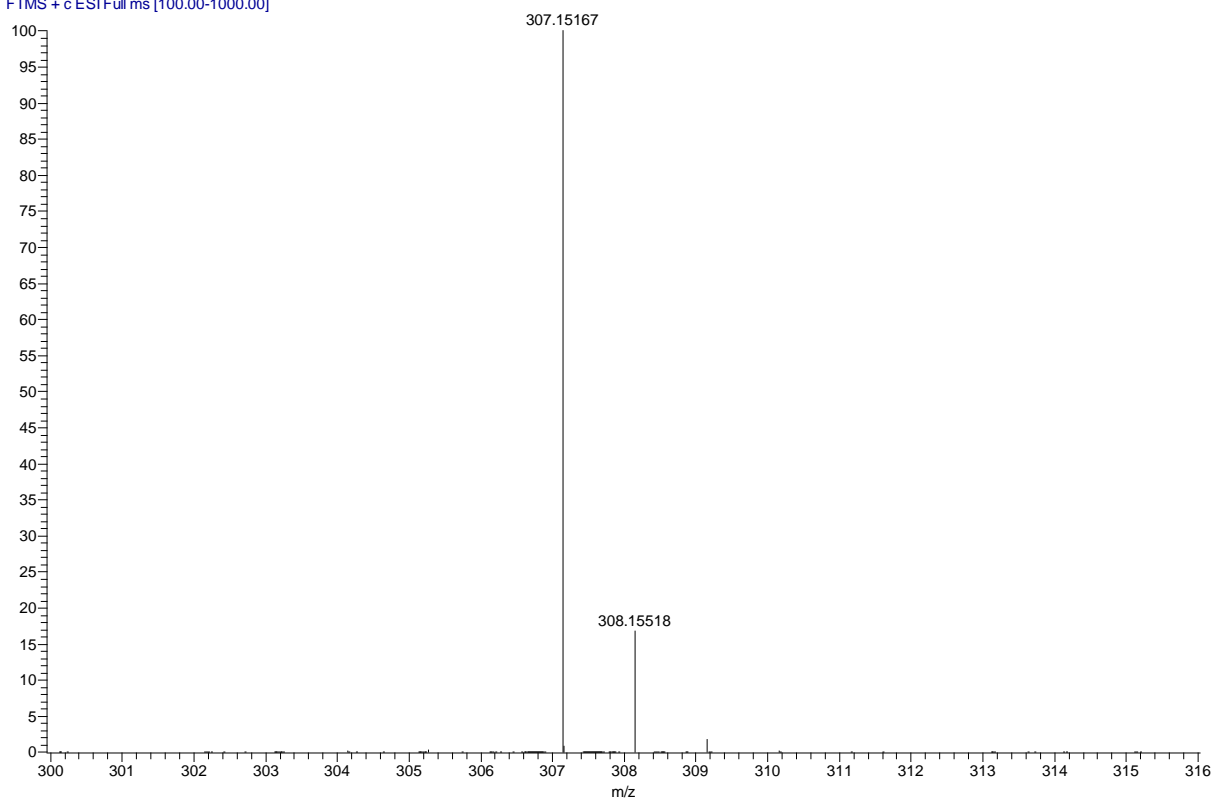

**Figure S42** HR-ESI-MS spectrum of **9**

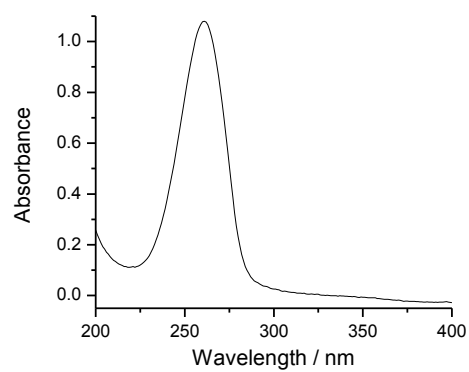

**Figure S43** UV spectrum of **9**

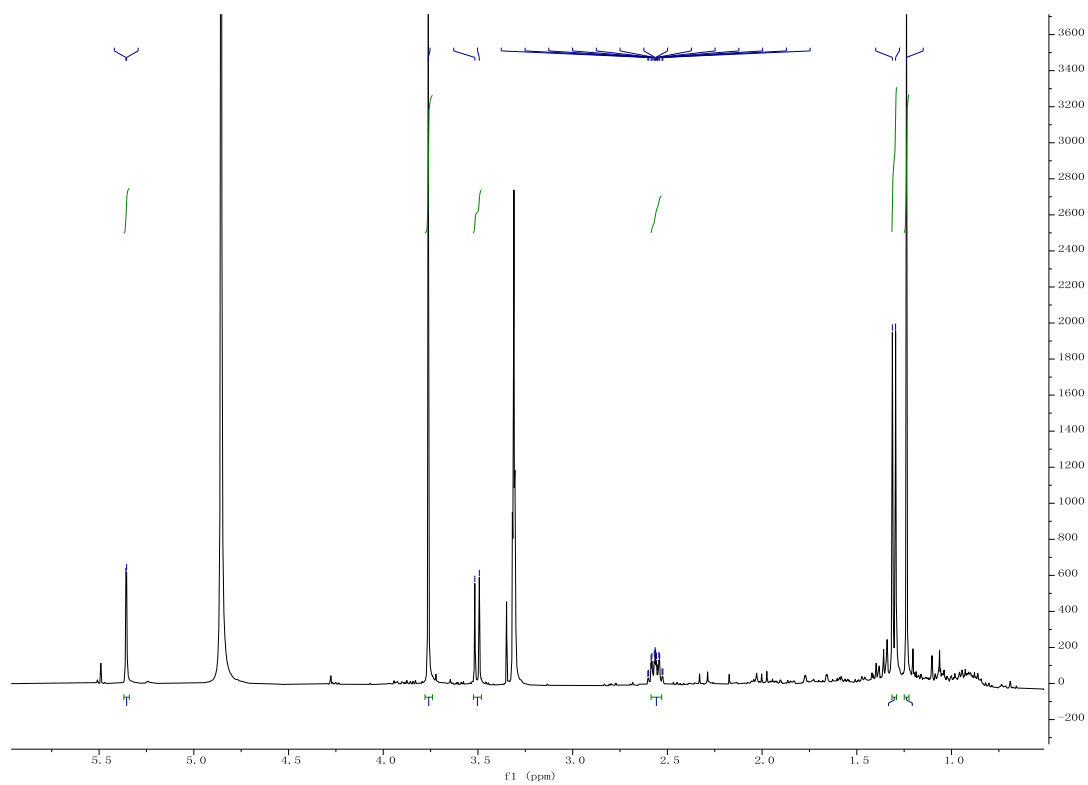

**Figure S44** <sup>1</sup>H NMR of **10**

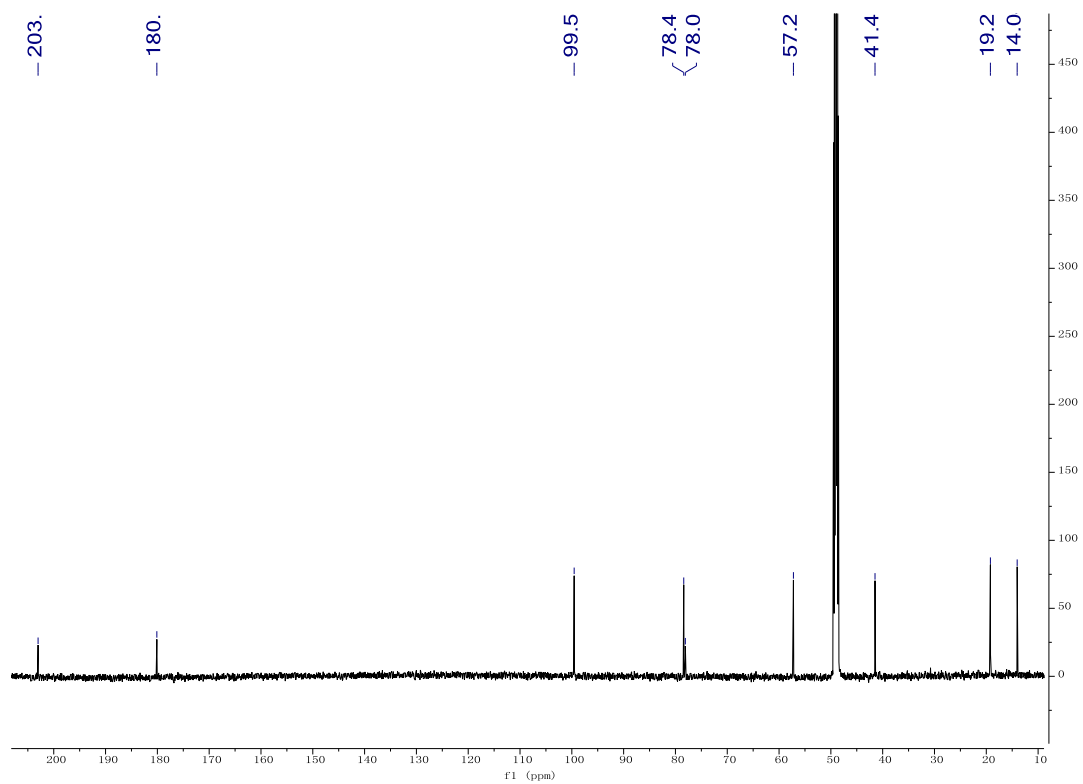

**Figure S45** <sup>13</sup>C NMR of **10**

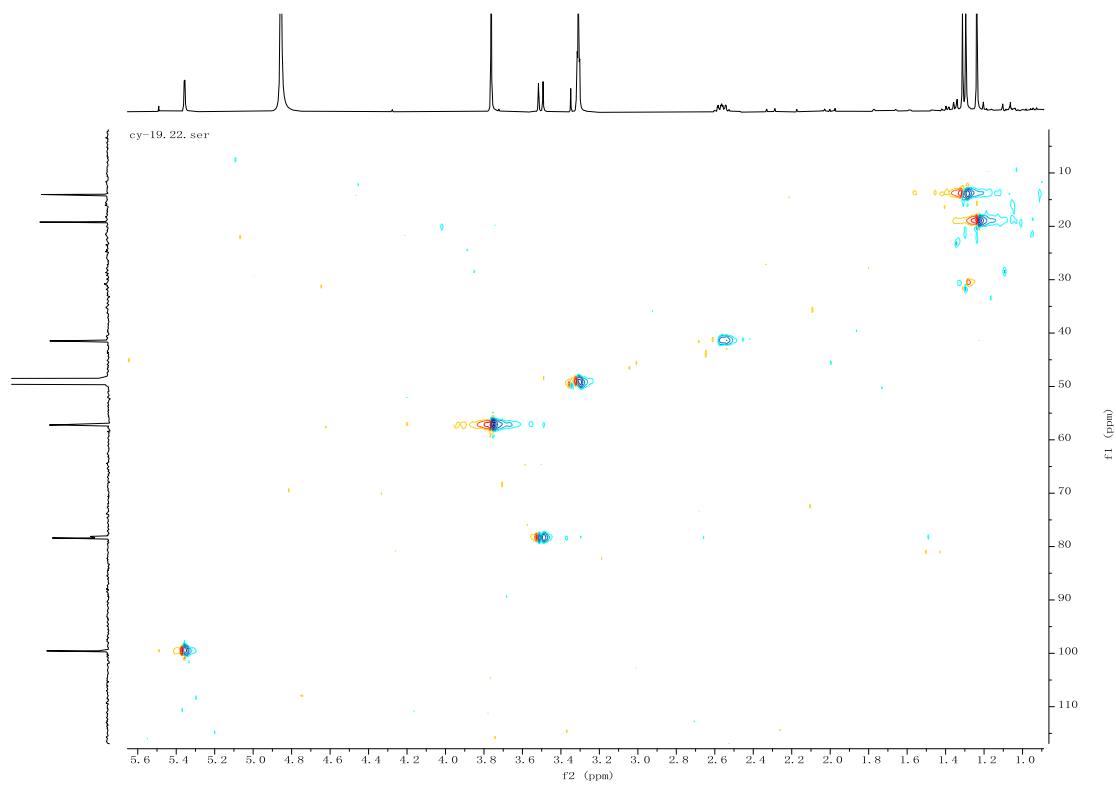

**Figure S46** HSQC spectrum of **10**

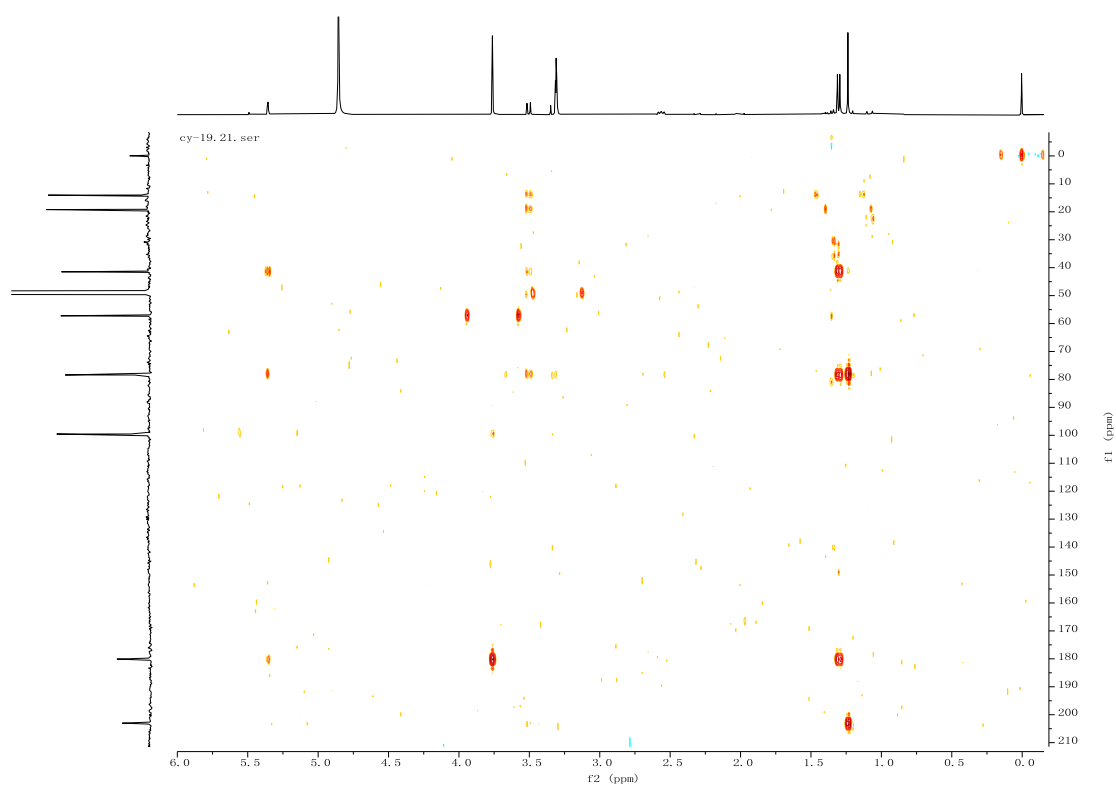

**Figure S47** HMBC spectrum of **10**

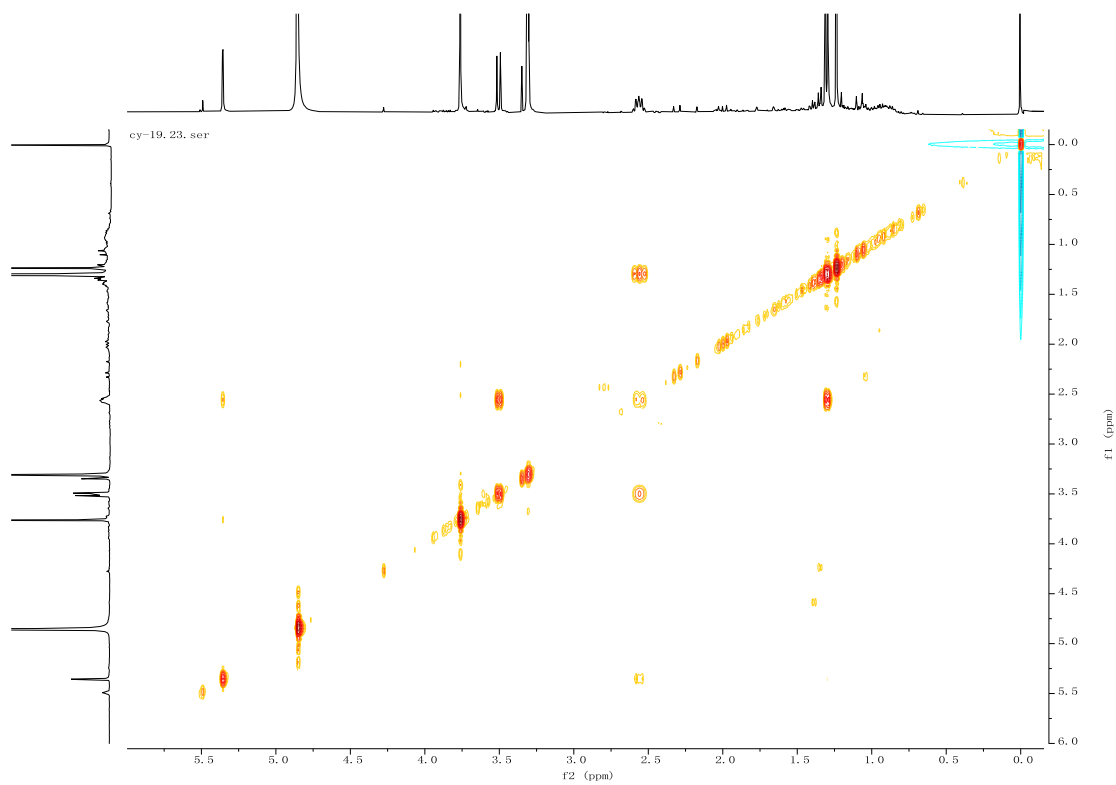

**Figure S48** COSY spectrum of **10**

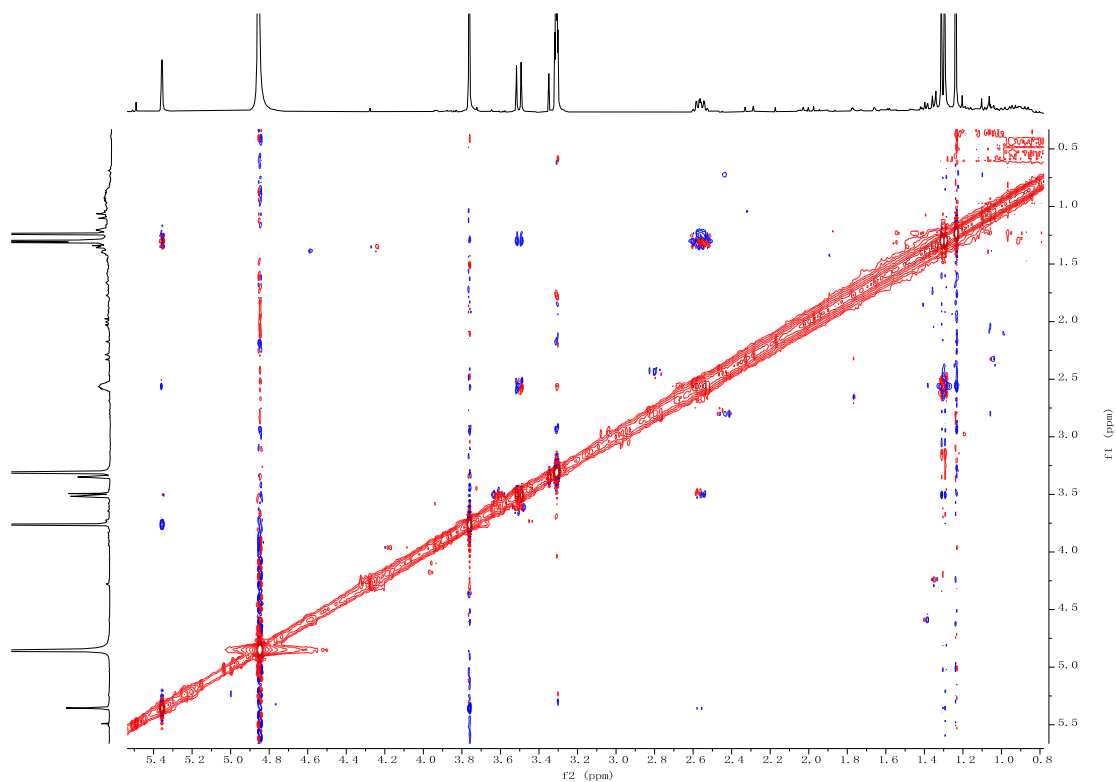

**Figure S49** NOESY spectrum of **10**

D:\Data\2021\04\Yang wencong\2104A0435-1  
LTQ Orbitrap Elite

4/9/2021 4:51:37 PM

run-19

2104A0435-1 #11-14 RT: 0.08-0.10 AV: 4 NL: 3.20E6  
T: FTMS + c ESI Full ms [100.00-1000.00]

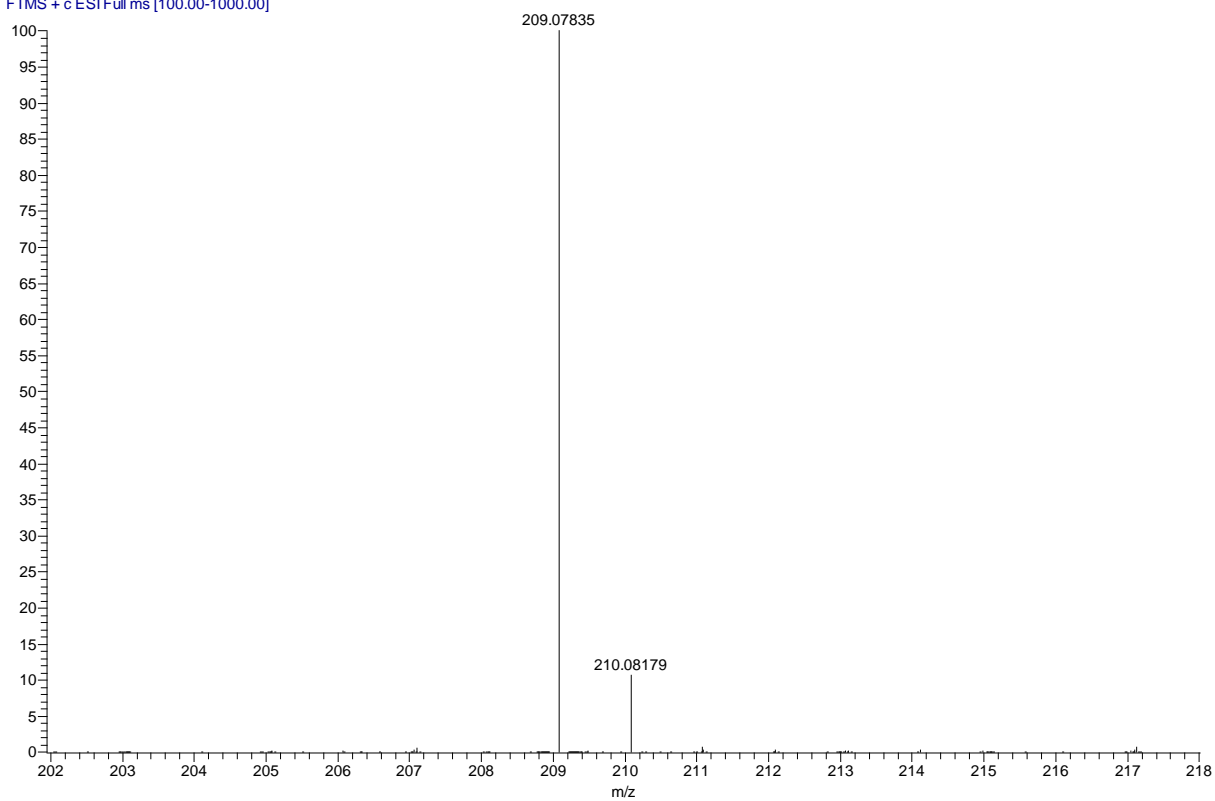

**Figure S50** HR-ESI-MS spectrum of **10**

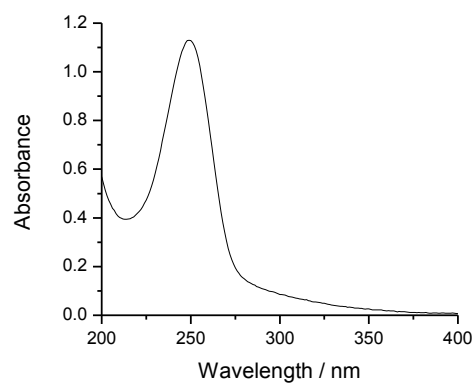

**Figure S51** UV spectrum of **10**

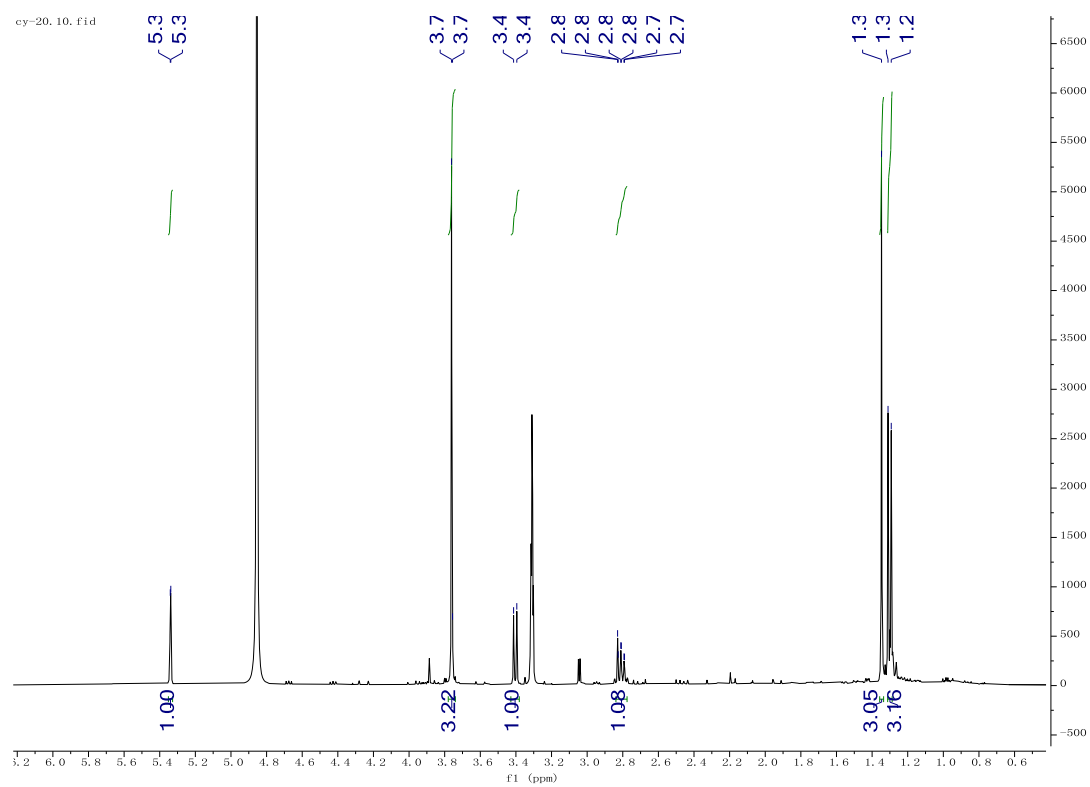

**Figure S52**  $^1\text{H}$  NMR of **11**

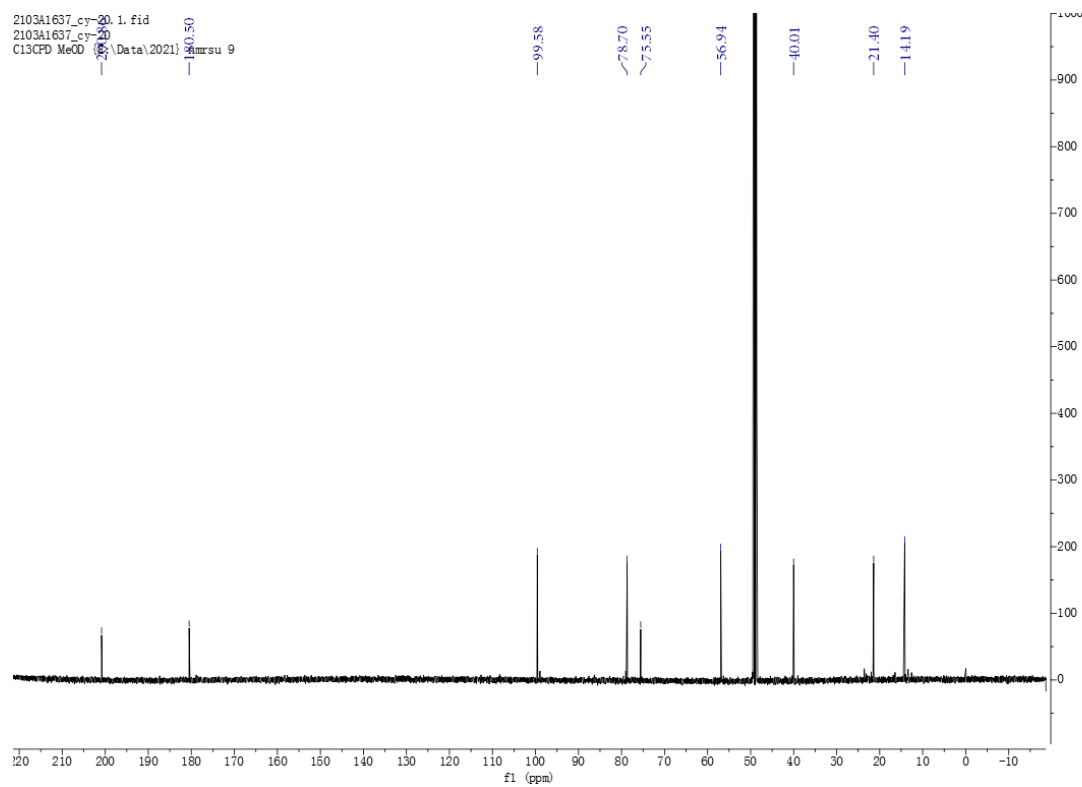

**Figure S53**  $^{13}\text{C}$  NMR of **11**

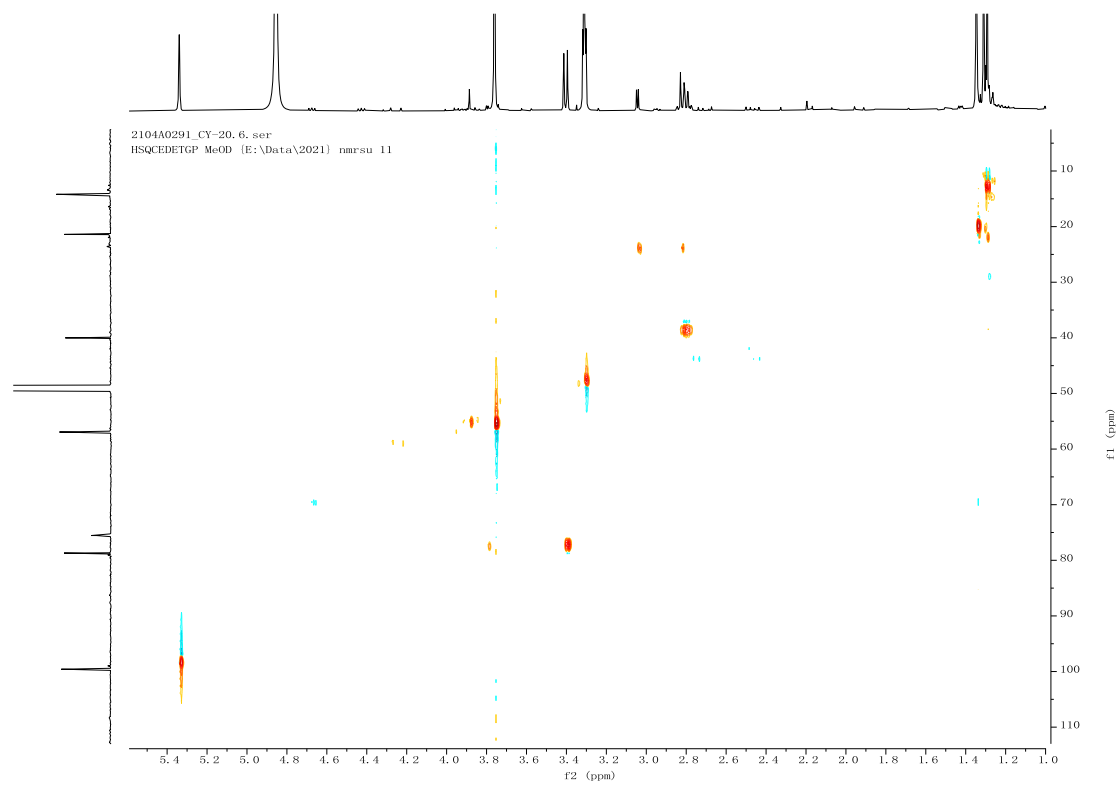

**Figure S54** HSQC spectrum of **11**

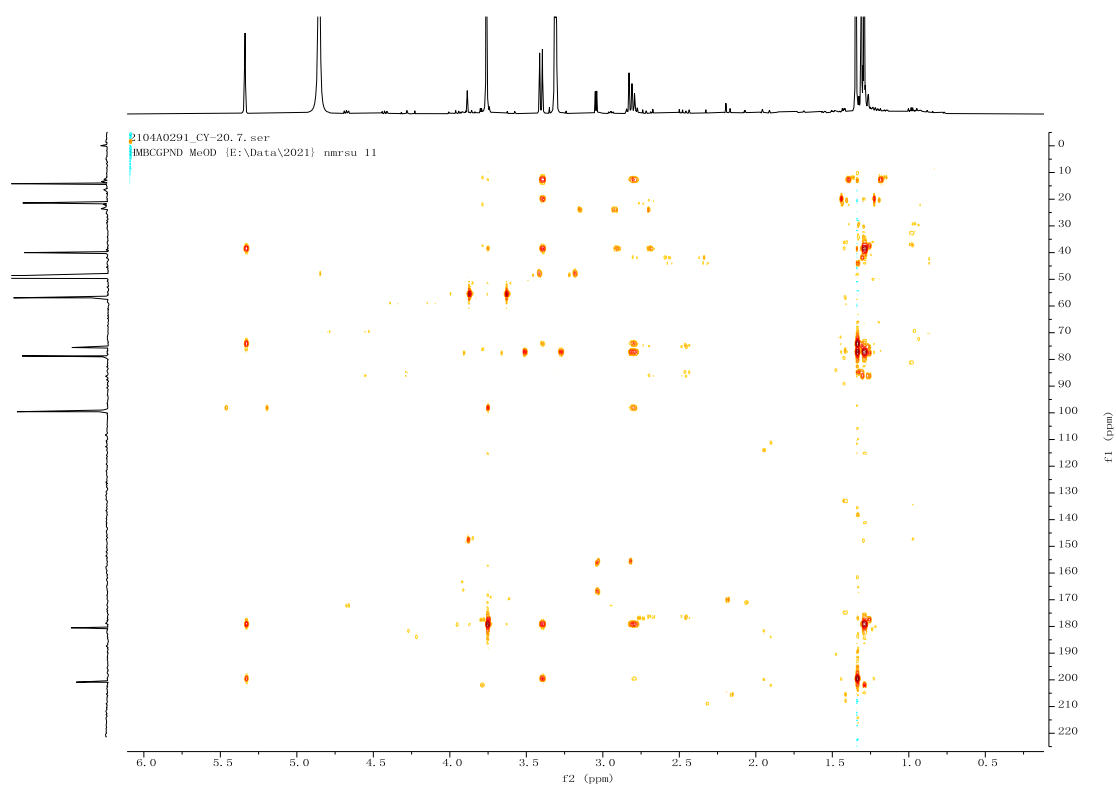

**Figure S55** HMBC spectrum of **11**

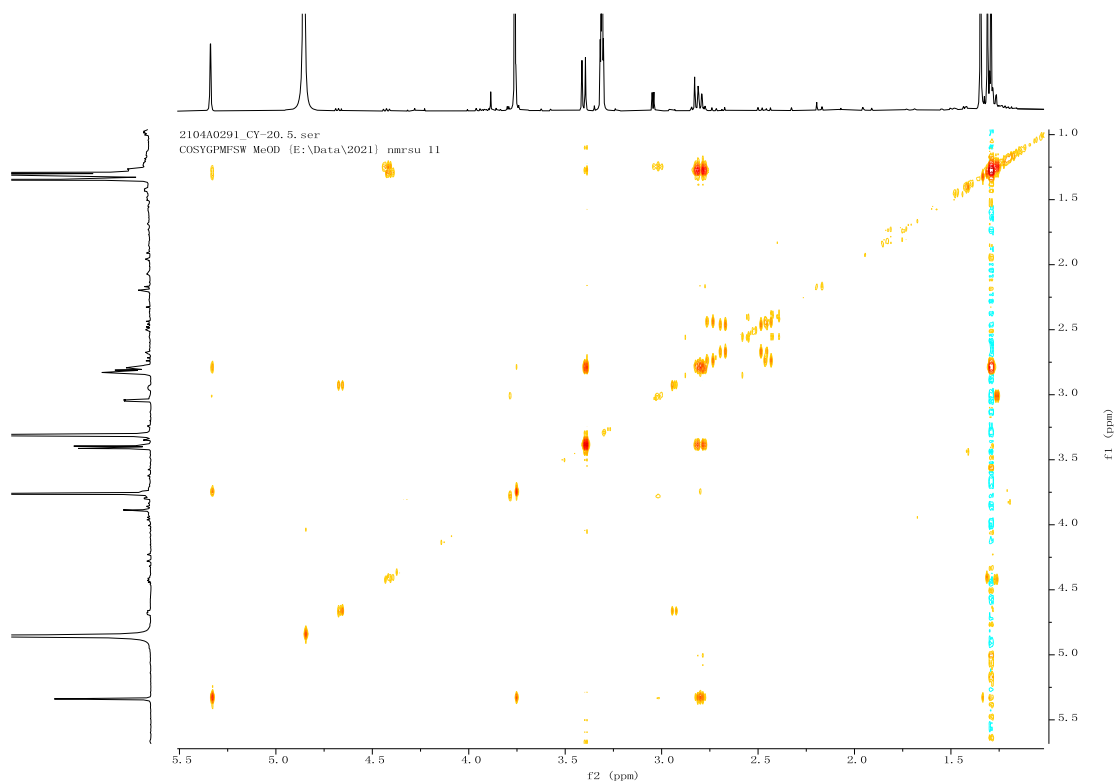

**Figure S56** COSY spectrum of **11**

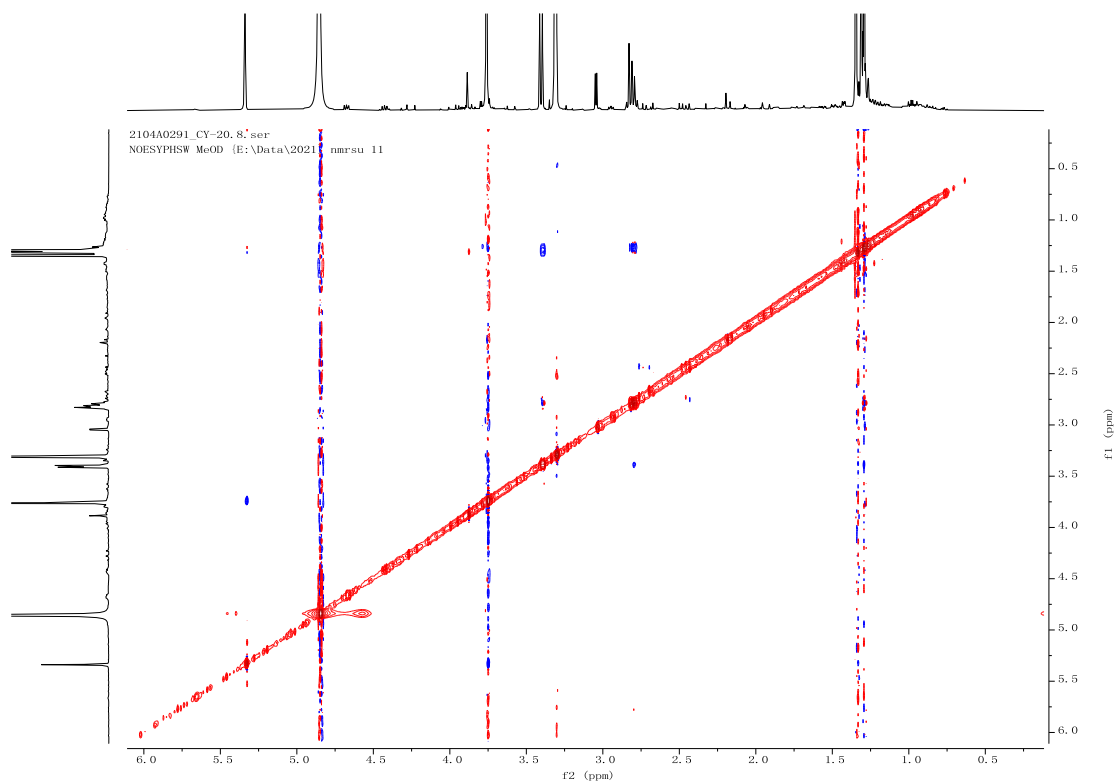

**Figure S57** NOESY spectrum of **11**

D:\Data\2021\04\Yang wencong\2104A0435-2  
LTQ Orbitrap Elite

4/9/2021 4:30:46 PM

cy-20

2104A0435-2 #28-34 RT: 0.18-0.22 AV: 7 NL: 2.03E6  
T: FTMS + c ESI Full ms [100.00-1000.00]

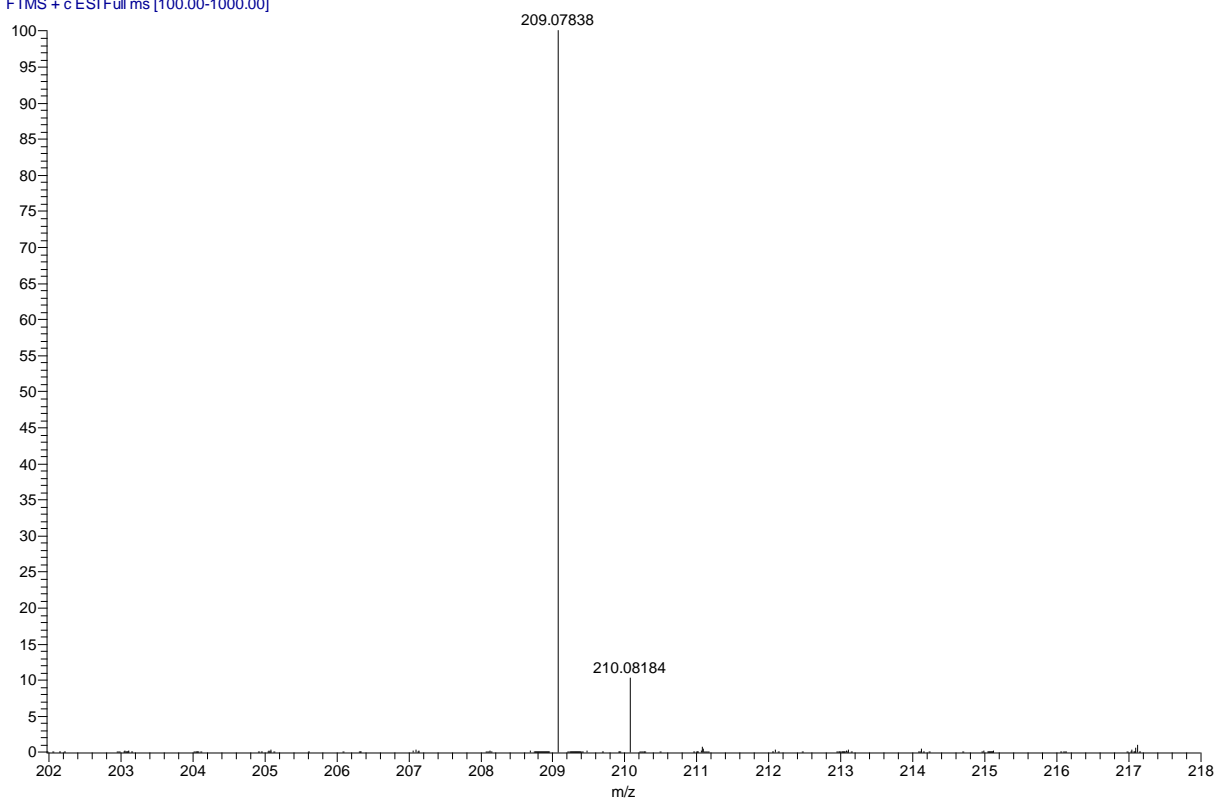

**Figure S58** HR-ESI-MS spectrum of **11**

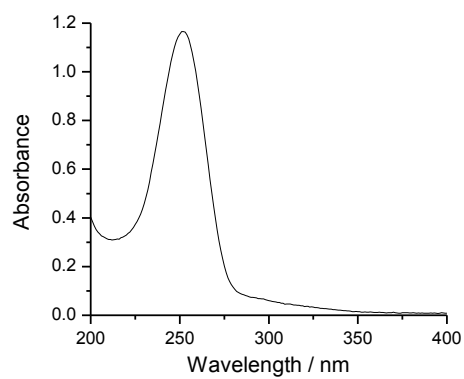

**Figure S59** UV of **11**

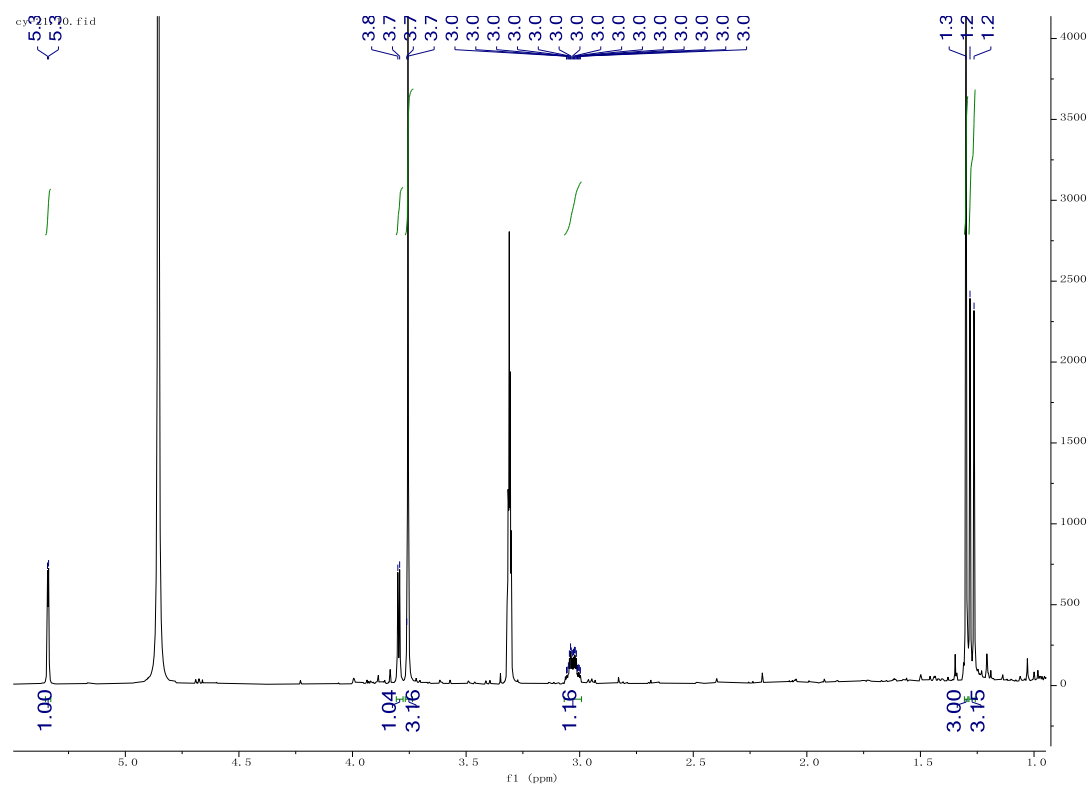

**Figure S60** <sup>1</sup>H NMR of **12**

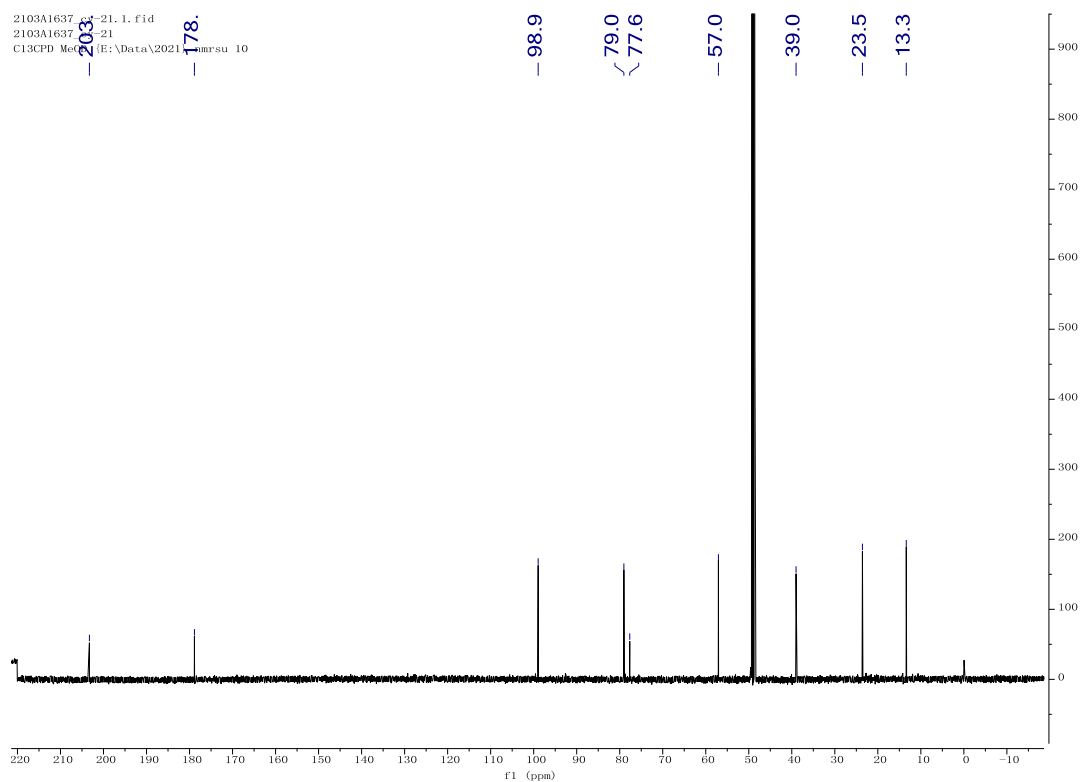

**Figure S61**  $^{13}\text{C}$  NMR of **12**

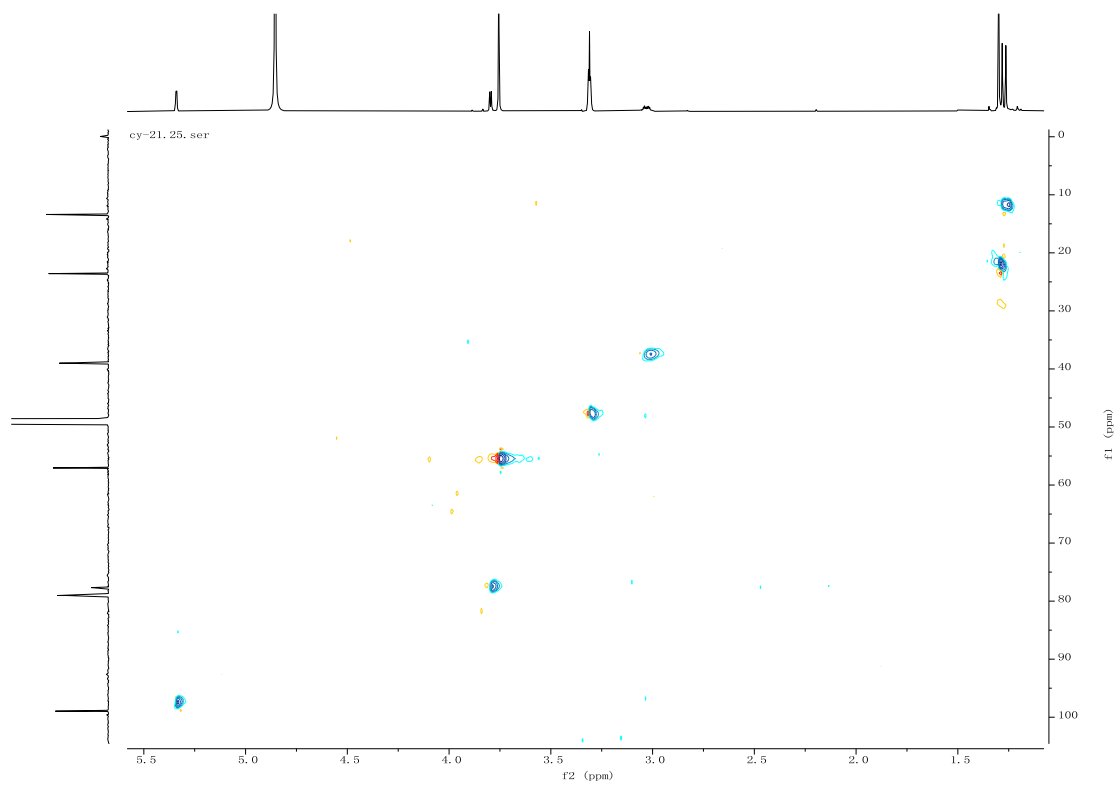

**Figure S62** HSQC spectrum of **12**

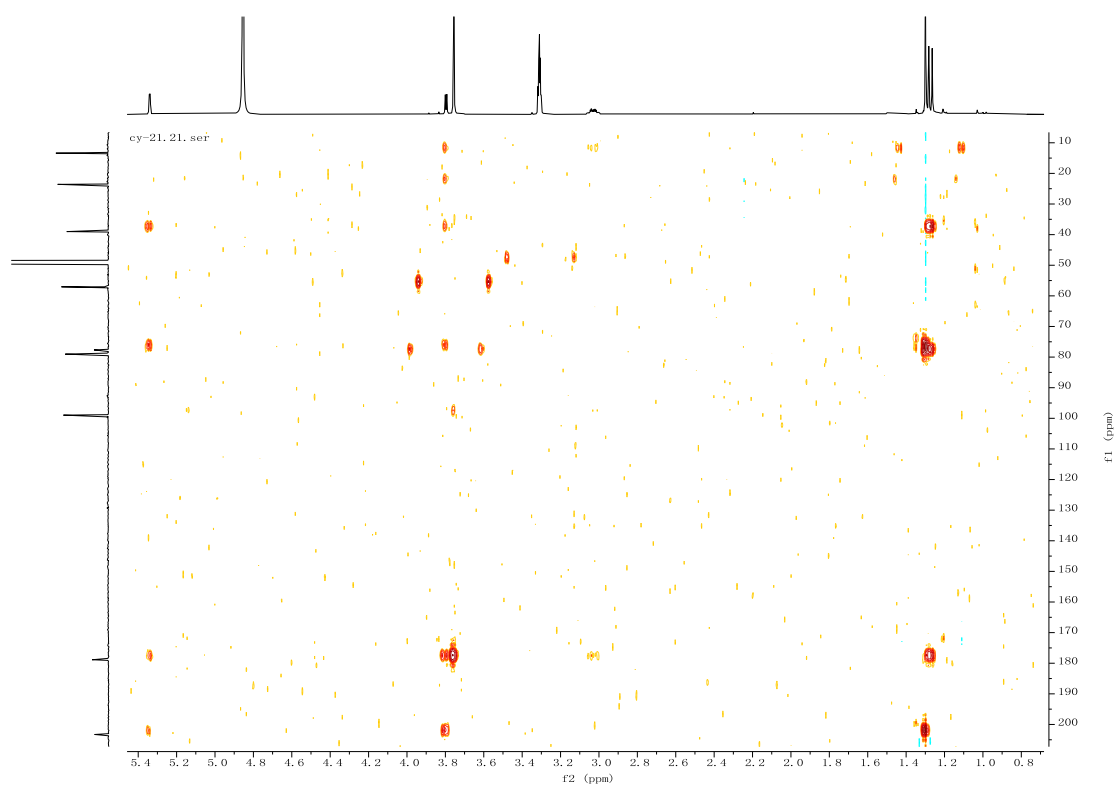

**Figure S63** HMBC spectrum of **12**

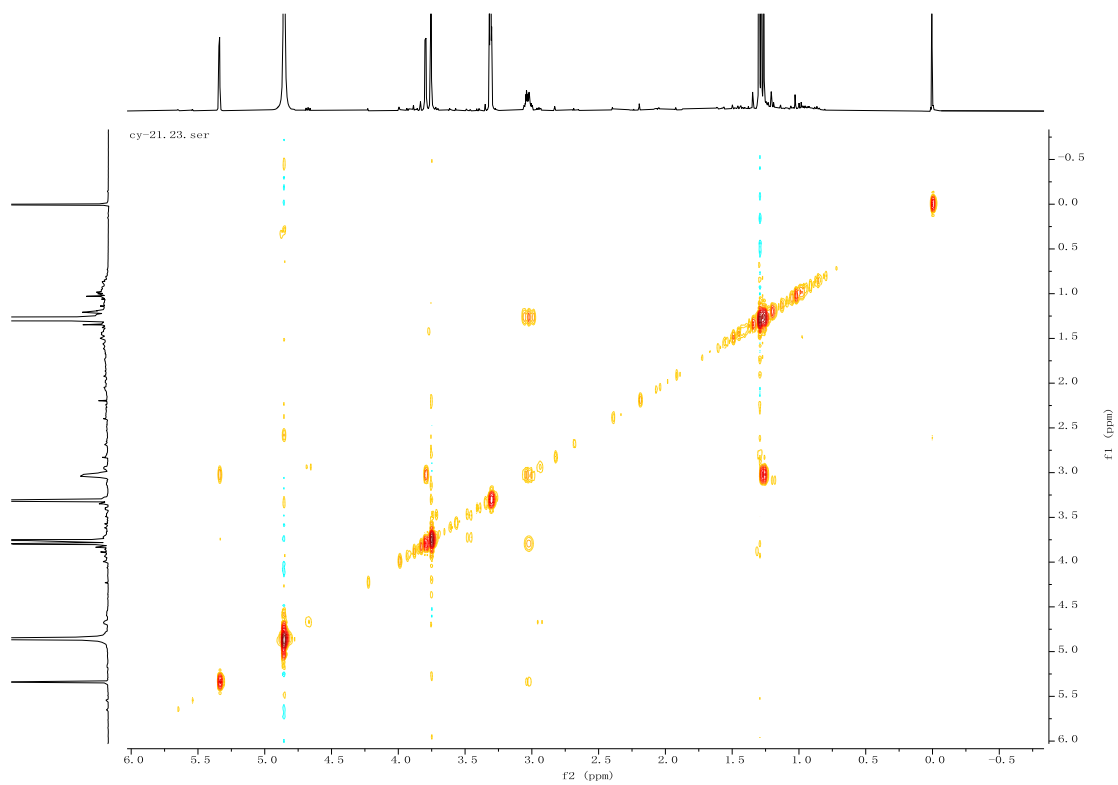

**Figure S64** COSY spectrum of **12**

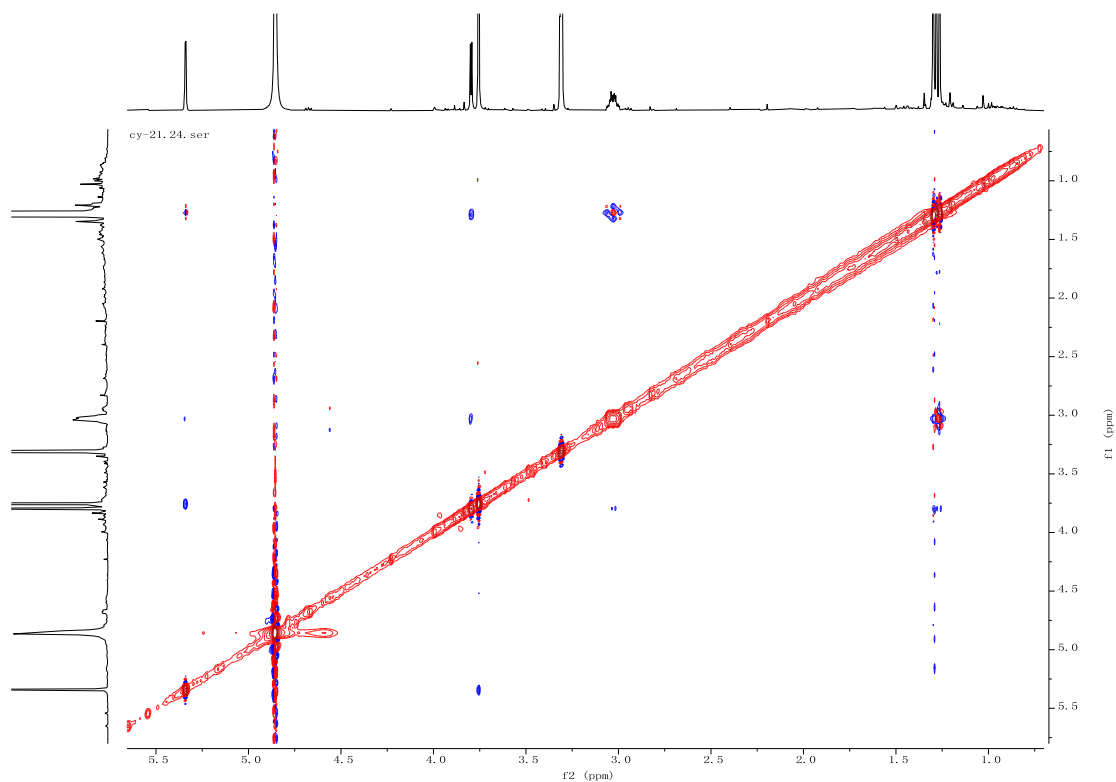

**Figure S65** NOESY spectrum of **12**

D:\Data\2021\04\Yang wencong\2104A0435-3  
LTQ Orbitrap Elite

4/9/2021 4:21:59 PM

cy-21

2104A0435-3 #24-28 RT: 0.16-0.19 AV: 5 NL: 7.46E5  
T: FTMS + c ESI Full ms [100.00-1000.00]

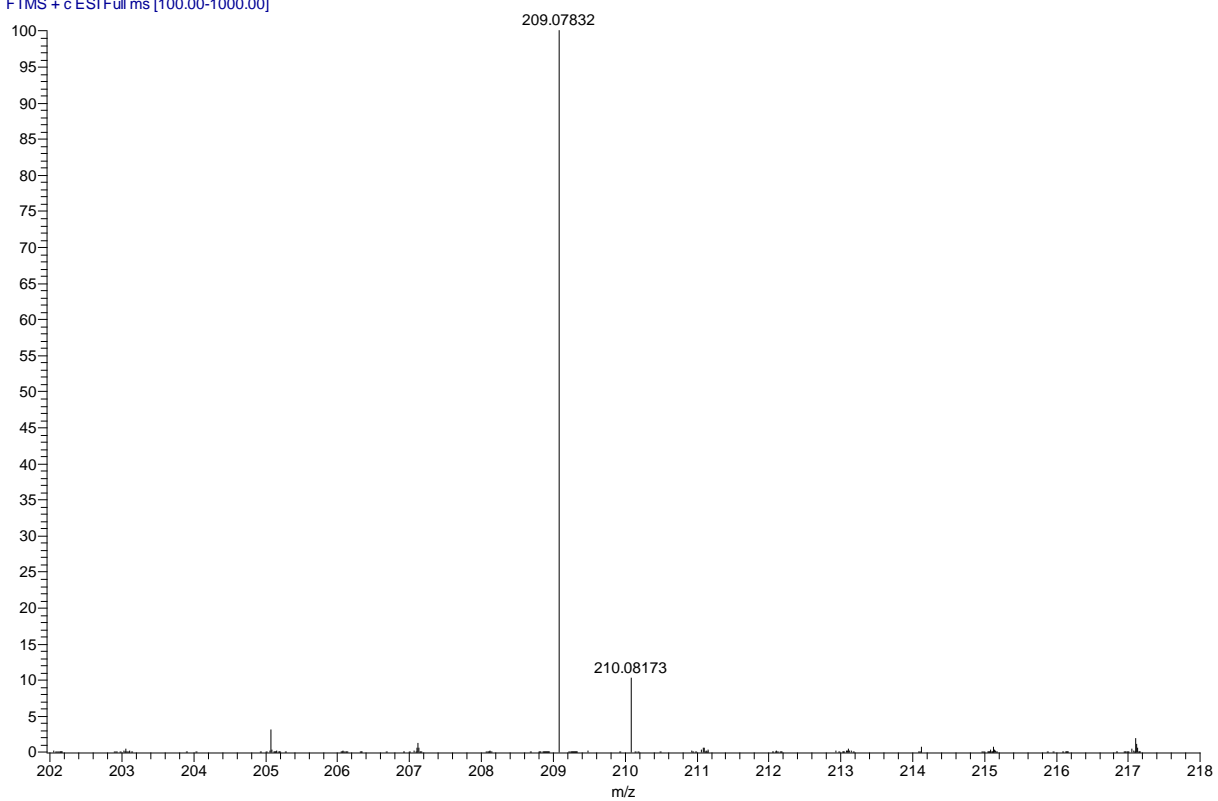

**Figure S66** HR-ESI-MS spectrum of **12**

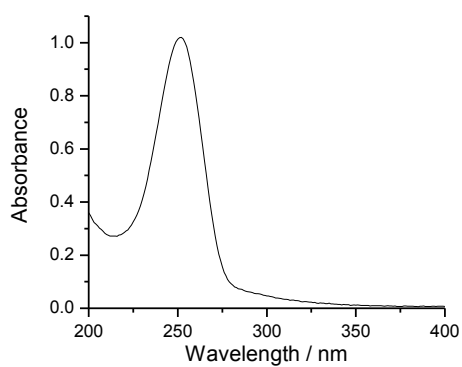

**Figure S67** UV spectrum of **12**

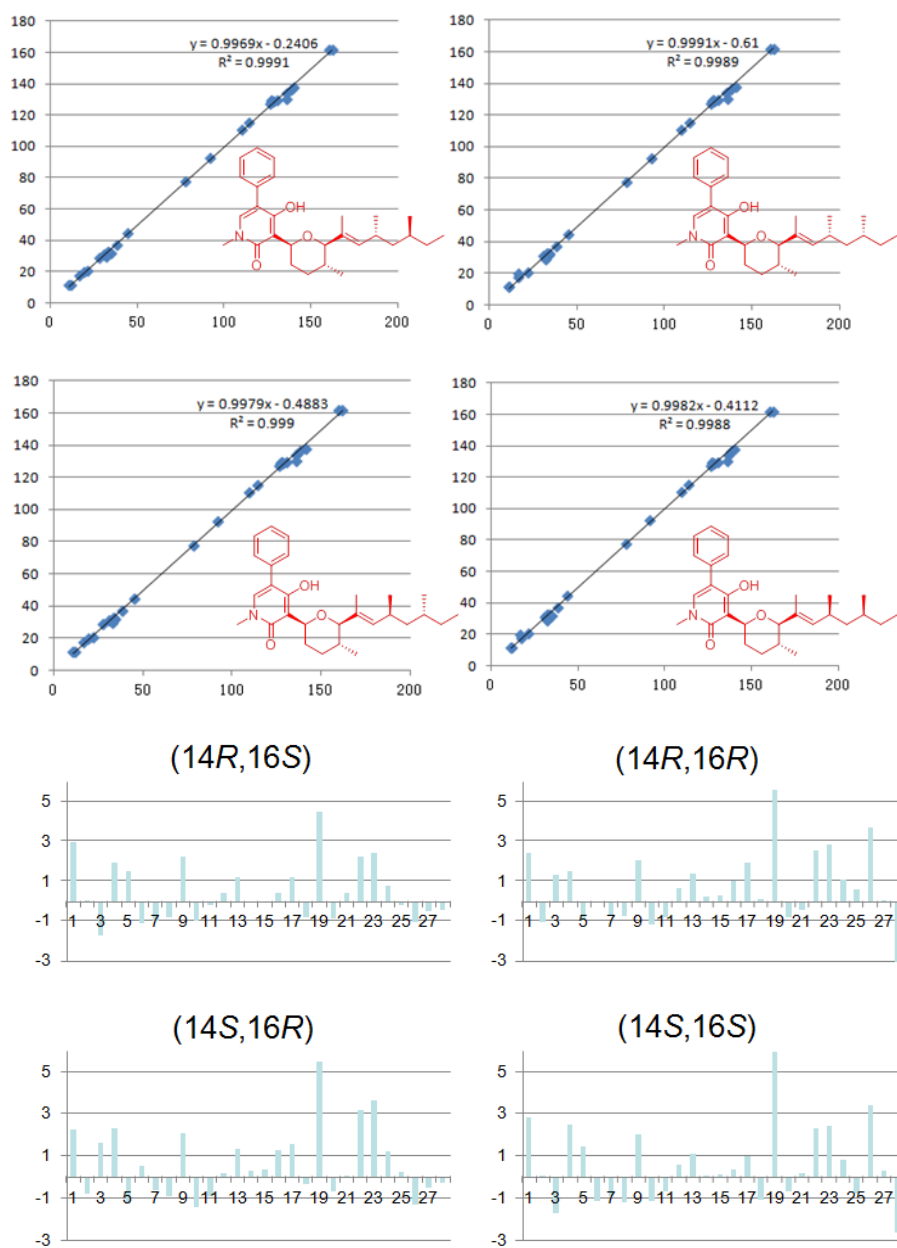

**Figure S68** Comparison of the experimental  $^{13}\text{C}$  NMR data and mean absolute error

of the 2,4,6-trimethyloct-2-ene side chain for compound **1** and the calculated chemical shifts for four 2,4,6-trimethyloct-2-ene side chain diastereomers (14*R*,16*S*-**1**, 14*R*,16*R*-**1**, 14*S*,16*R*-**1**, and 14*S*,16*S*-**1**).

| Functional       | Solvent? |          | Basis Set   |          |
|------------------|----------|----------|-------------|----------|
| mPW1PW91         | PCM      |          | 6-31+G(d,p) |          |
|                  | Isomer 1 | Isomer 2 | Isomer 3    | Isomer 4 |
| sDP4+ (H data)   | 99.91%   | 0.06%    | 0.03%       | 0.00%    |
| sDP4+ (C data)   | 5.11%    | 79.26%   | 14.07%      | 1.55%    |
| sDP4+ (all data) | 98.96%   | 0.97%    | 0.07%       | 0.00%    |
| uDP4+ (H data)   | 99.71%   | 0.21%    | 0.05%       | 0.03%    |
| uDP4+ (C data)   | 63.79%   | 1.42%    | 32.49%      | 2.30%    |
| uDP4+ (all data) | 99.97%   | 0.00%    | 0.02%       | 0.00%    |
| DP4+ (H data)    | 100.00%  | 0.00%    | 0.00%       | 0.00%    |
| DP4+ (C data)    | 36.25%   | 12.52%   | 50.83%      | 0.40%    |
| DP4+ (all data)  | 100.00%  | 0.00%    | 0.00%       | 0.00%    |

**Figure S69** DP4+ analysis of **1**.

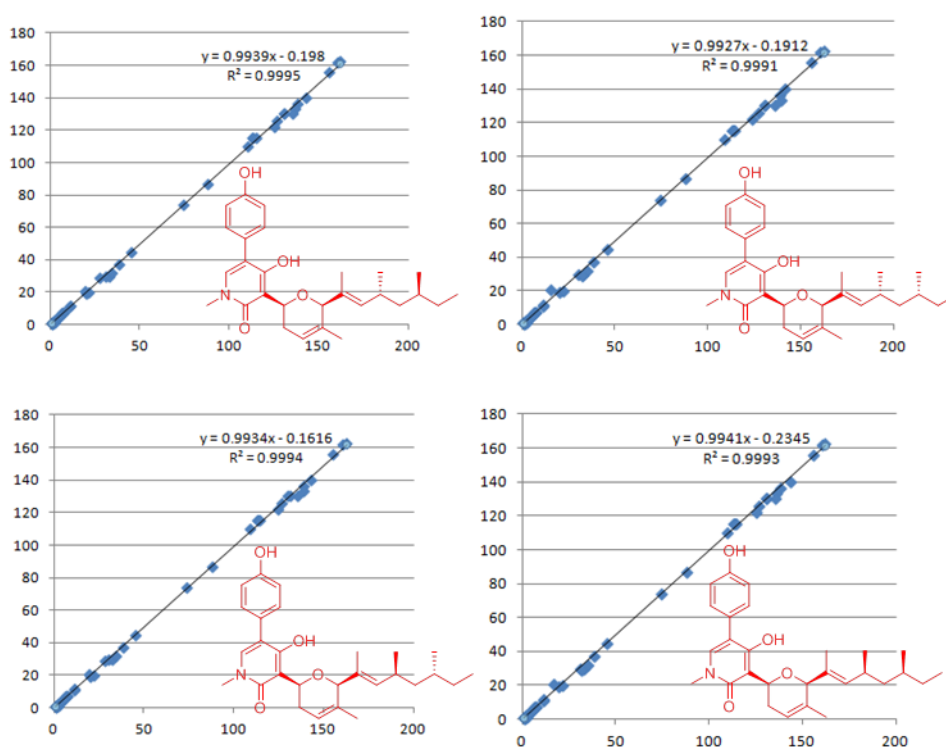

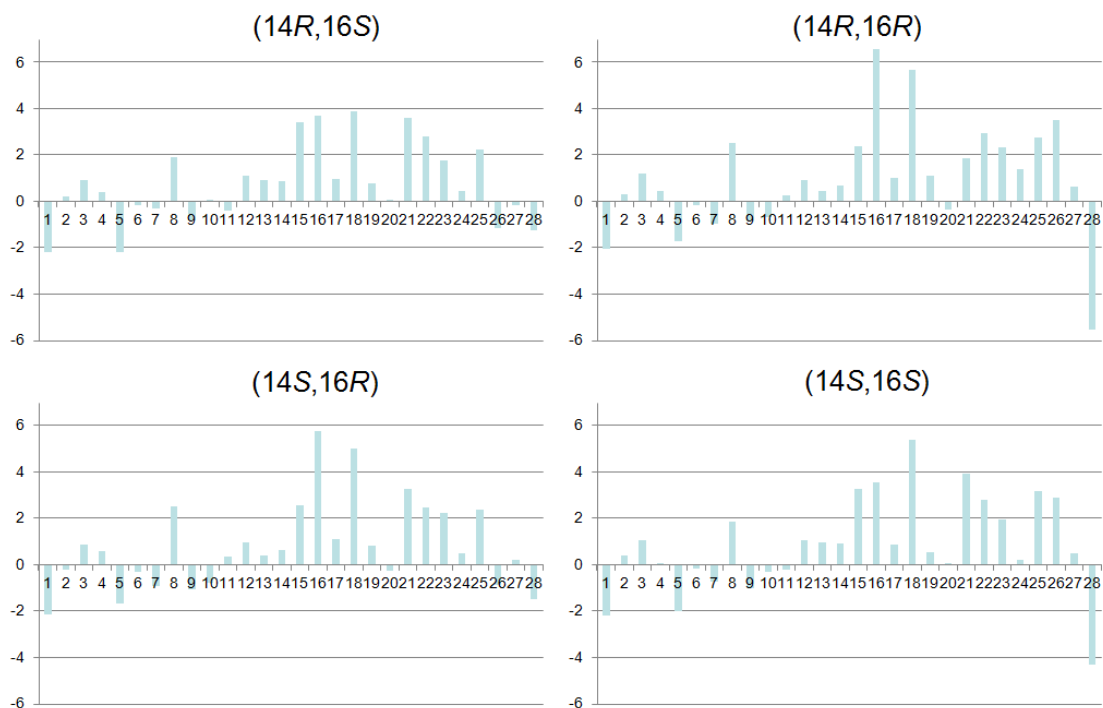

**Figure S70** Comparison of the experimental  $^{13}\text{C}$  NMR data and mean absolute error of the 2,4,6-trimethyloct-2-ene side chain for compound **2** and the calculated chemical shifts for four 2,4,6-trimethyloct-2-ene side chain diastereomers (14*R*,16*S*-**2**, 14*R*,16*R*-**2**, 14*S*,16*R*-**2**, and 14*S*,16*S*-**2**).

| A                | B        | C           | D        | E        | F |
|------------------|----------|-------------|----------|----------|---|
| Functional       | Solvent? | Basis Set   |          |          |   |
| mPW1PW91         | PCM      | 6-31+G(d,p) |          |          |   |
|                  | Isomer 1 | Isomer 2    | Isomer 3 | Isomer 4 |   |
| sDP4+ (H data)   | 15.04%   | 28.06%      | 0.06%    | 56.84%   |   |
| sDP4+ (C data)   | 82.55%   | 0.13%       | 15.99%   | 1.33%    |   |
| sDP4+ (all data) | 93.93%   | 0.28%       | 0.08%    | 5.71%    |   |
| uDP4+ (H data)   | 1.41%    | 97.14%      | 0.01%    | 1.44%    |   |
| uDP4+ (C data)   | 29.90%   | 9.50%       | 5.36%    | 55.25%   |   |
| uDP4+ (all data) | 4.03%    | 88.33%      | 0.01%    | 7.64%    |   |
| DP4+ (H data)    | 0.75%    | 96.35%      | 0.00%    | 2.90%    |   |
| DP4+ (C data)    | 93.90%   | 0.05%       | 3.26%    | 2.79%    |   |
| DP4+ (all data)  | 84.71%   | 5.54%       | 0.00%    | 9.76%    |   |

**Figure S71** DP4+ analysis of **2**.

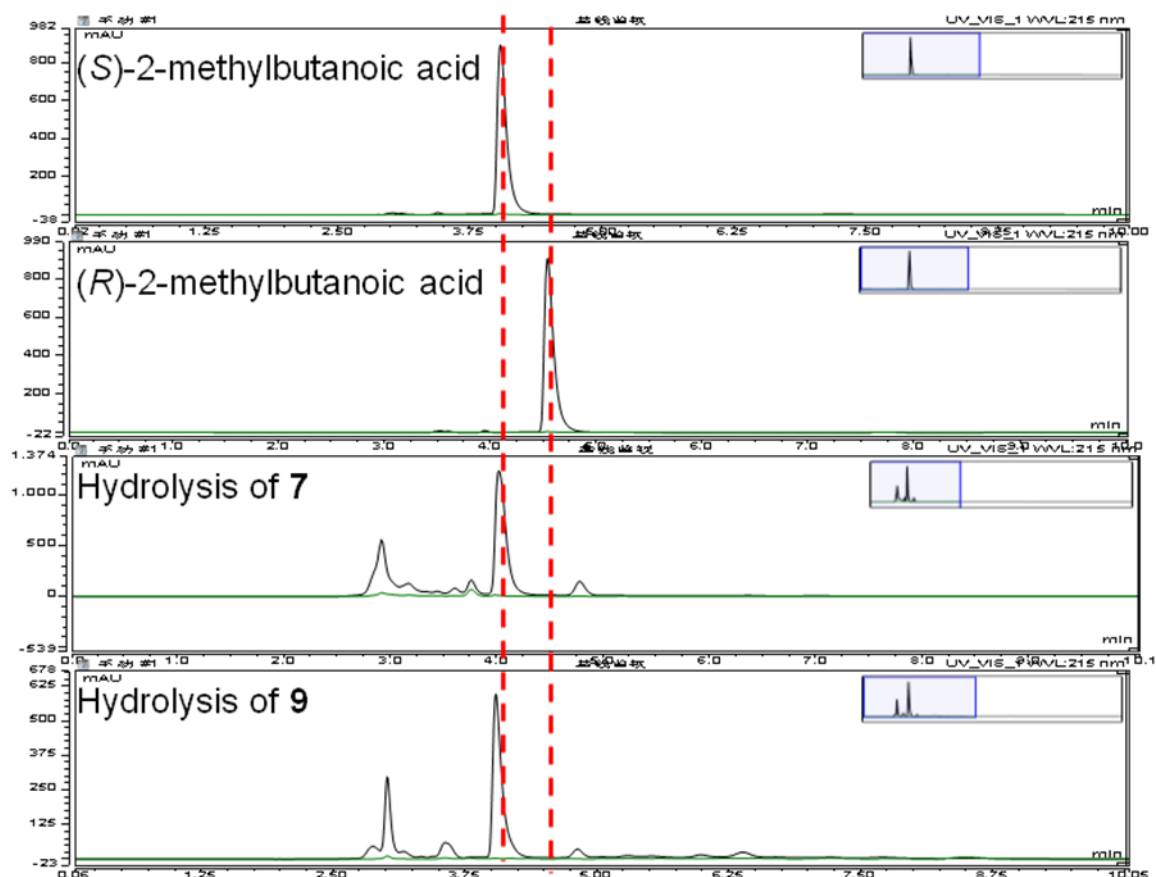

**Figure S72** Hydrolysis of **7** and **9** compared with the standard through HPLC chiral column.

**Table S1** Gibbs free energies and Boltzmann-population of low-energy conformers of **7S**, **10R**, **11R**, **13E**, **14R**, **16S** -**1**.

| Conformers of Compound | In MeOH      |                   |
|------------------------|--------------|-------------------|
|                        | $\Delta G^a$ | P(%) <sup>b</sup> |
| <b>1a</b>              | 0.00         | 67.53%            |
| <b>1b</b>              | 0.66         | 22.16%            |
| <b>1c</b>              | 1.62         | 4.35%             |
| <b>1d</b>              | 1.59         | 4.60%             |
| <b>1e</b>              | 2.31         | 1.36%             |

**Table S2** Cartesian coordinates for the low-energy optimized conformers of **7S**, **10R**, **11R**, **13E**, **14R**, **16S** -**1** at B3LYP/6-31+G (d, p) level of theory in MeOH.

**1a**

Standard orientation:

| -----  |        |        |                         |           |           |
|--------|--------|--------|-------------------------|-----------|-----------|
| Center | Atomic | Atomic | Coordinates (Angstroms) |           |           |
| Number | Number | Type   | X                       | Y         | Z         |
| -----  |        |        |                         |           |           |
| 1      | 6      | 0      | 6.171897                | 0.562445  | -0.498946 |
| 2      | 6      | 0      | -5.995176               | 2.857260  | 1.677455  |
| 3      | 6      | 0      | -5.417181               | 1.623282  | 1.372857  |
| 4      | 6      | 0      | -4.636286               | 1.472464  | 0.219231  |
| 5      | 6      | 0      | -4.434777               | 2.575755  | -0.619706 |
| 6      | 6      | 0      | -5.013534               | 3.809720  | -0.313005 |
| 7      | 6      | 0      | -5.795266               | 3.948797  | 0.833107  |
| 8      | 6      | 0      | -4.034159               | 0.165960  | -0.115141 |
| 9      | 6      | 0      | -4.857311               | -0.780335 | -0.596797 |
| 10     | 7      | 0      | -4.398828               | -2.035696 | -0.951010 |
| 11     | 6      | 0      | -3.057354               | -2.394538 | -0.848823 |
| 12     | 6      | 0      | -2.123553               | -1.365028 | -0.280889 |
| 13     | 6      | 0      | -2.622890               | -0.153364 | 0.029706  |
| 14     | 6      | 0      | -5.355163               | -2.988531 | -1.492371 |
| 15     | 6      | 0      | -0.684868               | -1.810504 | -0.152125 |
| 16     | 8      | 0      | -1.846787               | 0.879693  | 0.515326  |
| 17     | 6      | 0      | -0.494640               | -2.774388 | 1.026060  |
| 18     | 6      | 0      | 0.970795                | -3.180411 | 1.156204  |
| 19     | 6      | 0      | 1.879854                | -1.945168 | 1.225606  |
| 20     | 6      | 0      | 1.554671                | -0.997109 | 0.049802  |
| 21     | 8      | 0      | 0.159315                | -0.659754 | 0.060668  |
| 22     | 6      | 0      | 2.323166                | 0.316966  | 0.082105  |
| 23     | 6      | 0      | 3.348424                | -2.369456 | 1.248318  |
| 24     | 6      | 0      | 2.130320                | 1.168676  | 1.311483  |
| 25     | 6      | 0      | 3.114571                | 0.663381  | -0.956087 |
| 26     | 6      | 0      | 3.989307                | 1.889962  | -1.090391 |

|    |   |   |           |           |           |
|----|---|---|-----------|-----------|-----------|
| 27 | 6 | 0 | 3.392133  | 2.819458  | -2.151747 |
| 28 | 6 | 0 | 5.437364  | 1.513282  | -1.475313 |
| 29 | 6 | 0 | 6.301476  | 1.172799  | 0.909906  |
| 30 | 6 | 0 | 6.997170  | 0.262537  | 1.913845  |
| 31 | 6 | 0 | 7.543108  | 0.210831  | -1.091347 |
| 32 | 8 | 0 | -2.620004 | -3.491247 | -1.197312 |
| 33 | 1 | 0 | 5.603616  | -0.372228 | -0.423478 |
| 34 | 1 | 0 | -6.596428 | 2.968403  | 2.575308  |
| 35 | 1 | 0 | -5.571243 | 0.781771  | 2.044194  |
| 36 | 1 | 0 | -3.818171 | 2.479716  | -1.509998 |
| 37 | 1 | 0 | -4.848001 | 4.662145  | -0.967274 |
| 38 | 1 | 0 | -6.240701 | 4.910356  | 1.071732  |
| 39 | 1 | 0 | -5.919890 | -0.596503 | -0.735585 |
| 40 | 1 | 0 | -6.199519 | -3.085405 | -0.801876 |
| 41 | 1 | 0 | -5.712115 | -2.620027 | -2.459346 |
| 42 | 1 | 0 | -4.909866 | -3.977598 | -1.636088 |
| 43 | 1 | 0 | -0.373698 | -2.279503 | -1.094084 |
| 44 | 1 | 0 | -0.911818 | 0.586355  | 0.454023  |
| 45 | 1 | 0 | -0.801824 | -2.283516 | 1.959614  |
| 46 | 1 | 0 | -1.109526 | -3.673889 | 0.916011  |
| 47 | 1 | 0 | 1.102228  | -3.797309 | 2.053216  |
| 48 | 1 | 0 | 1.249960  | -3.803866 | 0.296798  |
| 49 | 1 | 0 | 1.651289  | -1.437883 | 2.172523  |
| 50 | 1 | 0 | 1.765186  | -1.516313 | -0.895644 |
| 51 | 1 | 0 | 3.533709  | -3.080224 | 2.060544  |
| 52 | 1 | 0 | 3.637274  | -2.849181 | 0.307243  |
| 53 | 1 | 0 | 4.008430  | -1.511685 | 1.408694  |
| 54 | 1 | 0 | 2.405057  | 2.214207  | 1.153691  |
| 55 | 1 | 0 | 1.080973  | 1.176930  | 1.622063  |
| 56 | 1 | 0 | 2.728587  | 0.779591  | 2.140757  |

|    |   |   |          |           |           |
|----|---|---|----------|-----------|-----------|
| 57 | 1 | 0 | 3.161737 | -0.009623 | -1.812808 |
| 58 | 1 | 0 | 4.025961 | 2.455497  | -0.155475 |
| 59 | 1 | 0 | 2.376275 | 3.125314  | -1.878983 |
| 60 | 1 | 0 | 3.995696 | 3.728007  | -2.254082 |
| 61 | 1 | 0 | 3.346304 | 2.333748  | -3.133714 |
| 62 | 1 | 0 | 5.427722 | 1.050903  | -2.472086 |
| 63 | 1 | 0 | 6.024379 | 2.436750  | -1.576888 |
| 64 | 1 | 0 | 6.841186 | 2.125791  | 0.857976  |
| 65 | 1 | 0 | 5.306338 | 1.393965  | 1.309502  |
| 66 | 1 | 0 | 8.056263 | 0.132129  | 1.672608  |
| 67 | 1 | 0 | 6.941896 | 0.699937  | 2.916433  |
| 68 | 1 | 0 | 6.522420 | -0.722899 | 1.948668  |
| 69 | 1 | 0 | 8.040544 | -0.571303 | -0.510400 |
| 70 | 1 | 0 | 7.439899 | -0.168462 | -2.114350 |
| 71 | 1 | 0 | 8.198873 | 1.087790  | -1.119796 |

**1b**

Standard orientation:

| Center | Atomic | Atomic | Coordinates (Angstroms) |          |           |
|--------|--------|--------|-------------------------|----------|-----------|
| Number | Number | Type   | X                       | Y        | Z         |
| 1      | 6      | 0      | -6.206685               | 0.218943 | 0.412042  |
| 2      | 6      | 0      | 5.895274                | 3.069869 | -1.548385 |
| 3      | 6      | 0      | 5.365993                | 1.804237 | -1.285937 |
| 4      | 6      | 0      | 4.577012                | 1.589332 | -0.147334 |
| 5      | 6      | 0      | 4.318920                | 2.660406 | 0.717448  |
| 6      | 6      | 0      | 4.848685                | 3.924366 | 0.454013  |
| 7      | 6      | 0      | 5.638380                | 4.127823 | -0.677014 |
| 8      | 6      | 0      | 4.025471                | 0.250572 | 0.142916  |

|    |   |   |           |           |           |
|----|---|---|-----------|-----------|-----------|
| 9  | 6 | 0 | 4.881890  | -0.674083 | 0.610262  |
| 10 | 7 | 0 | 4.471972  | -1.956646 | 0.923381  |
| 11 | 6 | 0 | 3.148870  | -2.368182 | 0.793643  |
| 12 | 6 | 0 | 2.180176  | -1.362900 | 0.240149  |
| 13 | 6 | 0 | 2.632214  | -0.122682 | -0.029270 |
| 14 | 6 | 0 | 5.460520  | -2.884084 | 1.452071  |
| 15 | 6 | 0 | 0.763203  | -1.863703 | 0.079789  |
| 16 | 8 | 0 | 1.818705  | 0.889413  | -0.498004 |
| 17 | 6 | 0 | 0.627429  | -2.802529 | -1.126912 |
| 18 | 6 | 0 | -0.817650 | -3.267014 | -1.287552 |
| 19 | 6 | 0 | -1.776833 | -2.069176 | -1.335573 |
| 20 | 6 | 0 | -1.507045 | -1.140266 | -0.131541 |
| 21 | 8 | 0 | -0.125819 | -0.743923 | -0.113784 |
| 22 | 6 | 0 | -2.330256 | 0.140638  | -0.140106 |
| 23 | 6 | 0 | -3.225968 | -2.554495 | -1.387938 |
| 24 | 6 | 0 | -2.153012 | 1.035854  | -1.340110 |
| 25 | 6 | 0 | -3.153321 | 0.422173  | 0.893066  |
| 26 | 6 | 0 | -4.082677 | 1.605984  | 1.045541  |
| 27 | 6 | 0 | -3.528848 | 2.546078  | 2.120523  |
| 28 | 6 | 0 | -5.511692 | 1.155988  | 1.425561  |
| 29 | 6 | 0 | -6.313375 | 0.786640  | -1.016962 |
| 30 | 6 | 0 | -7.047621 | 2.114855  | -1.137035 |
| 31 | 6 | 0 | -7.585516 | -0.184411 | 0.950466  |
| 32 | 8 | 0 | 2.752967  | -3.490719 | 1.106122  |
| 33 | 1 | 0 | -5.620025 | -0.706167 | 0.342666  |
| 34 | 1 | 0 | 6.502220  | 3.230405  | -2.434836 |
| 35 | 1 | 0 | 5.563343  | 0.989383  | -1.977968 |
| 36 | 1 | 0 | 3.695921  | 2.513553  | 1.597184  |
| 37 | 1 | 0 | 4.639857  | 4.750270  | 1.127791  |
| 38 | 1 | 0 | 6.046566  | 5.112870  | -0.884424 |

|    |   |   |           |           |           |
|----|---|---|-----------|-----------|-----------|
| 39 | 1 | 0 | 5.934423  | -0.450157 | 0.769065  |
| 40 | 1 | 0 | 6.317702  | -2.926066 | 0.771732  |
| 41 | 1 | 0 | 5.789239  | -2.527570 | 2.434168  |
| 42 | 1 | 0 | 5.055307  | -3.893818 | 1.562900  |
| 43 | 1 | 0 | 0.459668  | -2.370726 | 1.004431  |
| 44 | 1 | 0 | 0.896107  | 0.555483  | -0.457544 |
| 45 | 1 | 0 | 0.925585  | -2.273770 | -2.042355 |
| 46 | 1 | 0 | 1.279164  | -3.677634 | -1.032227 |
| 47 | 1 | 0 | -0.911736 | -3.863535 | -2.202261 |
| 48 | 1 | 0 | -1.079707 | -3.924278 | -0.448930 |
| 49 | 1 | 0 | -1.558773 | -1.527375 | -2.265730 |
| 50 | 1 | 0 | -1.707124 | -1.692833 | 0.797283  |
| 51 | 1 | 0 | -3.370883 | -3.250444 | -2.222015 |
| 52 | 1 | 0 | -3.504248 | -3.071961 | -0.463639 |
| 53 | 1 | 0 | -3.920893 | -1.721852 | -1.533215 |
| 54 | 1 | 0 | -2.711131 | 0.640630  | -2.194763 |
| 55 | 1 | 0 | -2.485714 | 2.060765  | -1.161278 |
| 56 | 1 | 0 | -1.097971 | 1.106881  | -1.624421 |
| 57 | 1 | 0 | -3.184488 | -0.276500 | 1.730504  |
| 58 | 1 | 0 | -4.147747 | 2.178618  | 0.116991  |
| 59 | 1 | 0 | -2.526773 | 2.899857  | 1.852327  |
| 60 | 1 | 0 | -4.172886 | 3.425220  | 2.233543  |
| 61 | 1 | 0 | -3.462695 | 2.049534  | 3.095055  |
| 62 | 1 | 0 | -5.476474 | 0.647583  | 2.398942  |
| 63 | 1 | 0 | -6.133696 | 2.047065  | 1.581860  |
| 64 | 1 | 0 | -5.309999 | 0.901954  | -1.442108 |
| 65 | 1 | 0 | -6.821116 | 0.051359  | -1.654153 |
| 66 | 1 | 0 | -8.078421 | 2.038866  | -0.779753 |
| 67 | 1 | 0 | -6.542730 | 2.906974  | -0.577215 |
| 68 | 1 | 0 | -7.083715 | 2.425145  | -2.186786 |

|    |   |   |           |           |          |
|----|---|---|-----------|-----------|----------|
| 69 | 1 | 0 | -7.485043 | -0.716439 | 1.902591 |
| 70 | 1 | 0 | -8.224953 | 0.687242  | 1.123007 |
| 71 | 1 | 0 | -8.098022 | -0.851587 | 0.250338 |

1c

Standard orientation:

| Center | Atomic | Atomic | Coordinates (Angstroms) |           |           |
|--------|--------|--------|-------------------------|-----------|-----------|
| Number | Number | Type   | X                       | Y         | Z         |
| 1      | 6      | 0      | -2.448814               | 2.799775  | -0.363496 |
| 2      | 6      | 0      | 4.377782                | 3.245276  | -1.518706 |
| 3      | 6      | 0      | 4.058952                | 1.894059  | -1.359875 |
| 4      | 6      | 0      | 3.439384                | 1.446722  | -0.185034 |
| 5      | 6      | 0      | 3.136824                | 2.372749  | 0.822475  |
| 6      | 6      | 0      | 3.453709                | 3.722958  | 0.660611  |
| 7      | 6      | 0      | 4.075905                | 4.157002  | -0.509189 |
| 8      | 6      | 0      | 3.103882                | 0.019385  | -0.006359 |
| 9      | 6      | 0      | 4.123061                | -0.832403 | 0.200150  |
| 10     | 7      | 0      | 3.916766                | -2.186014 | 0.391788  |
| 11     | 6      | 0      | 2.645366                | -2.753589 | 0.400866  |
| 12     | 6      | 0      | 1.492900                | -1.825968 | 0.147806  |
| 13     | 6      | 0      | 1.751951                | -0.514258 | -0.020546 |
| 14     | 6      | 0      | 5.077853                | -3.030513 | 0.631796  |
| 15     | 6      | 0      | 0.131730                | -2.482263 | 0.140758  |
| 16     | 8      | 0      | 0.765517                | 0.428449  | -0.230147 |
| 17     | 6      | 0      | -0.119431               | -3.245024 | -1.164969 |
| 18     | 6      | 0      | -1.527587               | -3.831304 | -1.183294 |
| 19     | 6      | 0      | -2.579539               | -2.746822 | -0.901802 |
| 20     | 6      | 0      | -2.205814               | -1.989408 | 0.393365  |

|    |   |   |           |           |           |
|----|---|---|-----------|-----------|-----------|
| 21 | 8 | 0 | -0.875200 | -1.464012 | 0.278895  |
| 22 | 6 | 0 | -3.050318 | -0.784748 | 0.796279  |
| 23 | 6 | 0 | -3.970093 | -3.380150 | -0.825435 |
| 24 | 6 | 0 | -3.014343 | -0.516254 | 2.281695  |
| 25 | 6 | 0 | -3.708933 | -0.012043 | -0.095572 |
| 26 | 6 | 0 | -4.500852 | 1.253118  | 0.153600  |
| 27 | 6 | 0 | -5.962542 | 1.012604  | -0.238123 |
| 28 | 6 | 0 | -3.927217 | 2.438944  | -0.655703 |
| 29 | 6 | 0 | -2.252811 | 3.279540  | 1.088508  |
| 30 | 6 | 0 | -0.801620 | 3.576396  | 1.446803  |
| 31 | 6 | 0 | -1.989628 | 3.861172  | -1.371577 |
| 32 | 8 | 0 | 2.434394  | -3.948662 | 0.603131  |
| 33 | 1 | 0 | -1.828200 | 1.911162  | -0.526110 |
| 34 | 1 | 0 | 4.853596  | 3.585747  | -2.434597 |
| 35 | 1 | 0 | 4.286391  | 1.195596  | -2.160441 |
| 36 | 1 | 0 | 2.640252  | 2.045133  | 1.732898  |
| 37 | 1 | 0 | 3.208600  | 4.433648  | 1.444705  |
| 38 | 1 | 0 | 4.318539  | 5.209517  | -0.635899 |
| 39 | 1 | 0 | 5.154994  | -0.491575 | 0.233430  |
| 40 | 1 | 0 | 5.800565  | -2.888045 | -0.177146 |
| 41 | 1 | 0 | 5.533320  | -2.742384 | 1.585455  |
| 42 | 1 | 0 | 4.810030  | -4.089445 | 0.677553  |
| 43 | 1 | 0 | 0.046807  | -3.150520 | 1.007569  |
| 44 | 1 | 0 | -0.098086 | -0.020323 | -0.100420 |
| 45 | 1 | 0 | -0.018984 | -2.562699 | -2.019049 |
| 46 | 1 | 0 | 0.611107  | -4.049266 | -1.305462 |
| 47 | 1 | 0 | -1.717459 | -4.298248 | -2.157177 |
| 48 | 1 | 0 | -1.597002 | -4.627235 | -0.429711 |
| 49 | 1 | 0 | -2.548975 | -2.057205 | -1.754370 |
| 50 | 1 | 0 | -2.225321 | -2.709603 | 1.224608  |

|    |   |   |           |           |           |
|----|---|---|-----------|-----------|-----------|
| 51 | 1 | 0 | -4.189002 | -3.939997 | -1.740906 |
| 52 | 1 | 0 | -4.042038 | -4.075010 | 0.018819  |
| 53 | 1 | 0 | -4.752384 | -2.625861 | -0.708336 |
| 54 | 1 | 0 | -3.345417 | -1.404508 | 2.830890  |
| 55 | 1 | 0 | -1.992655 | -0.277007 | 2.596002  |
| 56 | 1 | 0 | -3.658010 | 0.303542  | 2.600996  |
| 57 | 1 | 0 | -3.648022 | -0.271591 | -1.150883 |
| 58 | 1 | 0 | -4.502252 | 1.527858  | 1.210203  |
| 59 | 1 | 0 | -6.394375 | 0.191430  | 0.344492  |
| 60 | 1 | 0 | -6.566065 | 1.907348  | -0.048615 |
| 61 | 1 | 0 | -6.061348 | 0.760608  | -1.300333 |
| 62 | 1 | 0 | -4.027684 | 2.213428  | -1.725981 |
| 63 | 1 | 0 | -4.550451 | 3.325197  | -0.473150 |
| 64 | 1 | 0 | -2.856561 | 4.175814  | 1.272048  |
| 65 | 1 | 0 | -2.607127 | 2.512502  | 1.783757  |
| 66 | 1 | 0 | -0.719777 | 3.804325  | 2.513716  |
| 67 | 1 | 0 | -0.162346 | 2.713845  | 1.235861  |
| 68 | 1 | 0 | -0.417129 | 4.439954  | 0.896286  |
| 69 | 1 | 0 | -2.180734 | 3.531801  | -2.398650 |
| 70 | 1 | 0 | -2.516042 | 4.808937  | -1.217171 |
| 71 | 1 | 0 | -0.914329 | 4.049306  | -1.292596 |

-----

1d

Standard orientation:

-----

| Center | Atomic | Atomic | Coordinates (Angstroms) |          |           |
|--------|--------|--------|-------------------------|----------|-----------|
| Number | Number | Type   | X                       | Y        | Z         |
| -----  |        |        |                         |          |           |
| 1      | 6      | 0      | -1.782853               | 2.991962 | 0.413738  |
| 2      | 6      | 0      | 4.614193                | 2.728450 | -1.870819 |

|    |   |   |           |           |           |
|----|---|---|-----------|-----------|-----------|
| 3  | 6 | 0 | 4.200771  | 1.432017  | -1.557877 |
| 4  | 6 | 0 | 3.438837  | 1.189233  | -0.407230 |
| 5  | 6 | 0 | 3.089859  | 2.265911  | 0.418497  |
| 6  | 6 | 0 | 3.502383  | 3.561647  | 0.104249  |
| 7  | 6 | 0 | 4.267108  | 3.792026  | -1.038631 |
| 8  | 6 | 0 | 3.001814  | -0.181807 | -0.064242 |
| 9  | 6 | 0 | 3.949504  | -1.052983 | 0.320197  |
| 10 | 7 | 0 | 3.644546  | -2.353047 | 0.679132  |
| 11 | 6 | 0 | 2.339886  | -2.838785 | 0.687610  |
| 12 | 6 | 0 | 1.266333  | -1.892085 | 0.236114  |
| 13 | 6 | 0 | 1.621305  | -0.634523 | -0.093187 |
| 14 | 6 | 0 | 4.731967  | -3.220155 | 1.109209  |
| 15 | 6 | 0 | -0.133153 | -2.462383 | 0.236313  |
| 16 | 8 | 0 | 0.710456  | 0.325083  | -0.489710 |
| 17 | 6 | 0 | -0.364640 | -3.404668 | -0.950912 |
| 18 | 6 | 0 | -1.803866 | -3.915660 | -0.958874 |
| 19 | 6 | 0 | -2.803268 | -2.751690 | -0.902921 |
| 20 | 6 | 0 | -2.442838 | -1.815394 | 0.271534  |
| 21 | 8 | 0 | -1.079545 | -1.379904 | 0.151559  |
| 22 | 6 | 0 | -3.289424 | -0.550339 | 0.336813  |
| 23 | 6 | 0 | -4.232095 | -3.286068 | -0.812146 |
| 24 | 6 | 0 | -4.204169 | -0.479241 | 1.529079  |
| 25 | 6 | 0 | -3.166352 | 0.419966  | -0.595973 |
| 26 | 6 | 0 | -3.842557 | 1.770573  | -0.649180 |
| 27 | 6 | 0 | -4.782866 | 1.813535  | -1.858105 |
| 28 | 6 | 0 | -2.802153 | 2.909737  | -0.749026 |
| 29 | 6 | 0 | -2.471510 | 3.303296  | 1.757043  |
| 30 | 6 | 0 | -1.515750 | 3.332093  | 2.942283  |
| 31 | 6 | 0 | -0.717393 | 4.040657  | 0.068592  |
| 32 | 8 | 0 | 2.039911  | -3.977588 | 1.041982  |

|    |   |   |           |           |           |
|----|---|---|-----------|-----------|-----------|
| 33 | 1 | 0 | -1.268640 | 2.028236  | 0.505755  |
| 34 | 1 | 0 | 5.201774  | 2.909238  | -2.767364 |
| 35 | 1 | 0 | 4.467122  | 0.613112  | -2.222495 |
| 36 | 1 | 0 | 2.482985  | 2.098913  | 1.306404  |
| 37 | 1 | 0 | 3.220414  | 4.390802  | 0.748106  |
| 38 | 1 | 0 | 4.583655  | 4.802100  | -1.285896 |
| 39 | 1 | 0 | 4.997738  | -0.770363 | 0.375325  |
| 40 | 1 | 0 | 5.517903  | -3.219665 | 0.347051  |
| 41 | 1 | 0 | 5.135251  | -2.839499 | 2.052507  |
| 42 | 1 | 0 | 4.396075  | -4.249702 | 1.261513  |
| 43 | 1 | 0 | -0.309632 | -2.981005 | 1.188184  |
| 44 | 1 | 0 | -0.184325 | -0.049551 | -0.337899 |
| 45 | 1 | 0 | -0.184475 | -2.867504 | -1.891486 |
| 46 | 1 | 0 | 0.322230  | -4.256228 | -0.926552 |
| 47 | 1 | 0 | -1.973690 | -4.517047 | -1.859914 |
| 48 | 1 | 0 | -1.954420 | -4.580150 | -0.098527 |
| 49 | 1 | 0 | -2.702235 | -2.198918 | -1.846394 |
| 50 | 1 | 0 | -2.534798 | -2.356480 | 1.222430  |
| 51 | 1 | 0 | -4.437226 | -3.982687 | -1.631920 |
| 52 | 1 | 0 | -4.398020 | -3.817941 | 0.131119  |
| 53 | 1 | 0 | -4.965558 | -2.475784 | -0.880408 |
| 54 | 1 | 0 | -3.614971 | -0.403568 | 2.449170  |
| 55 | 1 | 0 | -4.894898 | 0.364915  | 1.502906  |
| 56 | 1 | 0 | -4.817962 | -1.384548 | 1.587246  |
| 57 | 1 | 0 | -2.466555 | 0.246015  | -1.415492 |
| 58 | 1 | 0 | -4.457599 | 1.945367  | 0.236377  |
| 59 | 1 | 0 | -5.544282 | 1.028612  | -1.791002 |
| 60 | 1 | 0 | -5.301691 | 2.776547  | -1.909821 |
| 61 | 1 | 0 | -4.237568 | 1.675224  | -2.799382 |
| 62 | 1 | 0 | -2.249132 | 2.797108  | -1.692488 |

|    |   |   |           |          |           |
|----|---|---|-----------|----------|-----------|
| 63 | 1 | 0 | -3.333511 | 3.868058 | -0.823300 |
| 64 | 1 | 0 | -2.996904 | 4.265147 | 1.695920  |
| 65 | 1 | 0 | -3.230328 | 2.543090 | 1.969168  |
| 66 | 1 | 0 | -0.932760 | 2.407885 | 2.999572  |
| 67 | 1 | 0 | -0.825440 | 4.177850 | 2.883951  |
| 68 | 1 | 0 | -2.080380 | 3.433745 | 3.875860  |
| 69 | 1 | 0 | -0.265889 | 3.828101 | -0.907089 |
| 70 | 1 | 0 | -1.149438 | 5.046069 | 0.030237  |
| 71 | 1 | 0 | 0.094328  | 4.043191 | 0.801171  |

1e

Standard orientation:

| Center<br>Number | Atomic<br>Number | Atomic<br>Type | Coordinates (Angstroms) |           |           |
|------------------|------------------|----------------|-------------------------|-----------|-----------|
|                  |                  |                | X                       | Y         | Z         |
| 1                | 6                | 0              | -2.133828               | 2.699193  | 0.476493  |
| 2                | 6                | 0              | 4.281313                | 3.327150  | -1.775445 |
| 3                | 6                | 0              | 4.052916                | 1.983553  | -1.469613 |
| 4                | 6                | 0              | 3.312579                | 1.629651  | -0.332604 |
| 5                | 6                | 0              | 2.797258                | 2.643853  | 0.486371  |
| 6                | 6                | 0              | 3.023995                | 3.986178  | 0.179264  |
| 7                | 6                | 0              | 3.767894                | 4.327661  | -0.949995 |
| 8                | 6                | 0              | 3.071726                | 0.209473  | 0.001517  |
| 9                | 6                | 0              | 4.128978                | -0.520254 | 0.393602  |
| 10               | 7                | 0              | 4.007803                | -1.852365 | 0.744439  |
| 11               | 6                | 0              | 2.785624                | -2.518724 | 0.736125  |
| 12               | 6                | 0              | 1.593762                | -1.731508 | 0.276092  |
| 13               | 6                | 0              | 1.769181                | -0.434759 | -0.043438 |
| 14               | 6                | 0              | 5.202406                | -2.558971 | 1.182458  |

|    |   |   |           |           |           |
|----|---|---|-----------|-----------|-----------|
| 15 | 6 | 0 | 0.288574  | -2.494658 | 0.258295  |
| 16 | 8 | 0 | 0.735838  | 0.388184  | -0.445127 |
| 17 | 6 | 0 | 0.206248  | -3.451786 | -0.936631 |
| 18 | 6 | 0 | -1.145566 | -4.159919 | -0.966640 |
| 19 | 6 | 0 | -2.299808 | -3.148465 | -0.917534 |
| 20 | 6 | 0 | -2.090366 | -2.180186 | 0.267043  |
| 21 | 8 | 0 | -0.800090 | -1.557131 | 0.167963  |
| 22 | 6 | 0 | -3.108330 | -1.048285 | 0.327579  |
| 23 | 6 | 0 | -3.639985 | -3.879895 | -0.852423 |
| 24 | 6 | 0 | -4.059308 | -1.130957 | 1.491010  |
| 25 | 6 | 0 | -3.096942 | -0.051349 | -0.585011 |
| 26 | 6 | 0 | -3.953485 | 1.192313  | -0.638255 |
| 27 | 6 | 0 | -4.879182 | 1.111373  | -1.855436 |
| 28 | 6 | 0 | -3.079126 | 2.463952  | -0.723602 |
| 29 | 6 | 0 | -2.848237 | 2.816491  | 1.837471  |
| 30 | 6 | 0 | -3.897712 | 3.914714  | 1.929485  |
| 31 | 6 | 0 | -1.252106 | 3.923287  | 0.205513  |
| 32 | 8 | 0 | 2.646986  | -3.691578 | 1.081815  |
| 33 | 1 | 0 | -1.453479 | 1.841277  | 0.551584  |
| 34 | 1 | 0 | 4.851538  | 3.593139  | -2.660600 |
| 35 | 1 | 0 | 4.446631  | 1.213764  | -2.129418 |
| 36 | 1 | 0 | 2.204910  | 2.388818  | 1.361955  |
| 37 | 1 | 0 | 2.614573  | 4.764212  | 0.816790  |
| 38 | 1 | 0 | 3.940602  | 5.373352  | -1.191260 |
| 39 | 1 | 0 | 5.126219  | -0.093175 | 0.461304  |
| 40 | 1 | 0 | 5.986625  | -2.445472 | 0.427236  |
| 41 | 1 | 0 | 5.540694  | -2.127111 | 2.129751  |
| 42 | 1 | 0 | 5.014485  | -3.625897 | 1.330622  |
| 43 | 1 | 0 | 0.177759  | -3.039869 | 1.205001  |
| 44 | 1 | 0 | -0.098824 | -0.109398 | -0.302079 |

|    |   |   |           |           |           |
|----|---|---|-----------|-----------|-----------|
| 45 | 1 | 0 | 0.321260  | -2.887610 | -1.871646 |
| 46 | 1 | 0 | 1.006873  | -4.199046 | -0.908119 |
| 47 | 1 | 0 | -1.217733 | -4.772611 | -1.872982 |
| 48 | 1 | 0 | -1.212047 | -4.845606 | -0.111615 |
| 49 | 1 | 0 | -2.264806 | -2.578819 | -1.855792 |
| 50 | 1 | 0 | -2.116469 | -2.735772 | 1.214195  |
| 51 | 1 | 0 | -3.733254 | -4.592583 | -1.677836 |
| 52 | 1 | 0 | -3.743328 | -4.435757 | 0.086555  |
| 53 | 1 | 0 | -4.478643 | -3.181125 | -0.928128 |
| 54 | 1 | 0 | -3.514948 | -0.989876 | 2.430266  |
| 55 | 1 | 0 | -4.861533 | -0.392361 | 1.452834  |
| 56 | 1 | 0 | -4.539650 | -2.114837 | 1.516704  |
| 57 | 1 | 0 | -2.358898 | -0.110470 | -1.387902 |
| 58 | 1 | 0 | -4.591202 | 1.275217  | 0.244772  |
| 59 | 1 | 0 | -5.522120 | 0.226306  | -1.800545 |
| 60 | 1 | 0 | -5.529376 | 1.991752  | -1.906711 |
| 61 | 1 | 0 | -4.312159 | 1.058500  | -2.791656 |
| 62 | 1 | 0 | -2.471275 | 2.415106  | -1.639356 |
| 63 | 1 | 0 | -3.730172 | 3.338345  | -0.850913 |
| 64 | 1 | 0 | -3.320075 | 1.860475  | 2.088546  |
| 65 | 1 | 0 | -2.096179 | 2.989907  | 2.617627  |
| 66 | 1 | 0 | -3.468320 | 4.900850  | 1.732632  |
| 67 | 1 | 0 | -4.719498 | 3.746128  | 1.227430  |
| 68 | 1 | 0 | -4.325503 | 3.936022  | 2.937071  |
| 69 | 1 | 0 | -0.638313 | 3.764479  | -0.688289 |
| 70 | 1 | 0 | -1.848831 | 4.826093  | 0.040321  |
| 71 | 1 | 0 | -0.572875 | 4.109653  | 1.043240  |

---

**Table S3** Gibbs free energies and Boltzmann-population of low-energy conformers of 7*S*, 11*R*, 13*E*, 14*R*, 16*S* -2.

| Conformers of Compound | In MeOH      |                   |
|------------------------|--------------|-------------------|
|                        | $\Delta G^a$ | P(%) <sup>b</sup> |
| <b>2a</b>              | 0.03         | 35.42%            |
| <b>2b</b>              | 0.00         | 37.45%            |
| <b>2c</b>              | 0.70         | 11.45%            |
| <b>2d</b>              | 0.66         | 12.27%            |
| <b>2e</b>              | 2.01         | 1.25%             |
| <b>2f</b>              | 2.10         | 1.08%             |
| <b>2g</b>              | 2.10         | 1.08%             |

**Table S4** Cartesian coordinates for the low-energy optimized conformers of *7S*, *11R*, *13E*, *14R*, *16S* -**2** at B3LYP/6-31+G (d, p) level of theory in MeOH.

**2a**

Standard orientation:

| Center<br>Number | Atomic<br>Number | Atomic<br>Type | Coordinates (Angstroms) |           |           |
|------------------|------------------|----------------|-------------------------|-----------|-----------|
|                  |                  |                | X                       | Y         | Z         |
| 1                | 6                | 0              | -4.984870               | 3.248073  | -0.626945 |
| 2                | 6                | 0              | -4.341056               | 2.025107  | -0.831953 |
| 3                | 6                | 0              | -4.490613               | 0.977666  | 0.089301  |
| 4                | 6                | 0              | -5.289565               | 1.175454  | 1.224900  |
| 5                | 6                | 0              | -5.935531               | 2.396739  | 1.428664  |
| 6                | 6                | 0              | -5.778843               | 3.421307  | 0.501845  |
| 7                | 6                | 0              | -3.815599               | -0.316127 | -0.140768 |
| 8                | 6                | 0              | -4.592144               | -1.364222 | -0.463103 |
| 9                | 7                | 0              | -4.063897               | -2.617393 | -0.707150 |
| 10               | 6                | 0              | -2.697710               | -2.875928 | -0.647620 |
| 11               | 6                | 0              | -1.810329               | -1.726115 | -0.266916 |
| 12               | 6                | 0              | -2.378054               | -0.522109 | -0.057006 |

|    |   |   |           |           |           |
|----|---|---|-----------|-----------|-----------|
| 13 | 6 | 0 | -4.979165 | -3.690106 | -1.069771 |
| 14 | 6 | 0 | -0.337596 | -2.058270 | -0.188569 |
| 15 | 8 | 0 | -1.652794 | 0.607691  | 0.265406  |
| 16 | 6 | 0 | -0.008105 | -2.875909 | 1.075336  |
| 17 | 6 | 0 | 1.475294  | -3.019781 | 1.249180  |
| 18 | 6 | 0 | 2.335657  | -2.210145 | 0.604507  |
| 19 | 6 | 0 | 1.843755  | -1.072628 | -0.281136 |
| 20 | 8 | 0 | 0.429546  | -0.838474 | -0.142453 |
| 21 | 6 | 0 | 2.519869  | 0.257619  | 0.027573  |
| 22 | 6 | 0 | 3.821654  | -2.424563 | 0.689793  |
| 23 | 6 | 0 | 2.268370  | 0.814082  | 1.408644  |
| 24 | 6 | 0 | 3.278624  | 0.865805  | -0.910663 |
| 25 | 6 | 0 | 4.061330  | 2.154416  | -0.791423 |
| 26 | 6 | 0 | 3.400059  | 3.226366  | -1.665236 |
| 27 | 6 | 0 | 5.534686  | 1.964377  | -1.218524 |
| 28 | 6 | 0 | 6.335432  | 0.899497  | -0.430062 |
| 29 | 6 | 0 | 6.415335  | 1.237063  | 1.072141  |
| 30 | 6 | 0 | 7.183618  | 0.210191  | 1.894404  |
| 31 | 6 | 0 | 7.730960  | 0.769144  | -1.055743 |
| 32 | 8 | 0 | -6.424675 | 4.597444  | 0.741478  |
| 33 | 8 | 0 | -2.201275 | -3.974735 | -0.889979 |
| 34 | 1 | 0 | -4.851373 | 4.043723  | -1.351341 |
| 35 | 1 | 0 | -3.712276 | 1.891071  | -1.709136 |
| 36 | 1 | 0 | -5.406872 | 0.383530  | 1.960476  |
| 37 | 1 | 0 | -6.552219 | 2.550037  | 2.309558  |
| 38 | 1 | 0 | -5.671614 | -1.269951 | -0.552480 |
| 39 | 1 | 0 | -4.466331 | -4.650505 | -1.163148 |
| 40 | 1 | 0 | -5.751375 | -3.779943 | -0.299715 |
| 41 | 1 | 0 | -5.444949 | -3.446274 | -2.029917 |
| 42 | 1 | 0 | -0.044791 | -2.599896 | -1.097964 |

|    |   |   |           |           |           |
|----|---|---|-----------|-----------|-----------|
| 43 | 1 | 0 | -0.702319 | 0.367308  | 0.206029  |
| 44 | 1 | 0 | -0.407081 | -2.385897 | 1.972043  |
| 45 | 1 | 0 | -0.457669 | -3.872852 | 1.014758  |
| 46 | 1 | 0 | 1.828533  | -3.822115 | 1.892008  |
| 47 | 1 | 0 | 2.022645  | -1.357084 | -1.326468 |
| 48 | 1 | 0 | 4.071347  | -3.344852 | 1.228862  |
| 49 | 1 | 0 | 4.251636  | -2.506581 | -0.314156 |
| 50 | 1 | 0 | 4.309426  | -1.596358 | 1.212490  |
| 51 | 1 | 0 | 1.200522  | 0.800601  | 1.646002  |
| 52 | 1 | 0 | 2.793814  | 0.219165  | 2.163204  |
| 53 | 1 | 0 | 2.589866  | 1.851498  | 1.522037  |
| 54 | 1 | 0 | 3.369364  | 0.384113  | -1.885076 |
| 55 | 1 | 0 | 4.054511  | 2.532468  | 0.233301  |
| 56 | 1 | 0 | 3.392656  | 2.937232  | -2.721982 |
| 57 | 1 | 0 | 2.363048  | 3.399053  | -1.354801 |
| 58 | 1 | 0 | 3.934924  | 4.177730  | -1.581328 |
| 59 | 1 | 0 | 5.560087  | 1.700836  | -2.285413 |
| 60 | 1 | 0 | 6.051070  | 2.930025  | -1.133992 |
| 61 | 1 | 0 | 5.838188  | -0.071662 | -0.542706 |
| 62 | 1 | 0 | 6.875763  | 2.223053  | 1.211593  |
| 63 | 1 | 0 | 5.406202  | 1.297168  | 1.490536  |
| 64 | 1 | 0 | 6.792191  | -0.798740 | 1.730838  |
| 65 | 1 | 0 | 8.250365  | 0.216085  | 1.650705  |
| 66 | 1 | 0 | 7.090794  | 0.440957  | 2.961441  |
| 67 | 1 | 0 | 7.658179  | 0.586889  | -2.133309 |
| 68 | 1 | 0 | 8.319525  | 1.680755  | -0.905676 |
| 69 | 1 | 0 | 8.283997  | -0.071705 | -0.626403 |
| 70 | 1 | 0 | -6.191693 | 5.225449  | 0.038460  |

Standard orientation:

| -----  |        |        |                         |           |           |
|--------|--------|--------|-------------------------|-----------|-----------|
| Center | Atomic | Atomic | Coordinates (Angstroms) |           |           |
| Number | Number | Type   | X                       | Y         | Z         |
| -----  |        |        |                         |           |           |
| 1      | 6      | 0      | -5.739236               | 2.871343  | -0.792752 |
| 2      | 6      | 0      | -5.089559               | 1.653775  | -1.003377 |
| 3      | 6      | 0      | -4.490914               | 0.976310  | 0.068688  |
| 4      | 6      | 0      | -4.543227               | 1.542156  | 1.350532  |
| 5      | 6      | 0      | -5.191364               | 2.762293  | 1.561341  |
| 6      | 6      | 0      | -5.785230               | 3.414972  | 0.485557  |
| 7      | 6      | 0      | -3.813362               | -0.320605 | -0.142238 |
| 8      | 6      | 0      | -4.590747               | -1.378081 | -0.427296 |
| 9      | 7      | 0      | -4.061660               | -2.637960 | -0.642167 |
| 10     | 6      | 0      | -2.694563               | -2.891198 | -0.586550 |
| 11     | 6      | 0      | -1.807511               | -1.732494 | -0.235008 |
| 12     | 6      | 0      | -2.375956               | -0.525186 | -0.049484 |
| 13     | 6      | 0      | -4.977139               | -3.721056 | -0.969207 |
| 14     | 6      | 0      | -0.333620               | -2.060100 | -0.153651 |
| 15     | 8      | 0      | -1.652125               | 0.612362  | 0.244821  |
| 16     | 6      | 0      | 0.000745                | -2.851002 | 1.124928  |
| 17     | 6      | 0      | 1.485435                | -2.988826 | 1.297911  |
| 18     | 6      | 0      | 2.342372                | -2.191630 | 0.633312  |
| 19     | 6      | 0      | 1.845604                | -1.073862 | -0.274778 |
| 20     | 8      | 0      | 0.432019                | -0.838285 | -0.135355 |
| 21     | 6      | 0      | 2.520554                | 0.263824  | 0.003631  |
| 22     | 6      | 0      | 3.829561                | -2.402082 | 0.717865  |
| 23     | 6      | 0      | 2.272421                | 0.849260  | 1.372127  |
| 24     | 6      | 0      | 3.275814                | 0.853003  | -0.950034 |
| 25     | 6      | 0      | 4.056465                | 2.144988  | -0.863039 |

|    |   |   |           |           |           |
|----|---|---|-----------|-----------|-----------|
| 26 | 6 | 0 | 3.390789  | 3.195606  | -1.758251 |
| 27 | 6 | 0 | 5.527684  | 1.948025  | -1.289708 |
| 28 | 6 | 0 | 6.333684  | 0.902712  | -0.478816 |
| 29 | 6 | 0 | 6.416752  | 1.273780  | 1.015350  |
| 30 | 6 | 0 | 7.189031  | 0.267053  | 1.857547  |
| 31 | 6 | 0 | 7.727029  | 0.760487  | -1.105487 |
| 32 | 8 | 0 | -6.428142 | 4.607179  | 0.645893  |
| 33 | 8 | 0 | -2.197855 | -3.994754 | -0.805530 |
| 34 | 1 | 0 | -6.200690 | 3.396099  | -1.624551 |
| 35 | 1 | 0 | -5.045663 | 1.240946  | -2.008816 |
| 36 | 1 | 0 | -4.069355 | 1.036007  | 2.188299  |
| 37 | 1 | 0 | -5.216340 | 3.182874  | 2.561220  |
| 38 | 1 | 0 | -5.671921 | -1.290852 | -0.501623 |
| 39 | 1 | 0 | -4.462368 | -4.681588 | -1.048002 |
| 40 | 1 | 0 | -5.738913 | -3.796592 | -0.186491 |
| 41 | 1 | 0 | -5.458144 | -3.500559 | -1.927707 |
| 42 | 1 | 0 | -0.043797 | -2.620819 | -1.052863 |
| 43 | 1 | 0 | -0.701673 | 0.378592  | 0.164610  |
| 44 | 1 | 0 | -0.395784 | -2.343154 | 2.013207  |
| 45 | 1 | 0 | -0.447426 | -3.849365 | 1.087902  |
| 46 | 1 | 0 | 1.841938  | -3.776169 | 1.955932  |
| 47 | 1 | 0 | 2.020790  | -1.380336 | -1.313929 |
| 48 | 1 | 0 | 4.081290  | -3.309879 | 1.276050  |
| 49 | 1 | 0 | 4.254790  | -2.505443 | -0.285774 |
| 50 | 1 | 0 | 4.316637  | -1.561991 | 1.220717  |
| 51 | 1 | 0 | 1.204711  | 0.842916  | 1.611151  |
| 52 | 1 | 0 | 2.797839  | 0.270257  | 2.138414  |
| 53 | 1 | 0 | 2.596151  | 1.888279  | 1.463583  |
| 54 | 1 | 0 | 3.363423  | 0.349980  | -1.915025 |
| 55 | 1 | 0 | 4.051689  | 2.546034  | 0.153703  |

|    |   |   |           |           |           |
|----|---|---|-----------|-----------|-----------|
| 56 | 1 | 0 | 3.380092  | 2.882095  | -2.807936 |
| 57 | 1 | 0 | 2.354026  | 3.373170  | -1.448873 |
| 58 | 1 | 0 | 3.923977  | 4.149501  | -1.697149 |
| 59 | 1 | 0 | 5.551935  | 1.660656  | -2.349845 |
| 60 | 1 | 0 | 6.043546  | 2.916512  | -1.227656 |
| 61 | 1 | 0 | 5.838686  | -0.071597 | -0.568810 |
| 62 | 1 | 0 | 6.876124  | 2.262926  | 1.130871  |
| 63 | 1 | 0 | 5.407688  | 1.341260  | 1.434378  |
| 64 | 1 | 0 | 6.798711  | -0.746529 | 1.717761  |
| 65 | 1 | 0 | 8.255277  | 0.268575  | 1.611134  |
| 66 | 1 | 0 | 7.098752  | 0.520630  | 2.919800  |
| 67 | 1 | 0 | 7.651848  | 0.554247  | -2.178829 |
| 68 | 1 | 0 | 8.314552  | 1.676252  | -0.977222 |
| 69 | 1 | 0 | 8.282791  | -0.069504 | -0.659411 |
| 70 | 1 | 0 | -6.343805 | 4.879483  | 1.573627  |

-----

2c

Standard orientation:

| Center<br>Number | Atomic<br>Number | Atomic<br>Type | Coordinates (Angstroms) |           |           |
|------------------|------------------|----------------|-------------------------|-----------|-----------|
|                  |                  |                | X                       | Y         | Z         |
| 1                | 6                | 0              | -4.836761               | 3.355184  | -0.741496 |
| 2                | 6                | 0              | -4.244442               | 2.099757  | -0.905939 |
| 3                | 6                | 0              | -4.442491               | 1.089653  | 0.046249  |
| 4                | 6                | 0              | -5.237512               | 1.355862  | 1.170441  |
| 5                | 6                | 0              | -5.830197               | 2.609061  | 1.333935  |
| 6                | 6                | 0              | -5.625975               | 3.597170  | 0.377261  |
| 7                | 6                | 0              | -3.821917               | -0.238076 | -0.141669 |
| 8                | 6                | 0              | -4.642168               | -1.260871 | -0.436331 |

|    |   |   |           |           |           |
|----|---|---|-----------|-----------|-----------|
| 9  | 7 | 0 | -4.167214 | -2.543472 | -0.639091 |
| 10 | 6 | 0 | -2.813663 | -2.857380 | -0.564979 |
| 11 | 6 | 0 | -1.879724 | -1.736244 | -0.213274 |
| 12 | 6 | 0 | -2.396631 | -0.503803 | -0.043010 |
| 13 | 6 | 0 | -5.125733 | -3.586829 | -0.975289 |
| 14 | 6 | 0 | -0.422403 | -2.128195 | -0.116178 |
| 15 | 8 | 0 | -1.624318 | 0.603057  | 0.248779  |
| 16 | 6 | 0 | -0.134051 | -2.920397 | 1.172175  |
| 17 | 6 | 0 | 1.341576  | -3.123884 | 1.358172  |
| 18 | 6 | 0 | 2.238850  | -2.371946 | 0.694387  |
| 19 | 6 | 0 | 1.799508  | -1.240844 | -0.226660 |
| 20 | 8 | 0 | 0.396314  | -0.941816 | -0.103112 |
| 21 | 6 | 0 | 2.532791  | 0.067642  | 0.048270  |
| 22 | 6 | 0 | 3.713635  | -2.648524 | 0.791988  |
| 23 | 6 | 0 | 2.292518  | 0.677616  | 1.407796  |
| 24 | 6 | 0 | 3.327985  | 0.609671  | -0.900000 |
| 25 | 6 | 0 | 4.169381  | 1.863746  | -0.812249 |
| 26 | 6 | 0 | 3.556986  | 2.942657  | -1.710213 |
| 27 | 6 | 0 | 5.630301  | 1.594349  | -1.234546 |
| 28 | 6 | 0 | 6.384081  | 0.540080  | -0.392331 |
| 29 | 6 | 0 | 6.433614  | 0.844459  | 1.117542  |
| 30 | 6 | 0 | 7.067349  | 2.177282  | 1.493030  |
| 31 | 6 | 0 | 7.793161  | 0.341347  | -0.963799 |
| 32 | 8 | 0 | -6.223234 | 4.807216  | 0.577510  |
| 33 | 8 | 0 | -2.363634 | -3.983367 | -0.770749 |
| 34 | 1 | 0 | -4.665338 | 4.122993  | -1.489343 |
| 35 | 1 | 0 | -3.617895 | 1.913547  | -1.775284 |
| 36 | 1 | 0 | -5.390523 | 0.592325  | 1.929593  |
| 37 | 1 | 0 | -6.443288 | 2.815308  | 2.205816  |
| 38 | 1 | 0 | -5.717001 | -1.124020 | -0.534520 |

|    |   |   |           |           |           |
|----|---|---|-----------|-----------|-----------|
| 39 | 1 | 0 | -5.905292 | -3.619223 | -0.206809 |
| 40 | 1 | 0 | -5.576804 | -3.352258 | -1.944625 |
| 41 | 1 | 0 | -4.654758 | -4.571039 | -1.036180 |
| 42 | 1 | 0 | -0.149403 | -2.709351 | -1.008705 |
| 43 | 1 | 0 | -0.685085 | 0.321609  | 0.201463  |
| 44 | 1 | 0 | -0.514109 | -2.387401 | 2.052735  |
| 45 | 1 | 0 | -0.626738 | -3.898619 | 1.140489  |
| 46 | 1 | 0 | 1.656820  | -3.921943 | 2.024402  |
| 47 | 1 | 0 | 1.970168  | -1.562982 | -1.262233 |
| 48 | 1 | 0 | 3.920840  | -3.562273 | 1.359604  |
| 49 | 1 | 0 | 4.141732  | -2.781347 | -0.207158 |
| 50 | 1 | 0 | 4.236850  | -1.827227 | 1.290388  |
| 51 | 1 | 0 | 2.674272  | 1.696401  | 1.497873  |
| 52 | 1 | 0 | 1.221801  | 0.735423  | 1.625647  |
| 53 | 1 | 0 | 2.768123  | 0.074973  | 2.188576  |
| 54 | 1 | 0 | 3.405088  | 0.093301  | -1.858348 |
| 55 | 1 | 0 | 4.182389  | 2.262519  | 0.205122  |
| 56 | 1 | 0 | 3.537182  | 2.630140  | -2.761046 |
| 57 | 1 | 0 | 2.529030  | 3.168841  | -1.406860 |
| 58 | 1 | 0 | 4.133970  | 3.872062  | -1.647078 |
| 59 | 1 | 0 | 5.642269  | 1.269811  | -2.285254 |
| 60 | 1 | 0 | 6.186474  | 2.540781  | -1.212859 |
| 61 | 1 | 0 | 5.866594  | -0.421512 | -0.506233 |
| 62 | 1 | 0 | 5.421300  | 0.808029  | 1.534266  |
| 63 | 1 | 0 | 6.989714  | 0.043204  | 1.622010  |
| 64 | 1 | 0 | 6.510315  | 3.020044  | 1.074889  |
| 65 | 1 | 0 | 7.070620  | 2.293265  | 2.581881  |
| 66 | 1 | 0 | 8.103968  | 2.240945  | 1.150539  |
| 67 | 1 | 0 | 8.367749  | 1.272527  | -0.961918 |
| 68 | 1 | 0 | 8.348048  | -0.404785 | -0.384859 |

|    |   |   |           |           |           |
|----|---|---|-----------|-----------|-----------|
| 69 | 1 | 0 | 7.741365  | -0.014209 | -1.998106 |
| 70 | 1 | 0 | -5.959363 | 5.402468  | -0.143363 |

2d

Standard orientation:

| Center<br>Number | Atomic<br>Number | Atomic<br>Type | Coordinates (Angstroms) |           |           |
|------------------|------------------|----------------|-------------------------|-----------|-----------|
|                  |                  |                | X                       | Y         | Z         |
| 1                | 6                | 0              | -5.604820               | 3.006567  | -0.898379 |
| 2                | 6                | 0              | -5.007247               | 1.757038  | -1.069596 |
| 3                | 6                | 0              | -4.442298               | 1.086457  | 0.025439  |
| 4                | 6                | 0              | -4.477331               | 1.691561  | 1.289948  |
| 5                | 6                | 0              | -5.073571               | 2.943454  | 1.460368  |
| 6                | 6                | 0              | -5.634601               | 3.589095  | 0.363173  |
| 7                | 6                | 0              | -3.819860               | -0.243457 | -0.144313 |
| 8                | 6                | 0              | -4.640550               | -1.275719 | -0.403318 |
| 9                | 7                | 0              | -4.164543               | -2.561497 | -0.579308 |
| 10               | 6                | 0              | -2.809759               | -2.871097 | -0.507707 |
| 11               | 6                | 0              | -1.876297               | -1.740779 | -0.183236 |
| 12               | 6                | 0              | -2.394268               | -0.506400 | -0.036677 |
| 13               | 6                | 0              | -5.124642               | -3.613677 | -0.879734 |
| 14               | 6                | 0              | -0.418715               | -2.129241 | -0.083144 |
| 15               | 8                | 0              | -1.622973               | 0.607681  | 0.229243  |
| 16               | 6                | 0              | -0.124217               | -2.897102 | 1.219463  |
| 17               | 6                | 0              | 1.352688                | -3.093497 | 1.404573  |
| 18               | 6                | 0              | 2.245718                | -2.353219 | 0.722687  |
| 19               | 6                | 0              | 1.801733                | -1.240197 | -0.217882 |
| 20               | 8                | 0              | 0.398907                | -0.941126 | -0.094891 |
| 21               | 6                | 0              | 2.533735                | 0.073586  | 0.027468  |

|    |   |   |           |           |           |
|----|---|---|-----------|-----------|-----------|
| 22 | 6 | 0 | 3.722229  | -2.625452 | 0.820221  |
| 23 | 6 | 0 | 2.296728  | 0.710258  | 1.376381  |
| 24 | 6 | 0 | 3.325376  | 0.598290  | -0.933986 |
| 25 | 6 | 0 | 4.164134  | 1.855331  | -0.874064 |
| 26 | 6 | 0 | 3.546117  | 2.915015  | -1.792254 |
| 27 | 6 | 0 | 5.624425  | 1.580377  | -1.296221 |
| 28 | 6 | 0 | 6.382619  | 0.544021  | -0.435665 |
| 29 | 6 | 0 | 6.437565  | 0.879429  | 1.068004  |
| 30 | 6 | 0 | 7.069143  | 2.220389  | 1.414142  |
| 31 | 6 | 0 | 7.790678  | 0.337033  | -1.007199 |
| 32 | 8 | 0 | -6.226235 | 4.811778  | 0.484772  |
| 33 | 8 | 0 | -2.359971 | -4.000694 | -0.691005 |
| 34 | 1 | 0 | -6.039375 | 3.526501  | -1.747623 |
| 35 | 1 | 0 | -4.976285 | 1.313493  | -2.062461 |
| 36 | 1 | 0 | -4.029759 | 1.190709  | 2.144796  |
| 37 | 1 | 0 | -5.086121 | 3.393470  | 2.448027  |
| 38 | 1 | 0 | -5.716998 | -1.144003 | -0.486515 |
| 39 | 1 | 0 | -4.650406 | -4.597938 | -0.927328 |
| 40 | 1 | 0 | -5.892200 | -3.634350 | -0.099713 |
| 41 | 1 | 0 | -5.589348 | -3.401818 | -1.847429 |
| 42 | 1 | 0 | -0.147711 | -2.727238 | -0.964214 |
| 43 | 1 | 0 | -0.683296 | 0.331308  | 0.161433  |
| 44 | 1 | 0 | -0.503054 | -2.346604 | 2.090392  |
| 45 | 1 | 0 | -0.615041 | -3.875393 | 1.208332  |
| 46 | 1 | 0 | 1.671761  | -3.877531 | 2.085338  |
| 47 | 1 | 0 | 1.969090  | -1.582864 | -1.247975 |
| 48 | 1 | 0 | 3.932501  | -3.527720 | 1.404893  |
| 49 | 1 | 0 | 4.146250  | -2.776390 | -0.177907 |
| 50 | 1 | 0 | 4.245163  | -1.793760 | 1.301164  |
| 51 | 1 | 0 | 1.226667  | 0.773219  | 1.594417  |

|    |   |   |           |           |           |
|----|---|---|-----------|-----------|-----------|
| 52 | 1 | 0 | 2.773904  | 0.122730  | 2.166732  |
| 53 | 1 | 0 | 2.680562  | 1.730486  | 1.445791  |
| 54 | 1 | 0 | 3.399524  | 0.063705  | -1.881151 |
| 55 | 1 | 0 | 4.179804  | 2.275361  | 0.134628  |
| 56 | 1 | 0 | 3.523449  | 2.581332  | -2.835140 |
| 57 | 1 | 0 | 2.518983  | 3.145071  | -1.488624 |
| 58 | 1 | 0 | 4.121432  | 3.846109  | -1.749585 |
| 59 | 1 | 0 | 5.633678  | 1.235116  | -2.340106 |
| 60 | 1 | 0 | 6.178777  | 2.527771  | -1.295514 |
| 61 | 1 | 0 | 5.867270  | -0.419835 | -0.527859 |
| 62 | 1 | 0 | 5.426229  | 0.849877  | 1.488936  |
| 63 | 1 | 0 | 6.996420  | 0.089085  | 1.586701  |
| 64 | 1 | 0 | 8.105064  | 2.279567  | 1.067026  |
| 65 | 1 | 0 | 6.508706  | 3.053934  | 0.980791  |
| 66 | 1 | 0 | 7.076475  | 2.358202  | 2.500446  |
| 67 | 1 | 0 | 7.735559  | -0.039229 | -2.034922 |
| 68 | 1 | 0 | 8.364274  | 1.268689  | -1.025985 |
| 69 | 1 | 0 | 8.348783  | -0.397122 | -0.415946 |
| 70 | 1 | 0 | -6.135025 | 5.107035  | 1.405398  |

-----

2e

Standard orientation:

| Center<br>Number | Atomic<br>Number | Atomic<br>Type | Coordinates (Angstroms) |           |           |
|------------------|------------------|----------------|-------------------------|-----------|-----------|
|                  |                  |                | X                       | Y         | Z         |
| 1                | 6                | 0              | -5.065800               | -1.647449 | 1.004429  |
| 2                | 6                | 0              | -4.334874               | -0.458275 | 1.025056  |
| 3                | 6                | 0              | -3.462126               | -0.143671 | -0.026950 |
| 4                | 6                | 0              | -3.328893               | -1.044581 | -1.093889 |

|    |   |   |           |           |           |
|----|---|---|-----------|-----------|-----------|
| 5  | 6 | 0 | -4.056604 | -2.237377 | -1.113776 |
| 6  | 6 | 0 | -4.921390 | -2.525823 | -0.062927 |
| 7  | 6 | 0 | -2.679097 | 1.111684  | -0.011460 |
| 8  | 6 | 0 | -3.356040 | 2.268484  | -0.100679 |
| 9  | 7 | 0 | -2.714745 | 3.493575  | -0.090554 |
| 10 | 6 | 0 | -1.331845 | 3.612428  | 0.021296  |
| 11 | 6 | 0 | -0.550045 | 2.333902  | 0.083520  |
| 12 | 6 | 0 | -1.228582 | 1.169581  | 0.081271  |
| 13 | 6 | 0 | -3.530213 | 4.696870  | -0.166623 |
| 14 | 6 | 0 | 0.950439  | 2.499869  | 0.169194  |
| 15 | 8 | 0 | -0.612607 | -0.062096 | 0.163470  |
| 16 | 6 | 0 | 1.549581  | 2.929008  | -1.182341 |
| 17 | 6 | 0 | 3.048833  | 2.861201  | -1.157147 |
| 18 | 6 | 0 | 3.699854  | 2.148421  | -0.219671 |
| 19 | 6 | 0 | 2.947408  | 1.334848  | 0.824303  |
| 20 | 8 | 0 | 1.539876  | 1.240895  | 0.546684  |
| 21 | 6 | 0 | 3.413738  | -0.112288 | 0.934500  |
| 22 | 6 | 0 | 5.201328  | 2.162189  | -0.129165 |
| 23 | 6 | 0 | 3.774481  | -0.529972 | 2.334245  |
| 24 | 6 | 0 | 3.454852  | -0.926343 | -0.144989 |
| 25 | 6 | 0 | 3.827464  | -2.389252 | -0.204905 |
| 26 | 6 | 0 | 5.218999  | -2.526334 | -0.832093 |
| 27 | 6 | 0 | 2.801548  | -3.207984 | -1.023052 |
| 28 | 6 | 0 | 1.335108  | -3.143793 | -0.529954 |
| 29 | 6 | 0 | 1.185764  | -3.675049 | 0.908293  |
| 30 | 6 | 0 | -0.241341 | -3.628231 | 1.440081  |
| 31 | 6 | 0 | 0.447077  | -3.913735 | -1.516471 |
| 32 | 8 | 0 | -5.651295 | -3.678329 | -0.040935 |
| 33 | 8 | 0 | -0.741257 | 4.690355  | 0.066569  |
| 34 | 1 | 0 | -5.738514 | -1.891536 | 1.821685  |

|    |   |   |           |           |           |
|----|---|---|-----------|-----------|-----------|
| 35 | 1 | 0 | -4.440483 | 0.214293  | 1.873238  |
| 36 | 1 | 0 | -2.642148 | -0.825547 | -1.908227 |
| 37 | 1 | 0 | -3.930921 | -2.920557 | -1.947044 |
| 38 | 1 | 0 | -4.439962 | 2.292258  | -0.183573 |
| 39 | 1 | 0 | -2.919830 | 5.601185  | -0.230083 |
| 40 | 1 | 0 | -4.167631 | 4.643462  | -1.056467 |
| 41 | 1 | 0 | -4.156416 | 4.757002  | 0.729454  |
| 42 | 1 | 0 | 1.189268  | 3.226844  | 0.957580  |
| 43 | 1 | 0 | 0.343617  | 0.097872  | 0.322076  |
| 44 | 1 | 0 | 1.198047  | 2.275275  | -1.990195 |
| 45 | 1 | 0 | 1.242820  | 3.950847  | -1.429537 |
| 46 | 1 | 0 | 3.588556  | 3.430267  | -1.908746 |
| 47 | 1 | 0 | 3.058369  | 1.840706  | 1.791401  |
| 48 | 1 | 0 | 5.645419  | 2.876438  | -0.830390 |
| 49 | 1 | 0 | 5.515982  | 2.452987  | 0.878831  |
| 50 | 1 | 0 | 5.618808  | 1.176735  | -0.355305 |
| 51 | 1 | 0 | 4.534380  | 0.144953  | 2.741908  |
| 52 | 1 | 0 | 2.890511  | -0.485110 | 2.978038  |
| 53 | 1 | 0 | 4.183646  | -1.539644 | 2.398762  |
| 54 | 1 | 0 | 3.168074  | -0.499537 | -1.107769 |
| 55 | 1 | 0 | 3.881819  | -2.825598 | 0.796588  |
| 56 | 1 | 0 | 5.241414  | -2.132036 | -1.853987 |
| 57 | 1 | 0 | 5.968377  | -1.983709 | -0.245120 |
| 58 | 1 | 0 | 5.524548  | -3.577750 | -0.870431 |
| 59 | 1 | 0 | 2.832904  | -2.867694 | -2.067043 |
| 60 | 1 | 0 | 3.123929  | -4.258293 | -1.037193 |
| 61 | 1 | 0 | 1.006254  | -2.098886 | -0.551977 |
| 62 | 1 | 0 | 1.554647  | -4.705725 | 0.966623  |
| 63 | 1 | 0 | 1.805574  | -3.077959 | 1.586916  |
| 64 | 1 | 0 | -0.664363 | -2.623680 | 1.348531  |

|    |   |   |           |           |           |
|----|---|---|-----------|-----------|-----------|
| 65 | 1 | 0 | -0.891832 | -4.331066 | 0.912371  |
| 66 | 1 | 0 | -0.253507 | -3.903991 | 2.500337  |
| 67 | 1 | 0 | 0.607947  | -3.564466 | -2.541325 |
| 68 | 1 | 0 | 0.660937  | -4.987227 | -1.486130 |
| 69 | 1 | 0 | -0.614817 | -3.768332 | -1.294253 |
| 70 | 1 | 0 | -5.417696 | -4.204371 | -0.822561 |

2f

Standard orientation:

| Center<br>Number | Atomic<br>Number | Atomic<br>Type | Coordinates (Angstroms) |           |           |
|------------------|------------------|----------------|-------------------------|-----------|-----------|
|                  |                  |                | X                       | Y         | Z         |
| 1                | 6                | 0              | -4.191882               | -2.249128 | 0.973645  |
| 2                | 6                | 0              | -3.465164               | -1.057102 | 1.031692  |
| 3                | 6                | 0              | -3.471288               | -0.163100 | -0.049484 |
| 4                | 6                | 0              | -4.214766               | -0.484767 | -1.195174 |
| 5                | 6                | 0              | -4.944400               | -1.673219 | -1.252371 |
| 6                | 6                | 0              | -4.927172               | -2.544454 | -0.170020 |
| 7                | 6                | 0              | -2.694539               | 1.093208  | 0.020469  |
| 8                | 6                | 0              | -3.381794               | 2.247105  | 0.048449  |
| 9                | 7                | 0              | -2.747959               | 3.474567  | 0.118862  |
| 10               | 6                | 0              | -1.362331               | 3.596329  | 0.174128  |
| 11               | 6                | 0              | -0.571581               | 2.322731  | 0.129227  |
| 12               | 6                | 0              | -1.242342               | 1.156203  | 0.074734  |
| 13               | 6                | 0              | -3.574351               | 4.671994  | 0.159446  |
| 14               | 6                | 0              | 0.929349                | 2.497411  | 0.175143  |
| 15               | 8                | 0              | -0.615760               | -0.072453 | 0.054161  |
| 16               | 6                | 0              | 1.482485                | 2.988411  | -1.175232 |
| 17               | 6                | 0              | 2.982050                | 2.927244  | -1.201062 |

|    |   |   |           |           |           |
|----|---|---|-----------|-----------|-----------|
| 18 | 6 | 0 | 3.668745  | 2.188278  | -0.308941 |
| 19 | 6 | 0 | 2.954316  | 1.340700  | 0.733526  |
| 20 | 8 | 0 | 1.542127  | 1.229588  | 0.481236  |
| 21 | 6 | 0 | 3.457616  | -0.096619 | 0.808632  |
| 22 | 6 | 0 | 5.171515  | 2.207419  | -0.270899 |
| 23 | 6 | 0 | 3.944716  | -0.500702 | 2.173643  |
| 24 | 6 | 0 | 3.431709  | -0.911147 | -0.270145 |
| 25 | 6 | 0 | 3.837902  | -2.364561 | -0.360425 |
| 26 | 6 | 0 | 5.158922  | -2.468751 | -1.128198 |
| 27 | 6 | 0 | 2.756563  | -3.220122 | -1.059014 |
| 28 | 6 | 0 | 1.343699  | -3.176696 | -0.427216 |
| 29 | 6 | 0 | 1.343833  | -3.678741 | 1.029829  |
| 30 | 6 | 0 | -0.017726 | -3.595873 | 1.707049  |
| 31 | 6 | 0 | 0.381298  | -3.984957 | -1.304895 |
| 32 | 8 | 0 | -5.650403 | -3.696160 | -0.270341 |
| 33 | 8 | 0 | -0.776740 | 4.675009  | 0.256437  |
| 34 | 1 | 0 | -4.165862 | -2.926930 | 1.819894  |
| 35 | 1 | 0 | -2.879322 | -0.831324 | 1.919923  |
| 36 | 1 | 0 | -4.220117 | 0.182517  | -2.053345 |
| 37 | 1 | 0 | -5.516434 | -1.922624 | -2.140943 |
| 38 | 1 | 0 | -4.468745 | 2.266925  | 0.022382  |
| 39 | 1 | 0 | -2.971809 | 5.584483  | 0.158759  |
| 40 | 1 | 0 | -4.230212 | 4.685816  | -0.716497 |
| 41 | 1 | 0 | -4.180399 | 4.653283  | 1.070695  |
| 42 | 1 | 0 | 1.186337  | 3.192599  | 0.986153  |
| 43 | 1 | 0 | 0.346123  | 0.086810  | 0.179304  |
| 44 | 1 | 0 | 1.107382  | 2.367299  | -1.998193 |
| 45 | 1 | 0 | 1.162729  | 4.018059  | -1.366436 |
| 46 | 1 | 0 | 3.493278  | 3.521456  | -1.952893 |
| 47 | 1 | 0 | 3.074312  | 1.828871  | 1.709772  |

|    |   |   |           |           |           |
|----|---|---|-----------|-----------|-----------|
| 48 | 1 | 0 | 5.587494  | 2.947216  | -0.964024 |
| 49 | 1 | 0 | 5.521904  | 2.465924  | 0.733177  |
| 50 | 1 | 0 | 5.584908  | 1.232475  | -0.546044 |
| 51 | 1 | 0 | 4.715406  | 0.196892  | 2.518007  |
| 52 | 1 | 0 | 3.115289  | -0.478961 | 2.888577  |
| 53 | 1 | 0 | 4.386694  | -1.497255 | 2.206162  |
| 54 | 1 | 0 | 3.057342  | -0.491780 | -1.206945 |
| 55 | 1 | 0 | 4.010140  | -2.788791 | 0.631678  |
| 56 | 1 | 0 | 5.063431  | -2.082828 | -2.150057 |
| 57 | 1 | 0 | 5.949602  | -1.899346 | -0.626856 |
| 58 | 1 | 0 | 5.488892  | -3.511129 | -1.191890 |
| 59 | 1 | 0 | 2.677335  | -2.899603 | -2.107704 |
| 60 | 1 | 0 | 3.099702  | -4.263662 | -1.086772 |
| 61 | 1 | 0 | 0.993222  | -2.139143 | -0.437092 |
| 62 | 1 | 0 | 1.701790  | -4.714794 | 1.068459  |
| 63 | 1 | 0 | 2.039345  | -3.080894 | 1.627442  |
| 64 | 1 | 0 | -0.426596 | -2.582453 | 1.644241  |
| 65 | 1 | 0 | -0.734460 | -4.290498 | 1.260020  |
| 66 | 1 | 0 | 0.074866  | -3.857145 | 2.766561  |
| 67 | 1 | 0 | 0.432107  | -3.653288 | -2.347339 |
| 68 | 1 | 0 | 0.621814  | -5.053673 | -1.277657 |
| 69 | 1 | 0 | -0.656784 | -3.858470 | -0.981363 |
| 70 | 1 | 0 | -5.511077 | -4.218435 | 0.537658  |

-----

2g

Standard orientation:

-----

| Center | Atomic | Atomic | Coordinates (Angstroms) |   |   |
|--------|--------|--------|-------------------------|---|---|
| Number | Number | Type   | X                       | Y | Z |

-----

|    |   |   |           |           |           |
|----|---|---|-----------|-----------|-----------|
| 1  | 6 | 0 | -4.074458 | -2.398948 | 0.626318  |
| 2  | 6 | 0 | -3.363557 | -1.208384 | 0.797963  |
| 3  | 6 | 0 | -3.447188 | -0.182449 | -0.155256 |
| 4  | 6 | 0 | -4.250313 | -0.369486 | -1.289663 |
| 5  | 6 | 0 | -4.963706 | -1.558232 | -1.460610 |
| 6  | 6 | 0 | -4.870356 | -2.562049 | -0.503105 |
| 7  | 6 | 0 | -2.687565 | 1.072490  | 0.035446  |
| 8  | 6 | 0 | -3.393083 | 2.199057  | 0.238469  |
| 9  | 7 | 0 | -2.777148 | 3.422002  | 0.436684  |
| 10 | 6 | 0 | -1.392661 | 3.567602  | 0.448366  |
| 11 | 6 | 0 | -0.583819 | 2.326569  | 0.214622  |
| 12 | 6 | 0 | -1.236645 | 1.161439  | 0.037846  |
| 13 | 6 | 0 | -3.621157 | 4.586689  | 0.659306  |
| 14 | 6 | 0 | 0.914523  | 2.525164  | 0.223799  |
| 15 | 8 | 0 | -0.589663 | -0.040699 | -0.168604 |
| 16 | 6 | 0 | 1.402437  | 3.166425  | -1.087182 |
| 17 | 6 | 0 | 2.898379  | 3.112837  | -1.198898 |
| 18 | 6 | 0 | 3.632487  | 2.292855  | -0.423565 |
| 19 | 6 | 0 | 2.977221  | 1.346674  | 0.573032  |
| 20 | 8 | 0 | 1.554232  | 1.243712  | 0.370089  |
| 21 | 6 | 0 | 3.504219  | -0.081913 | 0.486871  |
| 22 | 6 | 0 | 5.134524  | 2.311021  | -0.478401 |
| 23 | 6 | 0 | 4.310215  | -0.511623 | 1.681152  |
| 24 | 6 | 0 | 3.214121  | -0.869921 | -0.573068 |
| 25 | 6 | 0 | 3.573329  | -2.319751 | -0.801623 |
| 26 | 6 | 0 | 4.488712  | -2.420539 | -2.026054 |
| 27 | 6 | 0 | 2.305276  | -3.177919 | -1.019760 |
| 28 | 6 | 0 | 1.303719  | -3.199311 | 0.161000  |
| 29 | 6 | 0 | 1.903656  | -3.880980 | 1.405295  |
| 30 | 6 | 0 | 0.980483  | -3.864580 | 2.616920  |

|    |   |   |           |           |           |
|----|---|---|-----------|-----------|-----------|
| 31 | 6 | 0 | 0.012045  | -3.891013 | -0.294441 |
| 32 | 8 | 0 | -5.580235 | -3.706881 | -0.711472 |
| 33 | 8 | 0 | -0.821327 | 4.640818  | 0.635389  |
| 34 | 1 | 0 | -3.988415 | -3.179023 | 1.374434  |
| 35 | 1 | 0 | -2.730494 | -1.086093 | 1.674545  |
| 36 | 1 | 0 | -4.316880 | 0.402021  | -2.051965 |
| 37 | 1 | 0 | -5.583738 | -1.703017 | -2.340961 |
| 38 | 1 | 0 | -4.479601 | 2.197731  | 0.262476  |
| 39 | 1 | 0 | -4.306019 | 4.700335  | -0.187349 |
| 40 | 1 | 0 | -4.196152 | 4.436981  | 1.579210  |
| 41 | 1 | 0 | -3.033884 | 5.504226  | 0.758661  |
| 42 | 1 | 0 | 1.195561  | 3.136331  | 1.093182  |
| 43 | 1 | 0 | 0.370787  | 0.120690  | -0.040900 |
| 44 | 1 | 0 | 0.984723  | 2.642207  | -1.956002 |
| 45 | 1 | 0 | 1.075258  | 4.210054  | -1.144527 |
| 46 | 1 | 0 | 3.368126  | 3.777231  | -1.918452 |
| 47 | 1 | 0 | 3.129930  | 1.740535  | 1.586467  |
| 48 | 1 | 0 | 5.510428  | 3.105375  | -1.132206 |
| 49 | 1 | 0 | 5.549287  | 2.485124  | 0.519943  |
| 50 | 1 | 0 | 5.523890  | 1.361615  | -0.860232 |
| 51 | 1 | 0 | 4.770502  | -1.494964 | 1.569311  |
| 52 | 1 | 0 | 5.125360  | 0.197447  | 1.861883  |
| 53 | 1 | 0 | 3.674636  | -0.540204 | 2.572095  |
| 54 | 1 | 0 | 2.619253  | -0.429483 | -1.375472 |
| 55 | 1 | 0 | 4.130305  | -2.732831 | 0.042129  |
| 56 | 1 | 0 | 3.994148  | -2.053621 | -2.932256 |
| 57 | 1 | 0 | 5.403579  | -1.834651 | -1.880519 |
| 58 | 1 | 0 | 4.785308  | -3.460897 | -2.202511 |
| 59 | 1 | 0 | 1.786278  | -2.810757 | -1.916373 |
| 60 | 1 | 0 | 2.608291  | -4.208766 | -1.245383 |

|    |   |   |           |           |           |
|----|---|---|-----------|-----------|-----------|
| 61 | 1 | 0 | 1.041601  | -2.168689 | 0.424298  |
| 62 | 1 | 0 | 2.172197  | -4.917814 | 1.173952  |
| 63 | 1 | 0 | 2.828691  | -3.373206 | 1.696139  |
| 64 | 1 | 0 | 0.099432  | -4.494925 | 2.461485  |
| 65 | 1 | 0 | 1.508200  | -4.250683 | 3.495143  |
| 66 | 1 | 0 | 0.646432  | -2.846273 | 2.843246  |
| 67 | 1 | 0 | 0.183493  | -4.950786 | -0.505941 |
| 68 | 1 | 0 | -0.771951 | -3.814288 | 0.465740  |
| 69 | 1 | 0 | -0.380366 | -3.422484 | -1.203957 |
| 70 | 1 | 0 | -5.387244 | -4.324401 | 0.011982  |

**Table S5** Gibbs free energies and Boltzmann-population of low-energy conformers of *2R*, *3R* -**7**.

| Conformers of Compound | In MeOH      |                   |
|------------------------|--------------|-------------------|
|                        | $\Delta G^a$ | P(%) <sup>b</sup> |
| <b>7a</b>              | 0.00         | 28.61%            |
| <b>7b</b>              | 0.29         | 17.45%            |
| <b>7c</b>              | 0.77         | 7.81%             |
| <b>7d</b>              | 1.04         | 4.91%             |
| <b>7e</b>              | 0.99         | 5.32%             |
| <b>7f</b>              | 0.27         | 17.87%            |
| <b>7g</b>              | 0.27         | 18.02%            |

**Table S6** Cartesian coordinates for the low-energy optimized conformers of *2R*, *3R* -**7** at B3LYP/6-31+G (d, p) level of theory in MeOH.

**7a**

Standard orientation:

| Center | Atomic | Atomic | Coordinates (Angstroms) |   |   |
|--------|--------|--------|-------------------------|---|---|
| Number | Number | Type   | X                       | Y | Z |

|       |   |   |           |           |           |
|-------|---|---|-----------|-----------|-----------|
| ----- |   |   |           |           |           |
| 1     | 6 | 0 | -0.385768 | 0.156118  | 1.195915  |
| 2     | 6 | 0 | -1.406500 | -0.893125 | 0.673242  |
| 3     | 6 | 0 | -2.368687 | -0.082995 | -0.165954 |
| 4     | 6 | 0 | -2.010895 | 1.190702  | -0.370922 |
| 5     | 6 | 0 | -0.743841 | 1.383059  | 0.358326  |
| 6     | 8 | 0 | -0.095407 | 2.419866  | 0.312579  |
| 7     | 6 | 0 | -2.672862 | 2.279298  | -1.120903 |
| 8     | 8 | 0 | -3.572306 | -0.577517 | -0.614931 |
| 9     | 6 | 0 | -3.608045 | -1.971549 | -0.901889 |
| 10    | 8 | 0 | 0.994360  | -0.227794 | 1.168725  |
| 11    | 6 | 0 | -0.695117 | 0.515999  | 2.656556  |
| 12    | 6 | 0 | 1.588729  | -0.357600 | -0.047764 |
| 13    | 6 | 0 | 3.074342  | -0.616231 | 0.115727  |
| 14    | 8 | 0 | 0.994785  | -0.318228 | -1.118037 |
| 15    | 6 | 0 | 3.309514  | -2.122294 | 0.043187  |
| 16    | 6 | 0 | 3.888161  | 0.123000  | -0.955534 |
| 17    | 6 | 0 | 3.819140  | 1.636439  | -0.800257 |
| 18    | 8 | 0 | -0.825768 | -1.928551 | -0.113692 |
| 19    | 1 | 0 | -1.936351 | -1.371710 | 1.504048  |
| 20    | 1 | 0 | -2.023664 | 2.638867  | -1.926010 |
| 21    | 1 | 0 | -2.898144 | 3.120416  | -0.456647 |
| 22    | 1 | 0 | -3.612290 | 1.948152  | -1.572099 |
| 23    | 1 | 0 | -4.599551 | -2.204593 | -1.300505 |
| 24    | 1 | 0 | -2.870449 | -2.232481 | -1.667796 |
| 25    | 1 | 0 | -3.466046 | -2.567417 | 0.004610  |
| 26    | 1 | 0 | -0.023090 | 1.305971  | 3.011181  |
| 27    | 1 | 0 | -0.533514 | -0.349094 | 3.309114  |
| 28    | 1 | 0 | -1.724559 | 0.866852  | 2.790604  |
| 29    | 1 | 0 | 3.388955  | -0.254545 | 1.102643  |

|    |   |   |           |           |           |
|----|---|---|-----------|-----------|-----------|
| 30 | 1 | 0 | 3.010791  | -2.524813 | -0.931642 |
| 31 | 1 | 0 | 2.725144  | -2.645615 | 0.807267  |
| 32 | 1 | 0 | 4.366179  | -2.360691 | 0.201333  |
| 33 | 1 | 0 | 4.939357  | -0.183679 | -0.889919 |
| 34 | 1 | 0 | 3.539654  | -0.148597 | -1.959720 |
| 35 | 1 | 0 | 4.177405  | 1.945520  | 0.187265  |
| 36 | 1 | 0 | 4.448257  | 2.120500  | -1.553594 |
| 37 | 1 | 0 | 2.797792  | 2.007734  | -0.928321 |
| 38 | 1 | 0 | -0.400215 | -1.497913 | -0.887367 |

7b

Standard orientation:

| Center<br>Number | Atomic<br>Number | Atomic<br>Type | Coordinates (Angstroms) |           |           |
|------------------|------------------|----------------|-------------------------|-----------|-----------|
|                  |                  |                | X                       | Y         | Z         |
| 1                | 6                | 0              | 0.251660                | -0.506428 | 0.958734  |
| 2                | 6                | 0              | 1.095846                | 0.788541  | 0.795883  |
| 3                | 6                | 0              | 2.324500                | 0.331912  | 0.041604  |
| 4                | 6                | 0              | 2.278866                | -0.925483 | -0.412356 |
| 5                | 6                | 0              | 0.983266                | -1.474062 | 0.029880  |
| 6                | 8                | 0              | 0.582551                | -2.585095 | -0.290467 |
| 7                | 6                | 0              | 3.262807                | -1.721610 | -1.176742 |
| 8                | 8                | 0              | 3.452089                | 1.110667  | -0.094821 |
| 9                | 6                | 0              | 3.236573                | 2.516955  | -0.165400 |
| 10               | 8                | 0              | -1.157443               | -0.384958 | 0.733621  |
| 11               | 6                | 0              | 0.404602                | -1.064544 | 2.381640  |
| 12               | 6                | 0              | -1.579096               | -0.147140 | -0.535137 |
| 13               | 6                | 0              | -3.089266               | -0.224771 | -0.649060 |
| 14               | 8                | 0              | -0.837056               | 0.124354  | -1.472606 |

|    |   |   |           |           |           |
|----|---|---|-----------|-----------|-----------|
| 15 | 6 | 0 | -3.560777 | -1.633482 | -0.293659 |
| 16 | 6 | 0 | -3.784655 | 0.830930  | 0.220741  |
| 17 | 6 | 0 | -3.481503 | 2.254133  | -0.230004 |
| 18 | 8 | 0 | 0.438860  | 1.825269  | 0.073274  |
| 19 | 1 | 0 | 1.377517  | 1.197445  | 1.772287  |
| 20 | 1 | 0 | 2.837196  | -2.039873 | -2.132669 |
| 21 | 1 | 0 | 3.554738  | -2.614551 | -0.614186 |
| 22 | 1 | 0 | 4.171412  | -1.147969 | -1.389458 |
| 23 | 1 | 0 | 4.206153  | 2.994140  | -0.332959 |
| 24 | 1 | 0 | 2.588327  | 2.770618  | -1.010023 |
| 25 | 1 | 0 | 2.833121  | 2.904200  | 0.774623  |
| 26 | 1 | 0 | -0.131501 | -2.015390 | 2.484535  |
| 27 | 1 | 0 | -0.033081 | -0.376612 | 3.113445  |
| 28 | 1 | 0 | 1.451895  | -1.238826 | 2.650692  |
| 29 | 1 | 0 | -3.341677 | -0.043236 | -1.701117 |
| 30 | 1 | 0 | -3.384112 | -1.864219 | 0.763555  |
| 31 | 1 | 0 | -3.028106 | -2.384086 | -0.887879 |
| 32 | 1 | 0 | -4.631747 | -1.745451 | -0.488729 |
| 33 | 1 | 0 | -4.869969 | 0.679617  | 0.176492  |
| 34 | 1 | 0 | -3.492031 | 0.721179  | 1.271804  |
| 35 | 1 | 0 | -3.770278 | 2.404639  | -1.274724 |
| 36 | 1 | 0 | -4.039911 | 2.969299  | 0.382401  |
| 37 | 1 | 0 | -2.417558 | 2.487945  | -0.129628 |
| 38 | 1 | 0 | 0.230640  | 1.469522  | -0.817214 |

-----

7c

Standard orientation:

-----

| Center | Atomic | Atomic | Coordinates (Angstroms) |   |   |
|--------|--------|--------|-------------------------|---|---|
| Number | Number | Type   | X                       | Y | Z |

|    |   |   |           |           |           |
|----|---|---|-----------|-----------|-----------|
| 1  | 6 | 0 | -0.353861 | 0.303619  | 1.129275  |
| 2  | 6 | 0 | -1.477457 | -0.731430 | 0.846759  |
| 3  | 6 | 0 | -2.398782 | -0.018990 | -0.117871 |
| 4  | 6 | 0 | -1.943940 | 1.153001  | -0.576731 |
| 5  | 6 | 0 | -0.639300 | 1.370917  | 0.074620  |
| 6  | 8 | 0 | 0.090102  | 2.318146  | -0.186551 |
| 7  | 6 | 0 | -2.539757 | 2.129386  | -1.513706 |
| 8  | 8 | 0 | -3.655469 | -0.481720 | -0.436090 |
| 9  | 6 | 0 | -3.818015 | -1.897480 | -0.440959 |
| 10 | 8 | 0 | 0.988311  | -0.198336 | 1.150814  |
| 11 | 6 | 0 | -0.577500 | 0.967793  | 2.496218  |
| 12 | 6 | 0 | 1.526434  | -0.617154 | -0.026812 |
| 13 | 6 | 0 | 2.999067  | -0.940591 | 0.152899  |
| 14 | 8 | 0 | 0.894527  | -0.737576 | -1.069763 |
| 15 | 6 | 0 | 3.517385  | -1.785695 | -1.008935 |
| 16 | 6 | 0 | 3.820717  | 0.338583  | 0.375767  |
| 17 | 6 | 0 | 3.862658  | 1.286052  | -0.817184 |
| 18 | 8 | 0 | -1.014950 | -1.948814 | 0.267190  |
| 19 | 1 | 0 | -2.013938 | -0.989533 | 1.765794  |
| 20 | 1 | 0 | -1.893398 | 2.266036  | -2.386938 |
| 21 | 1 | 0 | -2.669752 | 3.100509  | -1.025876 |
| 22 | 1 | 0 | -3.521508 | 1.801274  | -1.872199 |
| 23 | 1 | 0 | -4.840208 | -2.113900 | -0.766159 |
| 24 | 1 | 0 | -3.133956 | -2.366379 | -1.153878 |
| 25 | 1 | 0 | -3.693723 | -2.314421 | 0.563160  |
| 26 | 1 | 0 | 0.172135  | 1.748016  | 2.674280  |
| 27 | 1 | 0 | -0.464348 | 0.235912  | 3.303621  |
| 28 | 1 | 0 | -1.567616 | 1.428136  | 2.579945  |
| 29 | 1 | 0 | 3.076202  | -1.562358 | 1.055474  |

|    |   |   |           |           |           |
|----|---|---|-----------|-----------|-----------|
| 30 | 1 | 0 | 3.388167  | -1.283699 | -1.973833 |
| 31 | 1 | 0 | 2.969887  | -2.733746 | -1.065777 |
| 32 | 1 | 0 | 4.578904  | -2.017568 | -0.880350 |
| 33 | 1 | 0 | 3.418440  | 0.887513  | 1.236129  |
| 34 | 1 | 0 | 4.848736  | 0.061972  | 0.637623  |
| 35 | 1 | 0 | 2.857452  | 1.590444  | -1.122934 |
| 36 | 1 | 0 | 4.420827  | 2.189946  | -0.554582 |
| 37 | 1 | 0 | 4.363686  | 0.827586  | -1.675787 |
| 38 | 1 | 0 | -0.582044 | -1.717392 | -0.582546 |

7d

Standard orientation:

| Center<br>Number | Atomic<br>Number | Atomic<br>Type | Coordinates (Angstroms) |           |           |
|------------------|------------------|----------------|-------------------------|-----------|-----------|
|                  |                  |                | X                       | Y         | Z         |
| 1                | 6                | 0              | -0.324515               | -0.786957 | -0.572323 |
| 2                | 6                | 0              | -1.016207               | 0.591373  | -0.742458 |
| 3                | 6                | 0              | -2.389519               | 0.393033  | -0.152713 |
| 4                | 6                | 0              | -2.563757               | -0.756174 | 0.505164  |
| 5                | 6                | 0              | -1.282425               | -1.474749 | 0.392133  |
| 6                | 8                | 0              | -1.066101               | -2.526597 | 0.982122  |
| 7                | 6                | 0              | -3.741612               | -1.314120 | 1.201245  |
| 8                | 8                | 0              | -3.421969               | 1.275794  | -0.377048 |
| 9                | 6                | 0              | -3.071190               | 2.645425  | -0.203452 |
| 10               | 8                | 0              | 0.977550                | -0.802335 | 0.037378  |
| 11               | 6                | 0              | -0.319480               | -1.607761 | -1.867552 |
| 12               | 6                | 0              | 1.953501                | -0.049609 | -0.525169 |
| 13               | 6                | 0              | 3.276561                | -0.274914 | 0.181050  |
| 14               | 8                | 0              | 1.774647                | 0.731656  | -1.451555 |

|    |   |   |           |           |           |
|----|---|---|-----------|-----------|-----------|
| 15 | 6 | 0 | 4.373953  | -0.454942 | -0.866876 |
| 16 | 6 | 0 | 3.594895  | 0.898794  | 1.114475  |
| 17 | 6 | 0 | 2.665880  | 0.963856  | 2.319432  |
| 18 | 8 | 0 | -0.364510 | 1.639706  | -0.027928 |
| 19 | 1 | 0 | -1.095069 | 0.879721  | -1.797086 |
| 20 | 1 | 0 | -3.516443 | -1.483653 | 2.258847  |
| 21 | 1 | 0 | -4.035759 | -2.269191 | 0.753219  |
| 22 | 1 | 0 | -4.601295 | -0.639865 | 1.145984  |
| 23 | 1 | 0 | -3.991732 | 3.234744  | -0.254711 |
| 24 | 1 | 0 | -2.616847 | 2.816968  | 0.778429  |
| 25 | 1 | 0 | -2.412508 | 2.986552  | -1.008263 |
| 26 | 1 | 0 | 0.124120  | -2.595871 | -1.698314 |
| 27 | 1 | 0 | 0.281856  | -1.120218 | -2.641594 |
| 28 | 1 | 0 | -1.329636 | -1.755085 | -2.264372 |
| 29 | 1 | 0 | 3.216744  | -1.206372 | 0.760033  |
| 30 | 1 | 0 | 4.511447  | 0.453151  | -1.464174 |
| 31 | 1 | 0 | 4.122969  | -1.269396 | -1.556492 |
| 32 | 1 | 0 | 5.330081  | -0.696629 | -0.390907 |
| 33 | 1 | 0 | 4.624667  | 0.805562  | 1.481010  |
| 34 | 1 | 0 | 3.534039  | 1.848374  | 0.568530  |
| 35 | 1 | 0 | 2.699418  | 0.031307  | 2.891370  |
| 36 | 1 | 0 | 2.968932  | 1.779203  | 2.983472  |
| 37 | 1 | 0 | 1.630495  | 1.146609  | 2.018375  |
| 38 | 1 | 0 | 0.421074  | 1.868782  | -0.564859 |

7e

Standard orientation:

| Center | Atomic | Atomic | Coordinates (Angstroms) |   |   |
|--------|--------|--------|-------------------------|---|---|
| Number | Number | Type   | X                       | Y | Z |

|       |   |   |           |           |           |
|-------|---|---|-----------|-----------|-----------|
| ----- |   |   |           |           |           |
| 1     | 6 | 0 | 0.388085  | -0.790034 | 0.474624  |
| 2     | 6 | 0 | 1.043309  | 0.603147  | 0.669111  |
| 3     | 6 | 0 | 2.440811  | 0.435338  | 0.129860  |
| 4     | 6 | 0 | 2.663716  | -0.709989 | -0.521880 |
| 5     | 6 | 0 | 1.394019  | -1.455383 | -0.455469 |
| 6     | 8 | 0 | 1.222956  | -2.511330 | -1.053040 |
| 7     | 6 | 0 | 3.877562  | -1.240860 | -1.175136 |
| 8     | 8 | 0 | 3.445963  | 1.339457  | 0.391256  |
| 9     | 6 | 0 | 3.071916  | 2.701378  | 0.205141  |
| 10    | 8 | 0 | -0.891207 | -0.830566 | -0.181878 |
| 11    | 6 | 0 | 0.353702  | -1.612933 | 1.766901  |
| 12    | 6 | 0 | -1.901653 | -0.098403 | 0.347758  |
| 13    | 6 | 0 | -3.198882 | -0.379640 | -0.385710 |
| 14    | 8 | 0 | -1.773900 | 0.674153  | 1.289451  |
| 15    | 6 | 0 | -3.937260 | -1.489771 | 0.357402  |
| 16    | 6 | 0 | -4.067768 | 0.881410  | -0.495208 |
| 17    | 6 | 0 | -3.448845 | 1.940697  | -1.398612 |
| 18    | 8 | 0 | 0.394214  | 1.636621  | -0.067693 |
| 19    | 1 | 0 | 1.077891  | 0.892143  | 1.726726  |
| 20    | 1 | 0 | 3.694195  | -1.414164 | -2.240120 |
| 21    | 1 | 0 | 4.175817  | -2.189418 | -0.717896 |
| 22    | 1 | 0 | 4.720179  | -0.548204 | -1.089337 |
| 23    | 1 | 0 | 3.976536  | 3.311138  | 0.289930  |
| 24    | 1 | 0 | 2.648967  | 2.863552  | -0.792751 |
| 25    | 1 | 0 | 2.376751  | 3.026617  | 0.985704  |
| 26    | 1 | 0 | -0.065424 | -2.608445 | 1.581050  |
| 27    | 1 | 0 | -0.284232 | -1.139493 | 2.520966  |
| 28    | 1 | 0 | 1.351928  | -1.741857 | 2.199726  |
| 29    | 1 | 0 | -2.960421 | -0.726051 | -1.398962 |

|    |   |   |           |           |           |
|----|---|---|-----------|-----------|-----------|
| 30 | 1 | 0 | -4.195947 | -1.181653 | 1.376787  |
| 31 | 1 | 0 | -3.316717 | -2.388754 | 0.433542  |
| 32 | 1 | 0 | -4.862243 | -1.760362 | -0.162330 |
| 33 | 1 | 0 | -5.049231 | 0.612344  | -0.903398 |
| 34 | 1 | 0 | -4.243763 | 1.316042  | 0.496139  |
| 35 | 1 | 0 | -3.276733 | 1.545184  | -2.404402 |
| 36 | 1 | 0 | -4.120566 | 2.800764  | -1.483935 |
| 37 | 1 | 0 | -2.494360 | 2.299641  | -1.001520 |
| 38 | 1 | 0 | -0.409123 | 1.854555  | 0.446603  |

7f

Standard orientation:

| Center | Atomic | Atomic | Coordinates (Angstroms) |           |           |
|--------|--------|--------|-------------------------|-----------|-----------|
| Number | Number | Type   | X                       | Y         | Z         |
| 1      | 6      | 0      | -0.407690               | 0.468193  | 1.043098  |
| 2      | 6      | 0      | -1.489495               | -0.640428 | 0.920505  |
| 3      | 6      | 0      | -2.489138               | -0.070878 | -0.060706 |
| 4      | 6      | 0      | -2.115198               | 1.067186  | -0.657413 |
| 5      | 6      | 0      | -0.793768               | 1.407805  | -0.099261 |
| 6      | 8      | 0      | -0.123252               | 2.352431  | -0.492575 |
| 7      | 6      | 0      | -2.802808               | 1.915801  | -1.654473 |
| 8      | 8      | 0      | -3.736446               | -0.619359 | -0.265564 |
| 9      | 6      | 0      | -3.827570               | -2.033538 | -0.122527 |
| 10     | 8      | 0      | 0.957198                | 0.032864  | 1.046288  |
| 11     | 6      | 0      | -0.602695               | 1.258136  | 2.344968  |
| 12     | 6      | 0      | 1.460612                | -0.482211 | -0.108206 |
| 13     | 6      | 0      | 2.956264                | -0.701640 | 0.022409  |
| 14     | 8      | 0      | 0.792015                | -0.732276 | -1.102930 |

|    |   |   |           |           |           |
|----|---|---|-----------|-----------|-----------|
| 15 | 6 | 0 | 3.396867  | -1.839462 | -0.895800 |
| 16 | 6 | 0 | 3.676899  | 0.620936  | -0.273395 |
| 17 | 6 | 0 | 5.174711  | 0.563123  | -0.012456 |
| 18 | 8 | 0 | -0.994295 | -1.887037 | 0.441123  |
| 19 | 1 | 0 | -1.969442 | -0.829132 | 1.887295  |
| 20 | 1 | 0 | -2.205791 | 1.991343  | -2.568518 |
| 21 | 1 | 0 | -2.956716 | 2.924484  | -1.258478 |
| 22 | 1 | 0 | -3.781246 | 1.509661  | -1.926106 |
| 23 | 1 | 0 | -4.852024 | -2.327786 | -0.371388 |
| 24 | 1 | 0 | -3.155342 | -2.541675 | -0.821374 |
| 25 | 1 | 0 | -3.634770 | -2.341498 | 0.908942  |
| 26 | 1 | 0 | 0.113446  | 2.086534  | 2.405749  |
| 27 | 1 | 0 | -0.416992 | 0.618208  | 3.215014  |
| 28 | 1 | 0 | -1.610569 | 1.679298  | 2.430896  |
| 29 | 1 | 0 | 3.155555  | -1.016071 | 1.056110  |
| 30 | 1 | 0 | 3.298820  | -1.561435 | -1.951801 |
| 31 | 1 | 0 | 2.782260  | -2.731741 | -0.732358 |
| 32 | 1 | 0 | 4.439144  | -2.117865 | -0.711776 |
| 33 | 1 | 0 | 3.501316  | 0.920911  | -1.313571 |
| 34 | 1 | 0 | 3.248179  | 1.416811  | 0.349985  |
| 35 | 1 | 0 | 5.674800  | -0.125537 | -0.699622 |
| 36 | 1 | 0 | 5.617997  | 1.553972  | -0.154853 |
| 37 | 1 | 0 | 5.382322  | 0.243778  | 1.013719  |
| 38 | 1 | 0 | -0.614653 | -1.723376 | -0.449058 |

7g

Standard orientation:

| Center | Atomic | Atomic | Coordinates (Angstroms) |   |   |
|--------|--------|--------|-------------------------|---|---|
| Number | Number | Type   | X                       | Y | Z |

|    |   |   |           |           |           |
|----|---|---|-----------|-----------|-----------|
| 1  | 6 | 0 | -0.521917 | 0.339082  | 1.158548  |
| 2  | 6 | 0 | -1.433218 | -0.843277 | 0.722714  |
| 3  | 6 | 0 | -2.454423 | -0.201716 | -0.189473 |
| 4  | 6 | 0 | -2.214625 | 1.077512  | -0.502162 |
| 5  | 6 | 0 | -0.981033 | 1.450143  | 0.214740  |
| 6  | 8 | 0 | -0.431852 | 2.535513  | 0.082789  |
| 7  | 6 | 0 | -2.964323 | 2.030479  | -1.347085 |
| 8  | 8 | 0 | -3.601459 | -0.844114 | -0.600657 |
| 9  | 6 | 0 | -3.501875 | -2.255590 | -0.765016 |
| 10 | 8 | 0 | 0.887395  | 0.084655  | 1.175551  |
| 11 | 6 | 0 | -0.887323 | 0.793174  | 2.579512  |
| 12 | 6 | 0 | 1.512466  | -0.096995 | -0.019582 |
| 13 | 6 | 0 | 3.010614  | -0.218129 | 0.182262  |
| 14 | 8 | 0 | 0.933775  | -0.198766 | -1.094508 |
| 15 | 6 | 0 | 3.345577  | -1.674668 | 0.488647  |
| 16 | 6 | 0 | 3.747064  | 0.320435  | -1.053816 |
| 17 | 6 | 0 | 5.252616  | 0.426996  | -0.856566 |
| 18 | 8 | 0 | -0.746384 | -1.882078 | 0.029899  |
| 19 | 1 | 0 | -1.926383 | -1.297412 | 1.588990  |
| 20 | 1 | 0 | -2.340815 | 2.378024  | -2.177003 |
| 21 | 1 | 0 | -3.276290 | 2.900188  | -0.761350 |
| 22 | 1 | 0 | -3.863701 | 1.573501  | -1.773585 |
| 23 | 1 | 0 | -4.462557 | -2.613788 | -1.147548 |
| 24 | 1 | 0 | -2.733389 | -2.510327 | -1.501129 |
| 25 | 1 | 0 | -3.318429 | -2.755402 | 0.191068  |
| 26 | 1 | 0 | -0.296267 | 1.670242  | 2.869165  |
| 27 | 1 | 0 | -0.655066 | 0.005595  | 3.306617  |
| 28 | 1 | 0 | -1.946037 | 1.055384  | 2.675092  |
| 29 | 1 | 0 | 3.282979  | 0.408841  | 1.041252  |

|    |   |   |           |           |           |
|----|---|---|-----------|-----------|-----------|
| 30 | 1 | 0 | 3.133983  | -2.318806 | -0.372357 |
| 31 | 1 | 0 | 2.746982  | -2.046481 | 1.327857  |
| 32 | 1 | 0 | 4.399908  | -1.794102 | 0.755754  |
| 33 | 1 | 0 | 3.543512  | -0.314589 | -1.924631 |
| 34 | 1 | 0 | 3.358406  | 1.316335  | -1.300922 |
| 35 | 1 | 0 | 5.710935  | -0.556557 | -0.723954 |
| 36 | 1 | 0 | 5.713825  | 0.891770  | -1.735076 |
| 37 | 1 | 0 | 5.492617  | 1.041989  | 0.015731  |
| 38 | 1 | 0 | -0.353613 | -1.480764 | -0.774896 |

**Table S7** Gibbs free energies and Boltzmann-population of low-energy conformers of 2*S*, 3*R* -7.

| Conformers of Compound | In MeOH      |                   |
|------------------------|--------------|-------------------|
|                        | $\Delta G^a$ | P(%) <sup>b</sup> |
| <b>7a</b>              | 1.27         | 4.19%             |
| <b>7b</b>              | 1.27         | 4.20%             |
| <b>7c</b>              | 0.00         | 36.03%            |
| <b>7d</b>              | 0.01         | 35.26%            |
| <b>7e</b>              | 1.75         | 1.87%             |
| <b>7f</b>              | 0.42         | 17.56%            |
| <b>7g</b>              | 2.19         | 0.89%             |

**Table S8** Cartesian coordinates for the low-energy optimized conformers of 2*S*, 3*R* -7 at B3LYP/6-31+G (d, p) level of theory in MeOH.

7a

Standard orientation:

| Center | Atomic | Atomic | Coordinates (Angstroms) |   |   |
|--------|--------|--------|-------------------------|---|---|
| Number | Number | Type   | X                       | Y | Z |

|    |   |   |           |           |           |
|----|---|---|-----------|-----------|-----------|
| 1  | 6 | 0 | -0.337400 | -0.400508 | 1.173269  |
| 2  | 6 | 0 | -1.024520 | 0.915016  | 0.725009  |
| 3  | 6 | 0 | -2.097472 | 0.462615  | -0.229494 |
| 4  | 6 | 0 | -2.170416 | -0.852633 | -0.451206 |
| 5  | 6 | 0 | -1.066593 | -1.445384 | 0.326915  |
| 6  | 8 | 0 | -0.786065 | -2.635871 | 0.278584  |
| 7  | 6 | 0 | -3.092231 | -1.653347 | -1.283310 |
| 8  | 8 | 0 | -2.991184 | 1.380897  | -0.728436 |
| 9  | 6 | 0 | -2.392537 | 2.161560  | -1.764798 |
| 10 | 8 | 0 | 1.091267  | -0.409631 | 0.982634  |
| 11 | 6 | 0 | -0.568958 | -0.738664 | 2.648371  |
| 12 | 6 | 0 | 1.572882  | -0.275059 | -0.280913 |
| 13 | 6 | 0 | 3.082598  | -0.417273 | -0.287350 |
| 14 | 8 | 0 | 0.889811  | -0.038130 | -1.267803 |
| 15 | 6 | 0 | 3.475209  | -1.461416 | -1.330593 |
| 16 | 6 | 0 | 3.746638  | 0.933643  | -0.579868 |
| 17 | 6 | 0 | 3.539282  | 1.944695  | 0.540755  |
| 18 | 8 | 0 | -1.637176 | 1.630538  | 1.797476  |
| 19 | 1 | 0 | -0.324151 | 1.600284  | 0.239227  |
| 20 | 1 | 0 | -3.632456 | -2.378364 | -0.666471 |
| 21 | 1 | 0 | -3.831853 | -1.023373 | -1.787101 |
| 22 | 1 | 0 | -2.538122 | -2.199020 | -2.052836 |
| 23 | 1 | 0 | -1.983285 | 1.522150  | -2.555367 |
| 24 | 1 | 0 | -1.613477 | 2.815741  | -1.360449 |
| 25 | 1 | 0 | -3.170964 | 2.792497  | -2.202490 |
| 26 | 1 | 0 | -0.108908 | 0.014374  | 3.298188  |
| 27 | 1 | 0 | -1.633569 | -0.815715 | 2.892023  |
| 28 | 1 | 0 | -0.100349 | -1.696465 | 2.902557  |
| 29 | 1 | 0 | 3.412533  | -0.784214 | 0.692666  |
| 30 | 1 | 0 | 3.198157  | -1.141624 | -2.341871 |

|    |   |   |           |           |           |
|----|---|---|-----------|-----------|-----------|
| 31 | 1 | 0 | 2.970776  | -2.414374 | -1.135895 |
| 32 | 1 | 0 | 4.555630  | -1.639735 | -1.315794 |
| 33 | 1 | 0 | 4.824735  | 0.787978  | -0.716773 |
| 34 | 1 | 0 | 3.359824  | 1.356157  | -1.514691 |
| 35 | 1 | 0 | 3.916654  | 1.558464  | 1.493137  |
| 36 | 1 | 0 | 4.075756  | 2.871700  | 0.314232  |
| 37 | 1 | 0 | 2.481340  | 2.194349  | 0.663771  |
| 38 | 1 | 0 | -2.390386 | 2.117297  | 1.413575  |

7b

Standard orientation:

| Center<br>Number | Atomic<br>Number | Atomic<br>Type | Coordinates (Angstroms) |           |           |
|------------------|------------------|----------------|-------------------------|-----------|-----------|
|                  |                  |                | X                       | Y         | Z         |
| 1                | 6                | 0              | -0.418601               | -0.808310 | 0.997931  |
| 2                | 6                | 0              | -1.130960               | 0.567804  | 1.030590  |
| 3                | 6                | 0              | -2.100754               | 0.509402  | -0.117992 |
| 4                | 6                | 0              | -2.094882               | -0.618454 | -0.835341 |
| 5                | 6                | 0              | -1.029515               | -1.452504 | -0.247764 |
| 6                | 8                | 0              | -0.691137               | -2.527956 | -0.725384 |
| 7                | 6                | 0              | -2.908179               | -1.044255 | -1.992463 |
| 8                | 8                | 0              | -2.992108               | 1.538726  | -0.305348 |
| 9                | 6                | 0              | -2.350296               | 2.663878  | -0.907702 |
| 10               | 8                | 0              | 1.018405                | -0.726457 | 0.946891  |
| 11               | 6                | 0              | -0.750431               | -1.695913 | 2.200693  |
| 12               | 6                | 0              | 1.590323                | -0.102864 | -0.117503 |
| 13               | 6                | 0              | 3.098302                | -0.255742 | -0.064594 |
| 14               | 8                | 0              | 0.974997                | 0.489170  | -0.993588 |
| 15               | 6                | 0              | 3.486995                | -1.462271 | -0.913575 |

|    |   |   |           |           |           |
|----|---|---|-----------|-----------|-----------|
| 16 | 6 | 0 | 3.807276  | 1.014868  | -0.553645 |
| 17 | 6 | 0 | 3.591502  | 2.200338  | 0.379100  |
| 18 | 8 | 0 | -1.860948 | 0.803055  | 2.234185  |
| 19 | 1 | 0 | -0.426627 | 1.397112  | 0.914560  |
| 20 | 1 | 0 | -3.462711 | -1.958268 | -1.755015 |
| 21 | 1 | 0 | -3.633653 | -0.277744 | -2.280026 |
| 22 | 1 | 0 | -2.269066 | -1.242936 | -2.858599 |
| 23 | 1 | 0 | -1.856114 | 2.382933  | -1.843927 |
| 24 | 1 | 0 | -1.632298 | 3.118902  | -0.217730 |
| 25 | 1 | 0 | -3.120419 | 3.406949  | -1.136121 |
| 26 | 1 | 0 | -0.378925 | -1.249196 | 3.129718  |
| 27 | 1 | 0 | -1.826167 | -1.875675 | 2.299085  |
| 28 | 1 | 0 | -0.257510 | -2.671619 | 2.107917  |
| 29 | 1 | 0 | 3.397421  | -0.440710 | 0.975089  |
| 30 | 1 | 0 | 3.208423  | -1.315837 | -1.963602 |
| 31 | 1 | 0 | 2.979942  | -2.367055 | -0.562063 |
| 32 | 1 | 0 | 4.566089  | -1.640550 | -0.868933 |
| 33 | 1 | 0 | 4.885155  | 0.825372  | -0.625856 |
| 34 | 1 | 0 | 3.463406  | 1.285618  | -1.559199 |
| 35 | 1 | 0 | 3.944306  | 1.972341  | 1.389794  |
| 36 | 1 | 0 | 4.147073  | 3.071111  | 0.015450  |
| 37 | 1 | 0 | 2.535362  | 2.478016  | 0.437845  |
| 38 | 1 | 0 | -2.602043 | 1.393067  | 2.001159  |

7c

Standard orientation:

| Center | Atomic | Atomic | Coordinates (Angstroms) |   |   |
|--------|--------|--------|-------------------------|---|---|
| Number | Number | Type   | X                       | Y | Z |

|    |   |   |           |           |           |
|----|---|---|-----------|-----------|-----------|
| 1  | 6 | 0 | 0.265275  | 0.499076  | 0.393675  |
| 2  | 6 | 0 | 1.093924  | -0.779347 | 0.102777  |
| 3  | 6 | 0 | 2.475173  | -0.273049 | -0.233464 |
| 4  | 6 | 0 | 2.550385  | 1.050919  | -0.405505 |
| 5  | 6 | 0 | 1.197544  | 1.572768  | -0.145659 |
| 6  | 8 | 0 | 0.894792  | 2.742614  | -0.343680 |
| 7  | 6 | 0 | 3.671469  | 1.912349  | -0.838052 |
| 8  | 8 | 0 | 3.532852  | -1.097503 | -0.547614 |
| 9  | 6 | 0 | 3.614918  | -2.315604 | 0.184667  |
| 10 | 8 | 0 | -0.972340 | 0.554520  | -0.338249 |
| 11 | 6 | 0 | 0.027748  | 0.819777  | 1.876192  |
| 12 | 6 | 0 | -1.846097 | -0.468319 | -0.140526 |
| 13 | 6 | 0 | -3.135814 | -0.219779 | -0.897306 |
| 14 | 8 | 0 | -1.616896 | -1.451371 | 0.552934  |
| 15 | 6 | 0 | -3.394609 | -1.403254 | -1.827673 |
| 16 | 6 | 0 | -4.300836 | -0.017378 | 0.078982  |
| 17 | 6 | 0 | -4.170221 | 1.265522  | 0.889822  |
| 18 | 8 | 0 | 1.099917  | -1.659367 | 1.221039  |
| 19 | 1 | 0 | 0.708569  | -1.330088 | -0.763976 |
| 20 | 1 | 0 | 3.898593  | 2.657529  | -0.069722 |
| 21 | 1 | 0 | 4.582045  | 1.332458  | -1.021295 |
| 22 | 1 | 0 | 3.418536  | 2.437740  | -1.764689 |
| 23 | 1 | 0 | 2.811585  | -3.000143 | -0.102476 |
| 24 | 1 | 0 | 3.619790  | -2.129116 | 1.263105  |
| 25 | 1 | 0 | 4.564434  | -2.795100 | -0.074329 |
| 26 | 1 | 0 | -0.599488 | 0.067310  | 2.363769  |
| 27 | 1 | 0 | 0.968790  | 0.893422  | 2.432734  |
| 28 | 1 | 0 | -0.499569 | 1.774912  | 1.981532  |
| 29 | 1 | 0 | -3.020966 | 0.677786  | -1.518679 |
| 30 | 1 | 0 | -3.544781 | -2.331226 | -1.264124 |

|    |   |   |           |           |           |
|----|---|---|-----------|-----------|-----------|
| 31 | 1 | 0 | -2.545887 | -1.559933 | -2.501513 |
| 32 | 1 | 0 | -4.285826 | -1.229000 | -2.439870 |
| 33 | 1 | 0 | -5.243224 | 0.022594  | -0.480765 |
| 34 | 1 | 0 | -4.374989 | -0.867040 | 0.768284  |
| 35 | 1 | 0 | -4.097287 | 2.138807  | 0.234395  |
| 36 | 1 | 0 | -5.047109 | 1.395632  | 1.532201  |
| 37 | 1 | 0 | -3.286049 | 1.242096  | 1.534505  |
| 38 | 1 | 0 | 0.173076  | -1.971881 | 1.307899  |

7d

Standard orientation:

| Center | Atomic | Atomic | Coordinates (Angstroms) |           |           |
|--------|--------|--------|-------------------------|-----------|-----------|
| Number | Number | Type   | X                       | Y         | Z         |
| 1      | 6      | 0      | -0.303143               | 0.523088  | -0.460726 |
| 2      | 6      | 0      | -1.057230               | -0.772386 | -0.064718 |
| 3      | 6      | 0      | -2.465978               | -0.321483 | 0.232303  |
| 4      | 6      | 0      | -2.617718               | 1.005602  | 0.296862  |
| 5      | 6      | 0      | -1.296877               | 1.581026  | -0.008526 |
| 6      | 8      | 0      | -1.062457               | 2.778872  | 0.091634  |
| 7      | 6      | 0      | -3.787714               | 1.834758  | 0.660312  |
| 8      | 8      | 0      | -3.475793               | -1.175778 | 0.615464  |
| 9      | 6      | 0      | -3.486007               | -2.453071 | -0.012283 |
| 10     | 8      | 0      | 0.926891                | 0.707997  | 0.262206  |
| 11     | 6      | 0      | -0.079293               | 0.734680  | -1.963665 |
| 12     | 6      | 0      | 1.860249                | -0.273718 | 0.141943  |
| 13     | 6      | 0      | 3.121275                | 0.099462  | 0.898512  |
| 14     | 8      | 0      | 1.687049                | -1.323144 | -0.464720 |
| 15     | 6      | 0      | 3.087418                | -0.590133 | 2.258400  |

|    |   |   |           |           |           |
|----|---|---|-----------|-----------|-----------|
| 16 | 6 | 0 | 4.377067  | -0.293805 | 0.108321  |
| 17 | 6 | 0 | 4.536718  | 0.512519  | -1.174396 |
| 18 | 8 | 0 | -1.011004 | -1.738861 | -1.107876 |
| 19 | 1 | 0 | -0.644237 | -1.228654 | 0.843074  |
| 20 | 1 | 0 | -4.055739 | 2.499497  | -0.166229 |
| 21 | 1 | 0 | -4.663779 | 1.220284  | 0.892470  |
| 22 | 1 | 0 | -3.567123 | 2.447219  | 1.539567  |
| 23 | 1 | 0 | -2.643865 | -3.063403 | 0.327688  |
| 24 | 1 | 0 | -3.499480 | -2.357288 | -1.103080 |
| 25 | 1 | 0 | -4.406474 | -2.963948 | 0.287529  |
| 26 | 1 | 0 | 0.589248  | -0.019807 | -2.389884 |
| 27 | 1 | 0 | -1.021146 | 0.711792  | -2.522672 |
| 28 | 1 | 0 | 0.395964  | 1.705769  | -2.147656 |
| 29 | 1 | 0 | 3.132295  | 1.186612  | 1.051355  |
| 30 | 1 | 0 | 3.081204  | -1.681270 | 2.151502  |
| 31 | 1 | 0 | 2.186986  | -0.309956 | 2.816122  |
| 32 | 1 | 0 | 3.959017  | -0.310539 | 2.859347  |
| 33 | 1 | 0 | 5.265092  | -0.129419 | 0.732205  |
| 34 | 1 | 0 | 4.356949  | -1.361647 | -0.141534 |
| 35 | 1 | 0 | 4.580772  | 1.585254  | -0.959528 |
| 36 | 1 | 0 | 5.464294  | 0.230768  | -1.681901 |
| 37 | 1 | 0 | 3.708051  | 0.332997  | -1.866026 |
| 38 | 1 | 0 | -0.068115 | -2.006172 | -1.170053 |

7e

Standard orientation:

| Center | Atomic | Atomic | Coordinates (Angstroms) |   |   |
|--------|--------|--------|-------------------------|---|---|
| Number | Number | Type   | X                       | Y | Z |

|    |   |   |           |           |           |
|----|---|---|-----------|-----------|-----------|
| 1  | 6 | 0 | 0.193576  | -0.051238 | 1.119526  |
| 2  | 6 | 0 | 1.280042  | -1.009511 | 0.567040  |
| 3  | 6 | 0 | 2.230930  | -0.104948 | -0.169053 |
| 4  | 6 | 0 | 1.919545  | 1.194325  | -0.177039 |
| 5  | 6 | 0 | 0.635189  | 1.294383  | 0.542712  |
| 6  | 8 | 0 | 0.015398  | 2.345226  | 0.646985  |
| 7  | 6 | 0 | 2.613239  | 2.361940  | -0.756426 |
| 8  | 8 | 0 | 3.393513  | -0.624435 | -0.688446 |
| 9  | 6 | 0 | 3.135270  | -1.331355 | -1.902213 |
| 10 | 8 | 0 | -1.151139 | -0.413526 | 0.752140  |
| 11 | 6 | 0 | 0.197846  | 0.062471  | 2.645639  |
| 12 | 6 | 0 | -1.474487 | -0.449119 | -0.566638 |
| 13 | 6 | 0 | -2.951549 | -0.726321 | -0.770016 |
| 14 | 8 | 0 | -0.678079 | -0.303786 | -1.483829 |
| 15 | 6 | 0 | -3.284726 | -2.127040 | -0.259948 |
| 16 | 6 | 0 | -3.835958 | 0.335337  | -0.102367 |
| 17 | 6 | 0 | -3.657641 | 1.716614  | -0.718436 |
| 18 | 8 | 0 | 2.001515  | -1.699273 | 1.587049  |
| 19 | 1 | 0 | 0.858014  | -1.769184 | -0.097832 |
| 20 | 1 | 0 | 2.864094  | 3.085900  | 0.024957  |
| 21 | 1 | 0 | 3.542751  | 2.071617  | -1.255856 |
| 22 | 1 | 0 | 1.976587  | 2.858165  | -1.495503 |
| 23 | 1 | 0 | 2.618376  | -0.695190 | -2.629086 |
| 24 | 1 | 0 | 2.556182  | -2.240445 | -1.709557 |
| 25 | 1 | 0 | 4.098144  | -1.626987 | -2.330146 |
| 26 | 1 | 0 | -0.059466 | -0.896061 | 3.109489  |
| 27 | 1 | 0 | 1.167348  | 0.395426  | 3.033308  |
| 28 | 1 | 0 | -0.558537 | 0.782548  | 2.981657  |
| 29 | 1 | 0 | -3.136000 | -0.709339 | -1.851606 |
| 30 | 1 | 0 | -3.165294 | -2.198504 | 0.826773  |

|    |   |   |           |           |           |
|----|---|---|-----------|-----------|-----------|
| 31 | 1 | 0 | -2.625593 | -2.874430 | -0.713671 |
| 32 | 1 | 0 | -4.318588 | -2.393397 | -0.503656 |
| 33 | 1 | 0 | -4.888768 | 0.046144  | -0.202867 |
| 34 | 1 | 0 | -3.625539 | 0.395522  | 0.972527  |
| 35 | 1 | 0 | -3.877126 | 1.698939  | -1.789902 |
| 36 | 1 | 0 | -4.338853 | 2.430270  | -0.244328 |
| 37 | 1 | 0 | -2.637298 | 2.087759  | -0.581498 |
| 38 | 1 | 0 | 2.892263  | -1.875641 | 1.228915  |

7f

Standard orientation:

| Center | Atomic | Atomic | Coordinates (Angstroms) |           |           |
|--------|--------|--------|-------------------------|-----------|-----------|
| Number | Number | Type   | X                       | Y         | Z         |
| 1      | 6      | 0      | -0.221769               | 0.544353  | -0.659241 |
| 2      | 6      | 0      | -0.975796               | -0.750069 | -0.259576 |
| 3      | 6      | 0      | -2.276432               | -0.268793 | 0.335848  |
| 4      | 6      | 0      | -2.327723               | 1.048605  | 0.556214  |
| 5      | 6      | 0      | -1.047723               | 1.592262  | 0.070042  |
| 6      | 8      | 0      | -0.721792               | 2.760582  | 0.243392  |
| 7      | 6      | 0      | -3.357207               | 1.885187  | 1.210149  |
| 8      | 8      | 0      | -3.253772               | -1.113899 | 0.812781  |
| 9      | 6      | 0      | -3.456535               | -2.315057 | 0.078465  |
| 10     | 8      | 0      | 1.126189                | 0.596023  | -0.159869 |
| 11     | 6      | 0      | -0.256357               | 0.907885  | -2.149322 |
| 12     | 6      | 0      | 1.958020                | -0.411023 | -0.535373 |
| 13     | 6      | 0      | 3.362963                | -0.203875 | -0.004999 |
| 14     | 8      | 0      | 1.615457                | -1.376759 | -1.208200 |
| 15     | 6      | 0      | 3.968141                | 1.050744  | -0.631559 |

|    |   |   |           |           |           |
|----|---|---|-----------|-----------|-----------|
| 16 | 6 | 0 | 3.395371  | -0.133011 | 1.527499  |
| 17 | 6 | 0 | 2.946472  | -1.431437 | 2.185331  |
| 18 | 8 | 0 | -1.180143 | -1.598809 | -1.383106 |
| 19 | 1 | 0 | -0.436513 | -1.320343 | 0.506308  |
| 20 | 1 | 0 | -3.724233 | 2.648200  | 0.515936  |
| 21 | 1 | 0 | -4.214935 | 1.291385  | 1.538401  |
| 22 | 1 | 0 | -2.942199 | 2.389083  | 2.088534  |
| 23 | 1 | 0 | -2.607105 | -2.995127 | 0.198263  |
| 24 | 1 | 0 | -3.658517 | -2.105200 | -0.976352 |
| 25 | 1 | 0 | -4.338275 | -2.813633 | 0.493184  |
| 26 | 1 | 0 | 0.276351  | 0.174109  | -2.763067 |
| 27 | 1 | 0 | -1.282376 | 0.988264  | -2.526142 |
| 28 | 1 | 0 | 0.240129  | 1.869638  | -2.321740 |
| 29 | 1 | 0 | 3.960449  | -1.065243 | -0.331296 |
| 30 | 1 | 0 | 3.442171  | 1.955858  | -0.308970 |
| 31 | 1 | 0 | 3.908808  | 1.006694  | -1.724623 |
| 32 | 1 | 0 | 5.021832  | 1.153740  | -0.352890 |
| 33 | 1 | 0 | 4.417516  | 0.086606  | 1.858641  |
| 34 | 1 | 0 | 2.762170  | 0.686156  | 1.891430  |
| 35 | 1 | 0 | 3.563357  | -2.272259 | 1.853162  |
| 36 | 1 | 0 | 3.037701  | -1.352811 | 3.272640  |
| 37 | 1 | 0 | 1.900500  | -1.657593 | 1.952847  |
| 38 | 1 | 0 | -0.282896 | -1.899245 | -1.645111 |

7g

Standard orientation:

| Center | Atomic | Atomic | Coordinates (Angstroms) |   |   |
|--------|--------|--------|-------------------------|---|---|
| Number | Number | Type   | X                       | Y | Z |

|    |   |   |           |           |           |
|----|---|---|-----------|-----------|-----------|
| 1  | 6 | 0 | -0.398127 | -0.812778 | 0.972542  |
| 2  | 6 | 0 | -1.007862 | 0.612080  | 0.993012  |
| 3  | 6 | 0 | -2.078441 | 0.570817  | -0.064801 |
| 4  | 6 | 0 | -2.213821 | -0.585962 | -0.719391 |
| 5  | 6 | 0 | -1.160152 | -1.467277 | -0.181248 |
| 6  | 8 | 0 | -0.940407 | -2.586890 | -0.627118 |
| 7  | 6 | 0 | -3.153386 | -1.005531 | -1.778669 |
| 8  | 8 | 0 | -2.911472 | 1.652719  | -0.228596 |
| 9  | 6 | 0 | -2.249259 | 2.700362  | -0.938711 |
| 10 | 8 | 0 | 1.031092  | -0.835626 | 0.797402  |
| 11 | 6 | 0 | -0.682760 | -1.616263 | 2.244668  |
| 12 | 6 | 0 | 1.550561  | -0.305389 | -0.342553 |
| 13 | 6 | 0 | 3.053441  | -0.523461 | -0.382451 |
| 14 | 8 | 0 | 0.899423  | 0.281183  | -1.195149 |
| 15 | 6 | 0 | 3.593512  | -0.333429 | -1.798696 |
| 16 | 6 | 0 | 3.767345  | 0.356553  | 0.654101  |
| 17 | 6 | 0 | 3.654721  | 1.855812  | 0.402492  |
| 18 | 8 | 0 | -1.610824 | 0.956244  | 2.240326  |
| 19 | 1 | 0 | -0.262709 | 1.382004  | 0.773046  |
| 20 | 1 | 0 | -3.745523 | -1.864293 | -1.447081 |
| 21 | 1 | 0 | -3.847571 | -0.202165 | -2.043857 |
| 22 | 1 | 0 | -2.609355 | -1.289485 | -2.684371 |
| 23 | 1 | 0 | -1.857353 | 2.342516  | -1.897251 |
| 24 | 1 | 0 | -1.445221 | 3.133727  | -0.335235 |
| 25 | 1 | 0 | -2.983130 | 3.485137  | -1.140650 |
| 26 | 1 | 0 | -0.200462 | -1.153871 | 3.113275  |
| 27 | 1 | 0 | -1.755634 | -1.713032 | 2.442005  |
| 28 | 1 | 0 | -0.267695 | -2.628834 | 2.161766  |
| 29 | 1 | 0 | 3.225892  | -1.575992 | -0.118315 |
| 30 | 1 | 0 | 3.382681  | 0.667996  | -2.188009 |

|    |   |   |           |           |           |
|----|---|---|-----------|-----------|-----------|
| 31 | 1 | 0 | 3.126812  | -1.049715 | -2.485120 |
| 32 | 1 | 0 | 4.675243  | -0.494661 | -1.828537 |
| 33 | 1 | 0 | 3.365610  | 0.145146  | 1.652894  |
| 34 | 1 | 0 | 4.829950  | 0.086033  | 0.683348  |
| 35 | 1 | 0 | 2.611242  | 2.180536  | 0.373003  |
| 36 | 1 | 0 | 4.152302  | 2.406031  | 1.208746  |
| 37 | 1 | 0 | 4.135801  | 2.143059  | -0.536747 |
| 38 | 1 | 0 | -2.328002 | 1.585631  | 2.040406  |

**Table S9** Gibbs free energies and Boltzmann-population of low-energy conformers of 2*S*, 3*S* -**8**.

| Conformers of Compound | In MeOH      |                   |
|------------------------|--------------|-------------------|
|                        | $\Delta G^a$ | P(%) <sup>b</sup> |
| <b>8a</b>              | 0.00         | 49.61%            |
| <b>8b</b>              | 0.00         | 49.58%            |
| <b>8c</b>              | 2.43         | 0.82%             |

**Table S10** Cartesian coordinates for the low-energy optimized conformers of 2*S*, 3*S* -**8** at B3LYP/6-31+G (d, p) level of theory in MeOH.

8a

Standard orientation:

| Center | Atomic | Atomic | Coordinates (Angstroms) |           |           |
|--------|--------|--------|-------------------------|-----------|-----------|
| Number | Number | Type   | X                       | Y         | Z         |
| 1      | 6      | 0      | 1.391185                | -0.068161 | 0.100707  |
| 2      | 6      | 0      | -0.016836               | 0.485542  | 0.443857  |
| 3      | 6      | 0      | -0.968180               | -0.649021 | 0.131130  |
| 4      | 6      | 0      | -0.377994               | -1.782333 | -0.262738 |
| 5      | 6      | 0      | 1.060428                | -1.500222 | -0.288327 |

|    |   |   |           |           |           |
|----|---|---|-----------|-----------|-----------|
| 6  | 8 | 0 | 1.879521  | -2.330397 | -0.660515 |
| 7  | 8 | 0 | -2.308479 | -0.405137 | 0.295365  |
| 8  | 6 | 0 | -3.191150 | -1.507178 | 0.106536  |
| 9  | 8 | 0 | -0.140670 | 0.747653  | 1.850798  |
| 10 | 6 | 0 | -0.375118 | 1.764415  | -0.340101 |
| 11 | 6 | 0 | -0.709748 | 1.670009  | -1.807754 |
| 12 | 8 | 0 | -0.447938 | 2.847528  | 0.256159  |
| 13 | 8 | 0 | 1.994912  | 0.549226  | -1.042592 |
| 14 | 6 | 0 | 2.394339  | -0.043607 | 1.249793  |
| 15 | 1 | 0 | -0.798606 | -2.732194 | -0.536959 |
| 16 | 1 | 0 | -2.968865 | -2.311920 | 0.813930  |
| 17 | 1 | 0 | -4.211152 | -1.158411 | 0.296353  |
| 18 | 1 | 0 | -3.144213 | -1.871116 | -0.925689 |
| 19 | 1 | 0 | -0.333931 | 1.706924  | 1.923949  |
| 20 | 1 | 0 | -0.158247 | 0.865046  | -2.294891 |
| 21 | 1 | 0 | -1.782922 | 1.493417  | -1.922185 |
| 22 | 1 | 0 | -0.441865 | 2.609511  | -2.298724 |
| 23 | 1 | 0 | 2.782860  | 0.014351  | -1.265533 |
| 24 | 1 | 0 | 2.592939  | 0.984908  | 1.566890  |
| 25 | 1 | 0 | 3.356891  | -0.465777 | 0.938039  |
| 26 | 1 | 0 | 2.046795  | -0.622390 | 2.112487  |

8b

Standard orientation:

| Center<br>Number | Atomic<br>Number | Atomic<br>Type | Coordinates (Angstroms) |           |          |
|------------------|------------------|----------------|-------------------------|-----------|----------|
|                  |                  |                | X                       | Y         | Z        |
| 1                | 6                | 0              | 1.392155                | -0.000108 | 0.116029 |
| 2                | 6                | 0              | -0.045985               | 0.477735  | 0.447613 |

|    |   |   |           |           |           |
|----|---|---|-----------|-----------|-----------|
| 3  | 6 | 0 | -0.934695 | -0.698024 | 0.102708  |
| 4  | 6 | 0 | -0.281446 | -1.802615 | -0.273393 |
| 5  | 6 | 0 | 1.143091  | -1.452648 | -0.257109 |
| 6  | 8 | 0 | 2.011008  | -2.247658 | -0.593210 |
| 7  | 8 | 0 | -2.289351 | -0.515377 | 0.228653  |
| 8  | 6 | 0 | -3.115162 | -1.653367 | 0.001876  |
| 9  | 8 | 0 | -0.201248 | 0.694916  | 1.859683  |
| 10 | 6 | 0 | -0.489510 | 1.747231  | -0.310196 |
| 11 | 6 | 0 | -0.548993 | 1.745149  | -1.817500 |
| 12 | 8 | 0 | -0.819447 | 2.758007  | 0.325567  |
| 13 | 8 | 0 | 1.966180  | 0.626924  | -1.037217 |
| 14 | 6 | 0 | 2.389302  | 0.098149  | 1.265872  |
| 15 | 1 | 0 | -0.648460 | -2.771057 | -0.558178 |
| 16 | 1 | 0 | -2.881035 | -2.454422 | 0.711096  |
| 17 | 1 | 0 | -4.154895 | -1.352490 | 0.160830  |
| 18 | 1 | 0 | -3.017004 | -2.006012 | -1.030037 |
| 19 | 1 | 0 | -0.730218 | 1.516851  | 1.940677  |
| 20 | 1 | 0 | -0.490195 | 0.731842  | -2.221135 |
| 21 | 1 | 0 | -1.501919 | 2.177443  | -2.135084 |
| 22 | 1 | 0 | 0.275360  | 2.341525  | -2.213970 |
| 23 | 1 | 0 | 2.783927  | 0.130460  | -1.245807 |
| 24 | 1 | 0 | 2.522315  | 1.140819  | 1.572749  |
| 25 | 1 | 0 | 3.376412  | -0.267143 | 0.961015  |
| 26 | 1 | 0 | 2.076039  | -0.491319 | 2.134636  |

-----

8c

Standard orientation:

-----

| Center | Atomic | Atomic | Coordinates (Angstroms) |   |   |
|--------|--------|--------|-------------------------|---|---|
| Number | Number | Type   | X                       | Y | Z |

|    |   |   |           |           |           |
|----|---|---|-----------|-----------|-----------|
| 1  | 6 | 0 | 1.268532  | -0.482012 | 0.220082  |
| 2  | 6 | 0 | 0.071222  | 0.487932  | 0.399232  |
| 3  | 6 | 0 | -1.145251 | -0.373109 | 0.116289  |
| 4  | 6 | 0 | -0.878624 | -1.577328 | -0.402028 |
| 5  | 6 | 0 | 0.584162  | -1.659672 | -0.460852 |
| 6  | 8 | 0 | 1.171722  | -2.590396 | -0.997152 |
| 7  | 8 | 0 | -2.366945 | 0.171058  | 0.432760  |
| 8  | 6 | 0 | -3.513577 | -0.579119 | 0.040931  |
| 9  | 8 | 0 | -0.055978 | 0.978593  | 1.734548  |
| 10 | 6 | 0 | 0.148237  | 1.655878  | -0.612172 |
| 11 | 6 | 0 | 0.975888  | 2.851364  | -0.204712 |
| 12 | 8 | 0 | -0.435279 | 1.644976  | -1.700369 |
| 13 | 8 | 0 | 2.317600  | 0.017175  | -0.607824 |
| 14 | 6 | 0 | 1.889920  | -0.958164 | 1.533220  |
| 15 | 1 | 0 | -1.532640 | -2.371168 | -0.709542 |
| 16 | 1 | 0 | -3.548296 | -1.540356 | 0.563762  |
| 17 | 1 | 0 | -4.403204 | -0.007341 | 0.323100  |
| 18 | 1 | 0 | -3.533157 | -0.724518 | -1.044485 |
| 19 | 1 | 0 | -0.991156 | 1.245115  | 1.834738  |
| 20 | 1 | 0 | 1.937461  | 2.528682  | 0.201140  |
| 21 | 1 | 0 | 1.165171  | 3.480631  | -1.078655 |
| 22 | 1 | 0 | 0.431295  | 3.432556  | 0.543149  |
| 23 | 1 | 0 | 2.827429  | -0.761954 | -0.909813 |
| 24 | 1 | 0 | 2.375185  | -0.127523 | 2.057612  |
| 25 | 1 | 0 | 2.669996  | -1.705860 | 1.344349  |
| 26 | 1 | 0 | 1.149912  | -1.414115 | 2.198998  |

**Table S11** Gibbs free energies and Boltzmann-population of low-energy conformers of 2*S*, 3*R* -8.

| Conformers of Compound | In MeOH      |                   |
|------------------------|--------------|-------------------|
|                        | $\Delta G^a$ | P(%) <sup>b</sup> |
| <b>8a</b>              | 0.00         | 100.00%           |

**Table S12** Cartesian coordinates for the low-energy optimized conformers of 2*S*, 3*R*-**8** at B3LYP/6-31+G (d, p) level of theory in MeOH.

8a

Standard orientation:

| Center<br>Number | Atomic<br>Number | Atomic<br>Type | Coordinates (Angstroms) |           |           |
|------------------|------------------|----------------|-------------------------|-----------|-----------|
|                  |                  |                | X                       | Y         | Z         |
| 1                | 6                | 0              | -1.373055               | -0.041665 | 0.022234  |
| 2                | 6                | 0              | 0.052481                | 0.463661  | 0.380417  |
| 3                | 6                | 0              | 0.958017                | -0.713502 | 0.083989  |
| 4                | 6                | 0              | 0.319962                | -1.846146 | -0.235052 |
| 5                | 6                | 0              | -1.109102               | -1.526777 | -0.170931 |
| 6                | 8                | 0              | -1.981906               | -2.382105 | -0.248339 |
| 7                | 8                | 0              | 2.310924                | -0.508273 | 0.204085  |
| 8                | 6                | 0              | 3.155407                | -1.624278 | -0.054816 |
| 9                | 8                | 0              | 0.132100                | 0.705826  | 1.791120  |
| 10               | 6                | 0              | 0.483569                | 1.684429  | -0.457794 |
| 11               | 6                | 0              | 0.654416                | 2.991860  | 0.271510  |
| 12               | 8                | 0              | 0.660982                | 1.624494  | -1.678780 |
| 13               | 8                | 0              | -2.268133               | 0.181373  | 1.125062  |
| 14               | 6                | 0              | -2.030690               | 0.498108  | -1.244970 |
| 15               | 1                | 0              | 0.701397                | -2.825286 | -0.457622 |
| 16               | 1                | 0              | 3.037126                | -1.973680 | -1.086068 |
| 17               | 1                | 0              | 4.191488                | -1.300108 | 0.076814  |
| 18               | 1                | 0              | 2.961263                | -2.434429 | 0.655801  |

|    |   |   |           |           |           |
|----|---|---|-----------|-----------|-----------|
| 19 | 1 | 0 | -0.795037 | 0.820769  | 2.088295  |
| 20 | 1 | 0 | 0.905724  | 3.781473  | -0.443636 |
| 21 | 1 | 0 | -0.279851 | 3.259980  | 0.771488  |
| 22 | 1 | 0 | 1.467103  | 2.906920  | 0.997669  |
| 23 | 1 | 0 | -3.021552 | -0.429965 | 0.986125  |
| 24 | 1 | 0 | -1.455863 | 0.266349  | -2.146528 |
| 25 | 1 | 0 | -2.181650 | 1.581764  | -1.179800 |
| 26 | 1 | 0 | -3.027917 | 0.061558  | -1.375238 |

**Table S13** Gibbs free energies and Boltzmann-population of low-energy conformers of 2*R*, 3*R* -**9**.

| Conformers of Compound | In MeOH      |                   |
|------------------------|--------------|-------------------|
|                        | $\Delta G^a$ | P(%) <sup>b</sup> |
| <b>9a</b>              | 0.02         | 22.40%            |
| <b>9b</b>              | 1.09         | 3.66%             |
| <b>9c</b>              | 0.36         | 12.67%            |
| <b>9d</b>              | 0.00         | 23.17%            |
| <b>9e</b>              | 0.05         | 21.22%            |
| <b>9f</b>              | 0.52         | 9.57%             |
| <b>9g</b>              | 0.68         | 7.31%             |

**Table S14** Cartesian coordinates for the low-energy optimized conformers of 2*R*, 3*R* -**9** at B3LYP/6-31+G (d, p) level of theory in MeOH.

9a

Standard orientation:

| Center | Atomic | Atomic | Coordinates (Angstroms) |           |          |
|--------|--------|--------|-------------------------|-----------|----------|
| Number | Number | Type   | X                       | Y         | Z        |
| 1      | 6      | 0      | -1.873607               | -0.562514 | 0.344815 |

|    |   |   |           |           |           |
|----|---|---|-----------|-----------|-----------|
| 2  | 6 | 0 | -1.012181 | -0.798839 | -0.902655 |
| 3  | 6 | 0 | -0.273102 | 0.517304  | -1.276697 |
| 4  | 6 | 0 | -1.222601 | 1.698929  | -1.381710 |
| 5  | 6 | 0 | -2.080333 | 1.841720  | -0.147536 |
| 6  | 6 | 0 | -2.384356 | 0.638565  | 0.687438  |
| 7  | 6 | 0 | -3.307981 | 0.880703  | 1.844163  |
| 8  | 8 | 0 | -2.232127 | -1.706612 | 1.049653  |
| 9  | 8 | 0 | -2.576177 | 2.931702  | 0.139758  |
| 10 | 6 | 0 | -1.966814 | -1.256155 | -2.026177 |
| 11 | 8 | 0 | -0.042403 | -1.816147 | -0.583758 |
| 12 | 6 | 0 | 0.578871  | -2.477423 | -1.676066 |
| 13 | 8 | 0 | 0.702633  | 0.856733  | -0.253332 |
| 14 | 6 | 0 | 2.009054  | 0.578929  | -0.509271 |
| 15 | 6 | 0 | 2.861958  | 0.955467  | 0.689053  |
| 16 | 6 | 0 | 3.813359  | -0.186174 | 1.070866  |
| 17 | 6 | 0 | 3.077939  | -1.400556 | 1.620643  |
| 18 | 6 | 0 | 3.634373  | 2.226196  | 0.347801  |
| 19 | 8 | 0 | 2.444362  | 0.124560  | -1.557726 |
| 20 | 6 | 0 | -1.349047 | -1.944902 | 2.147854  |
| 21 | 1 | 0 | 0.232622  | 0.405793  | -2.243746 |
| 22 | 1 | 0 | -0.642011 | 2.624018  | -1.485800 |
| 23 | 1 | 0 | -1.884523 | 1.605568  | -2.248574 |
| 24 | 1 | 0 | -2.834707 | 1.543316  | 2.575839  |
| 25 | 1 | 0 | -3.588910 | -0.040456 | 2.363401  |
| 26 | 1 | 0 | -4.237830 | 1.348280  | 1.502247  |
| 27 | 1 | 0 | -2.365988 | -2.256115 | -1.817298 |
| 28 | 1 | 0 | -2.816442 | -0.577256 | -2.155720 |
| 29 | 1 | 0 | -1.448836 | -1.316856 | -2.989323 |
| 30 | 1 | 0 | -0.105048 | -3.212487 | -2.110318 |
| 31 | 1 | 0 | 0.913823  | -1.778884 | -2.446660 |

|    |   |   |           |           |           |
|----|---|---|-----------|-----------|-----------|
| 32 | 1 | 0 | 1.449832  | -3.017787 | -1.294702 |
| 33 | 1 | 0 | 2.205004  | 1.166537  | 1.543290  |
| 34 | 1 | 0 | 4.515685  | 0.166628  | 1.837227  |
| 35 | 1 | 0 | 4.413291  | -0.493535 | 0.206468  |
| 36 | 1 | 0 | 3.795425  | -2.166745 | 1.930721  |
| 37 | 1 | 0 | 2.419928  | -1.843653 | 0.867547  |
| 38 | 1 | 0 | 2.471763  | -1.131980 | 2.492016  |
| 39 | 1 | 0 | 4.318925  | 2.064567  | -0.492399 |
| 40 | 1 | 0 | 4.222321  | 2.567683  | 1.206051  |
| 41 | 1 | 0 | 2.949896  | 3.033369  | 0.064921  |
| 42 | 1 | 0 | -1.358762 | -1.107989 | 2.854364  |
| 43 | 1 | 0 | -1.703997 | -2.835342 | 2.673578  |
| 44 | 1 | 0 | -0.324955 | -2.136067 | 1.814984  |

9b

Standard orientation:

| Center<br>Number | Atomic<br>Number | Atomic<br>Type | Coordinates (Angstroms) |           |           |
|------------------|------------------|----------------|-------------------------|-----------|-----------|
|                  |                  |                | X                       | Y         | Z         |
| 1                | 6                | 0              | 1.790646                | 0.631751  | 0.299310  |
| 2                | 6                | 0              | 0.943102                | 0.749524  | -0.974481 |
| 3                | 6                | 0              | 0.304162                | -0.631353 | -1.298675 |
| 4                | 6                | 0              | 1.336360                | -1.746994 | -1.330419 |
| 5                | 6                | 0              | 2.172521                | -1.773323 | -0.072609 |
| 6                | 6                | 0              | 2.373629                | -0.513538 | 0.709196  |
| 7                | 6                | 0              | 3.284161                | -0.637133 | 1.896058  |
| 8                | 8                | 0              | 2.059899                | 1.829751  | 0.954747  |
| 9                | 8                | 0              | 2.734971                | -2.811437 | 0.275844  |
| 10               | 6                | 0              | 1.887146                | 1.221074  | -2.098647 |

|    |   |   |           |           |           |
|----|---|---|-----------|-----------|-----------|
| 11 | 8 | 0 | -0.101701 | 1.709300  | -0.720069 |
| 12 | 6 | 0 | -0.742018 | 2.276047  | -1.854672 |
| 13 | 8 | 0 | -0.664701 | -0.991434 | -0.276342 |
| 14 | 6 | 0 | -1.983307 | -0.804781 | -0.559015 |
| 15 | 6 | 0 | -2.823986 | -1.160372 | 0.656902  |
| 16 | 6 | 0 | -2.577761 | -0.179354 | 1.814516  |
| 17 | 6 | 0 | -3.075051 | 1.238773  | 1.564950  |
| 18 | 6 | 0 | -4.300983 | -1.281642 | 0.286061  |
| 19 | 8 | 0 | -2.425680 | -0.433539 | -1.637225 |
| 20 | 6 | 0 | 1.133956  | 2.066822  | 2.016922  |
| 21 | 1 | 0 | -0.187247 | -0.600721 | -2.278126 |
| 22 | 1 | 0 | 0.824133  | -2.713852 | -1.402975 |
| 23 | 1 | 0 | 2.010775  | -1.646062 | -2.186331 |
| 24 | 1 | 0 | 2.842312  | -1.302588 | 2.644192  |
| 25 | 1 | 0 | 3.481680  | 0.323043  | 2.381781  |
| 26 | 1 | 0 | 4.253441  | -1.047008 | 1.594330  |
| 27 | 1 | 0 | 2.211649  | 2.255566  | -1.931267 |
| 28 | 1 | 0 | 2.784828  | 0.598363  | -2.180596 |
| 29 | 1 | 0 | 1.388409  | 1.200119  | -3.074213 |
| 30 | 1 | 0 | -1.010157 | 1.522880  | -2.598725 |
| 31 | 1 | 0 | -1.656794 | 2.770971  | -1.515407 |
| 32 | 1 | 0 | -0.100497 | 3.036929  | -2.307788 |
| 33 | 1 | 0 | -2.496058 | -2.158813 | 0.978586  |
| 34 | 1 | 0 | -1.505238 | -0.135177 | 2.038864  |
| 35 | 1 | 0 | -3.066510 | -0.564237 | 2.718923  |
| 36 | 1 | 0 | -2.795084 | 1.883888  | 2.404161  |
| 37 | 1 | 0 | -4.164494 | 1.271189  | 1.473727  |
| 38 | 1 | 0 | -2.637742 | 1.663495  | 0.657759  |
| 39 | 1 | 0 | -4.692938 | -0.355558 | -0.147310 |
| 40 | 1 | 0 | -4.904444 | -1.535865 | 1.162859  |

|    |   |   |           |           |           |
|----|---|---|-----------|-----------|-----------|
| 41 | 1 | 0 | -4.444039 | -2.070705 | -0.461388 |
| 42 | 1 | 0 | 1.130451  | 1.241608  | 2.736947  |
| 43 | 1 | 0 | 1.454476  | 2.971022  | 2.541716  |
| 44 | 1 | 0 | 0.121323  | 2.237394  | 1.642259  |

9c

Standard orientation:

| Center<br>Number | Atomic<br>Number | Atomic<br>Type | Coordinates (Angstroms) |           |           |
|------------------|------------------|----------------|-------------------------|-----------|-----------|
|                  |                  |                | X                       | Y         | Z         |
| 1                | 6                | 0              | -1.947986               | -0.034089 | 0.346717  |
| 2                | 6                | 0              | -1.214604               | -0.905418 | -0.681739 |
| 3                | 6                | 0              | -0.052204               | -0.091631 | -1.318376 |
| 4                | 6                | 0              | -0.508269               | 1.261168  | -1.836014 |
| 5                | 6                | 0              | -1.254420               | 2.042702  | -0.781201 |
| 6                | 6                | 0              | -1.987892               | 1.313532  | 0.298807  |
| 7                | 6                | 0              | -2.773085               | 2.183593  | 1.236378  |
| 8                | 8                | 0              | -2.714360               | -0.726556 | 1.279309  |
| 9                | 8                | 0              | -1.309994               | 3.270835  | -0.844082 |
| 10               | 6                | 0              | -2.256121               | -1.329763 | -1.736856 |
| 11               | 8                | 0              | -0.668862               | -2.042806 | 0.016913  |
| 12               | 6                | 0              | -0.303867               | -3.166862 | -0.770481 |
| 13               | 8                | 0              | 0.973861                | 0.164521  | -0.322158 |
| 14               | 6                | 0              | 2.103391                | -0.588816 | -0.371544 |
| 15               | 6                | 0              | 3.003591                | -0.301928 | 0.815477  |
| 16               | 6                | 0              | 3.358280                | 1.186834  | 0.934205  |
| 17               | 6                | 0              | 4.149450                | 1.698931  | -0.261465 |
| 18               | 6                | 0              | 2.335870                | -0.815983 | 2.089207  |
| 19               | 8                | 0              | 2.371662                | -1.404286 | -1.244620 |

|    |   |   |           |           |           |
|----|---|---|-----------|-----------|-----------|
| 20 | 6 | 0 | -1.998686 | -0.931159 | 2.498963  |
| 21 | 1 | 0 | 0.378830  | -0.645229 | -2.159841 |
| 22 | 1 | 0 | 0.368003  | 1.854197  | -2.125625 |
| 23 | 1 | 0 | -1.160720 | 1.157523  | -2.709236 |
| 24 | 1 | 0 | -2.098209 | 2.821019  | 1.816911  |
| 25 | 1 | 0 | -3.377061 | 1.609182  | 1.943469  |
| 26 | 1 | 0 | -3.462940 | 2.825163  | 0.676952  |
| 27 | 1 | 0 | -2.988560 | -2.024874 | -1.307172 |
| 28 | 1 | 0 | -2.805889 | -0.475917 | -2.147283 |
| 29 | 1 | 0 | -1.783470 | -1.847951 | -2.578543 |
| 30 | 1 | 0 | 0.265394  | -2.883554 | -1.658779 |
| 31 | 1 | 0 | 0.317905  | -3.822617 | -0.155508 |
| 32 | 1 | 0 | -1.195479 | -3.728158 | -1.062291 |
| 33 | 1 | 0 | 3.929169  | -0.871908 | 0.662270  |
| 34 | 1 | 0 | 3.958251  | 1.343940  | 1.839315  |
| 35 | 1 | 0 | 2.451939  | 1.794703  | 1.048025  |
| 36 | 1 | 0 | 4.427600  | 2.747046  | -0.107851 |
| 37 | 1 | 0 | 3.564480  | 1.640857  | -1.183948 |
| 38 | 1 | 0 | 5.070332  | 1.122477  | -0.399505 |
| 39 | 1 | 0 | 1.422105  | -0.255994 | 2.318089  |
| 40 | 1 | 0 | 3.011888  | -0.725001 | 2.945992  |
| 41 | 1 | 0 | 2.057909  | -1.870560 | 1.985375  |
| 42 | 1 | 0 | -1.671935 | 0.018711  | 2.935369  |
| 43 | 1 | 0 | -2.680035 | -1.411859 | 3.207988  |
| 44 | 1 | 0 | -1.138658 | -1.591526 | 2.360465  |

-----

9d

Standard orientation:

-----

|        |        |        |                         |
|--------|--------|--------|-------------------------|
| Center | Atomic | Atomic | Coordinates (Angstroms) |
|--------|--------|--------|-------------------------|

| Number | Number | Type | X         | Y         | Z         |
|--------|--------|------|-----------|-----------|-----------|
| -----  |        |      |           |           |           |
| 1      | 6      | 0    | -2.353891 | -0.356448 | -0.403105 |
| 2      | 6      | 0    | -0.971903 | -0.826623 | 0.075244  |
| 3      | 6      | 0    | 0.016737  | 0.363262  | -0.105541 |
| 4      | 6      | 0    | -0.475172 | 1.579094  | 0.664673  |
| 5      | 6      | 0    | -1.850626 | 1.975812  | 0.192529  |
| 6      | 6      | 0    | -2.748185 | 0.933697  | -0.398511 |
| 7      | 6      | 0    | -4.065969 | 1.429677  | -0.912314 |
| 8      | 8      | 0    | -3.187855 | -1.331000 | -0.941384 |
| 9      | 8      | 0    | -2.252115 | 3.132019  | 0.323845  |
| 10     | 6      | 0    | -0.483284 | -2.032845 | -0.750994 |
| 11     | 8      | 0    | -1.198810 | -1.199388 | 1.449814  |
| 12     | 6      | 0    | -0.095124 | -1.668959 | 2.204030  |
| 13     | 8      | 0    | 1.346020  | 0.006012  | 0.339190  |
| 14     | 6      | 0    | 2.377134  | 0.680998  | -0.239155 |
| 15     | 6      | 0    | 3.700564  | 0.191547  | 0.317292  |
| 16     | 6      | 0    | 4.499596  | -0.547077 | -0.762176 |
| 17     | 6      | 0    | 3.837150  | -1.848665 | -1.195643 |
| 18     | 6      | 0    | 4.480213  | 1.387636  | 0.859310  |
| 19     | 8      | 0    | 2.256727  | 1.547344  | -1.093217 |
| 20     | 6      | 0    | -3.891626 | -2.027878 | 0.089122  |
| 21     | 1      | 0    | 0.057361  | 0.598307  | -1.179914 |
| 22     | 1      | 0    | -0.503047 | 1.395595  | 1.743889  |
| 23     | 1      | 0    | 0.204022  | 2.423954  | 0.501431  |
| 24     | 1      | 0    | -4.651163 | 1.871872  | -0.100153 |
| 25     | 1      | 0    | -4.671674 | 0.635304  | -1.359273 |
| 26     | 1      | 0    | -3.911707 | 2.191011  | -1.684607 |
| 27     | 1      | 0    | -1.083236 | -2.927094 | -0.549669 |
| 28     | 1      | 0    | -0.521019 | -1.823089 | -1.826905 |

|    |   |   |           |           |           |
|----|---|---|-----------|-----------|-----------|
| 29 | 1 | 0 | 0.549835  | -2.300060 | -0.509642 |
| 30 | 1 | 0 | 0.570139  | -0.846295 | 2.474531  |
| 31 | 1 | 0 | -0.485410 | -2.087614 | 3.136847  |
| 32 | 1 | 0 | 0.454675  | -2.460085 | 1.689228  |
| 33 | 1 | 0 | 3.506201  | -0.489119 | 1.156717  |
| 34 | 1 | 0 | 5.500852  | -0.780064 | -0.380231 |
| 35 | 1 | 0 | 4.633600  | 0.092243  | -1.643772 |
| 36 | 1 | 0 | 4.471587  | -2.371761 | -1.917941 |
| 37 | 1 | 0 | 2.869930  | -1.665447 | -1.674137 |
| 38 | 1 | 0 | 3.678705  | -2.513312 | -0.339623 |
| 39 | 1 | 0 | 4.730564  | 2.097241  | 0.062096  |
| 40 | 1 | 0 | 5.413743  | 1.063188  | 1.330233  |
| 41 | 1 | 0 | 3.891694  | 1.927616  | 1.609527  |
| 42 | 1 | 0 | -4.409407 | -1.333548 | 0.759846  |
| 43 | 1 | 0 | -4.643544 | -2.661884 | -0.389856 |
| 44 | 1 | 0 | -3.218104 | -2.676226 | 0.656827  |

9e

Standard orientation:

| Center<br>Number | Atomic<br>Number | Atomic<br>Type | Coordinates (Angstroms) |           |           |
|------------------|------------------|----------------|-------------------------|-----------|-----------|
|                  |                  |                | X                       | Y         | Z         |
| 1                | 6                | 0              | -2.126842               | -0.336907 | 0.316225  |
| 2                | 6                | 0              | -1.186984               | -0.976604 | -0.715038 |
| 3                | 6                | 0              | -0.126337               | 0.058974  | -1.179221 |
| 4                | 6                | 0              | -0.745093               | 1.386000  | -1.587577 |
| 5                | 6                | 0              | -1.641636               | 1.933562  | -0.505767 |
| 6                | 6                | 0              | -2.354033               | 0.989239  | 0.410109  |
| 7                | 6                | 0              | -3.332507               | 1.629957  | 1.349075  |

|    |   |   |           |           |           |
|----|---|---|-----------|-----------|-----------|
| 8  | 8 | 0 | -2.866956 | -1.230559 | 1.083982  |
| 9  | 8 | 0 | -1.837929 | 3.145708  | -0.413699 |
| 10 | 6 | 0 | -2.061459 | -1.452486 | -1.891497 |
| 11 | 8 | 0 | -0.536049 | -2.096164 | -0.078038 |
| 12 | 6 | 0 | 0.251353  | -2.943262 | -0.900370 |
| 13 | 8 | 0 | 0.808638  | 0.305061  | -0.095841 |
| 14 | 6 | 0 | 2.106910  | 0.513394  | -0.442055 |
| 15 | 6 | 0 | 2.947835  | 0.744741  | 0.798523  |
| 16 | 6 | 0 | 4.188751  | -0.157645 | 0.796114  |
| 17 | 6 | 0 | 3.837940  | -1.634371 | 0.924295  |
| 18 | 6 | 0 | 3.335995  | 2.219395  | 0.850561  |
| 19 | 8 | 0 | 2.532531  | 0.526226  | -1.588519 |
| 20 | 6 | 0 | -2.245658 | -1.482155 | 2.346384  |
| 21 | 1 | 0 | 0.414052  | -0.355120 | -2.038306 |
| 22 | 1 | 0 | 0.044716  | 2.124684  | -1.765468 |
| 23 | 1 | 0 | -1.337226 | 1.286325  | -2.502922 |
| 24 | 1 | 0 | -2.807465 | 2.266835  | 2.068707  |
| 25 | 1 | 0 | -3.916702 | 0.899571  | 1.917546  |
| 26 | 1 | 0 | -4.048984 | 2.246610  | 0.796028  |
| 27 | 1 | 0 | -2.685307 | -2.305629 | -1.596805 |
| 28 | 1 | 0 | -2.721496 | -0.663313 | -2.267467 |
| 29 | 1 | 0 | -1.446752 | -1.789903 | -2.734012 |
| 30 | 1 | 0 | 1.028963  | -2.388707 | -1.429789 |
| 31 | 1 | 0 | 0.743815  | -3.674640 | -0.251907 |
| 32 | 1 | 0 | -0.373950 | -3.496055 | -1.607102 |
| 33 | 1 | 0 | 2.347143  | 0.512739  | 1.687242  |
| 34 | 1 | 0 | 4.840698  | 0.116667  | 1.633975  |
| 35 | 1 | 0 | 4.771030  | -0.008256 | -0.121884 |
| 36 | 1 | 0 | 4.751598  | -2.235189 | 0.970755  |
| 37 | 1 | 0 | 3.251941  | -1.981545 | 0.067645  |

|    |   |   |           |           |           |
|----|---|---|-----------|-----------|-----------|
| 38 | 1 | 0 | 3.260579  | -1.822692 | 1.835210  |
| 39 | 1 | 0 | 3.952141  | 2.500753  | -0.010697 |
| 40 | 1 | 0 | 3.900236  | 2.443185  | 1.761505  |
| 41 | 1 | 0 | 2.444561  | 2.856222  | 0.839178  |
| 42 | 1 | 0 | -2.110126 | -0.556327 | 2.916092  |
| 43 | 1 | 0 | -2.908836 | -2.137392 | 2.918515  |
| 44 | 1 | 0 | -1.285903 | -1.991976 | 2.232305  |

9f

Standard orientation:

| Center<br>Number | Atomic<br>Number | Atomic<br>Type | Coordinates (Angstroms) |           |           |
|------------------|------------------|----------------|-------------------------|-----------|-----------|
|                  |                  |                | X                       | Y         | Z         |
| 1                | 6                | 0              | -1.994473               | 0.151343  | 0.319467  |
| 2                | 6                | 0              | -1.385336               | -0.952351 | -0.556999 |
| 3                | 6                | 0              | -0.076057               | -0.439804 | -1.218195 |
| 4                | 6                | 0              | -0.254551               | 0.910947  | -1.890736 |
| 5                | 6                | 0              | -0.839274               | 1.925225  | -0.939379 |
| 6                | 6                | 0              | -1.763517               | 1.468989  | 0.143663  |
| 7                | 6                | 0              | -2.413144               | 2.567936  | 0.932242  |
| 8                | 8                | 0              | -2.936382               | -0.277718 | 1.249530  |
| 9                | 8                | 0              | -0.608454               | 3.125022  | -1.088455 |
| 10               | 6                | 0              | -2.440425               | -1.327431 | -1.616057 |
| 11               | 8                | 0              | -1.104851               | -2.081443 | 0.296868  |
| 12               | 6                | 0              | -0.640976               | -3.269250 | -0.325690 |
| 13               | 8                | 0              | 0.950748                | -0.316700 | -0.198502 |
| 14               | 6                | 0              | 2.232953                | -0.541037 | -0.587306 |
| 15               | 6                | 0              | 3.194239                | -0.393307 | 0.576778  |
| 16               | 6                | 0              | 3.036222                | 0.952096  | 1.301191  |

|    |   |   |           |           |           |
|----|---|---|-----------|-----------|-----------|
| 17 | 6 | 0 | 3.351168  | 2.142593  | 0.403624  |
| 18 | 6 | 0 | 2.999622  | -1.564158 | 1.538048  |
| 19 | 8 | 0 | 2.576050  | -0.843511 | -1.721544 |
| 20 | 6 | 0 | -2.351253 | -0.473258 | 2.538995  |
| 21 | 1 | 0 | 0.248822  | -1.169464 | -1.969511 |
| 22 | 1 | 0 | 0.717719  | 1.294349  | -2.222010 |
| 23 | 1 | 0 | -0.912189 | 0.841896  | -2.763629 |
| 24 | 1 | 0 | -1.660921 | 3.112039  | 1.513485  |
| 25 | 1 | 0 | -3.170034 | 2.200356  | 1.630104  |
| 26 | 1 | 0 | -2.914739 | 3.275758  | 0.264406  |
| 27 | 1 | 0 | -3.284737 | -1.856249 | -1.156819 |
| 28 | 1 | 0 | -2.834237 | -0.451547 | -2.142061 |
| 29 | 1 | 0 | -2.022399 | -2.000460 | -2.373521 |
| 30 | 1 | 0 | -0.431964 | -3.998646 | 0.462564  |
| 31 | 1 | 0 | -1.403648 | -3.697517 | -0.979855 |
| 32 | 1 | 0 | 0.287460  | -3.101790 | -0.877021 |
| 33 | 1 | 0 | 4.209277  | -0.451681 | 0.164748  |
| 34 | 1 | 0 | 3.714987  | 0.980056  | 2.162200  |
| 35 | 1 | 0 | 2.020045  | 1.065056  | 1.697314  |
| 36 | 1 | 0 | 3.279810  | 3.072089  | 0.975438  |
| 37 | 1 | 0 | 2.649554  | 2.209142  | -0.432996 |
| 38 | 1 | 0 | 4.365778  | 2.070470  | -0.000674 |
| 39 | 1 | 0 | 2.008330  | -1.541206 | 2.004543  |
| 40 | 1 | 0 | 3.750506  | -1.540924 | 2.335934  |
| 41 | 1 | 0 | 3.093615  | -2.520630 | 1.011731  |
| 42 | 1 | 0 | -1.616111 | -1.282248 | 2.533722  |
| 43 | 1 | 0 | -1.889783 | 0.446713  | 2.911926  |
| 44 | 1 | 0 | -3.153222 | -0.751962 | 3.228919  |

Standard orientation:

| -----  |        |        |                         |           |           |
|--------|--------|--------|-------------------------|-----------|-----------|
| Center | Atomic | Atomic | Coordinates (Angstroms) |           |           |
| Number | Number | Type   | X                       | Y         | Z         |
| -----  |        |        |                         |           |           |
| 1      | 6      | 0      | -2.396953               | -0.274538 | -0.297766 |
| 2      | 6      | 0      | -0.998682               | -0.868128 | -0.070424 |
| 3      | 6      | 0      | 0.042673                | 0.246046  | -0.388155 |
| 4      | 6      | 0      | -0.211367               | 1.469087  | 0.479711  |
| 5      | 6      | 0      | -1.609639               | 1.988536  | 0.256515  |
| 6      | 6      | 0      | -2.675658               | 1.041754  | -0.197405 |
| 7      | 6      | 0      | -4.015737               | 1.657323  | -0.470184 |
| 8      | 8      | 0      | -3.386117               | -1.161095 | -0.708704 |
| 9      | 8      | 0      | -1.885038               | 3.166545  | 0.480278  |
| 10     | 6      | 0      | -0.755720               | -2.077381 | -0.995151 |
| 11     | 8      | 0      | -1.024781               | -1.274259 | 1.312274  |
| 12     | 6      | 0      | 0.151301                | -1.843569 | 1.862497  |
| 13     | 8      | 0      | 1.392117                | -0.227925 | -0.180207 |
| 14     | 6      | 0      | 2.364568                | 0.372399  | -0.918326 |
| 15     | 6      | 0      | 3.732859                | -0.198685 | -0.599208 |
| 16     | 6      | 0      | 4.113045                | 0.006204  | 0.872913  |
| 17     | 6      | 0      | 4.224517                | 1.477510  | 1.251176  |
| 18     | 6      | 0      | 3.775646                | -1.677953 | -0.981353 |
| 19     | 8      | 0      | 2.172717                | 1.262091  | -1.735435 |
| 20     | 6      | 0      | -3.963678               | -1.838917 | 0.409916  |
| 21     | 1      | 0      | -0.077529               | 0.515530  | -1.449424 |
| 22     | 1      | 0      | -0.072980               | 1.251122  | 1.543810  |
| 23     | 1      | 0      | 0.498328                | 2.262962  | 0.220966  |
| 24     | 1      | 0      | -4.418411               | 2.114409  | 0.440746  |
| 25     | 1      | 0      | -4.751450               | 0.929101  | -0.824366 |

|    |   |   |           |           |           |
|----|---|---|-----------|-----------|-----------|
| 26 | 1 | 0 | -3.928685 | 2.431857  | -1.239187 |
| 27 | 1 | 0 | -1.380699 | -2.931762 | -0.712484 |
| 28 | 1 | 0 | -0.960524 | -1.828419 | -2.043066 |
| 29 | 1 | 0 | 0.280077  | -2.429739 | -0.942995 |
| 30 | 1 | 0 | 0.560368  | -2.640626 | 1.237469  |
| 31 | 1 | 0 | 0.902809  | -1.074314 | 2.052256  |
| 32 | 1 | 0 | -0.113392 | -2.281303 | 2.829576  |
| 33 | 1 | 0 | 4.457506  | 0.332079  | -1.229885 |
| 34 | 1 | 0 | 5.079279  | -0.474154 | 1.067342  |
| 35 | 1 | 0 | 3.381599  | -0.475438 | 1.533235  |
| 36 | 1 | 0 | 4.552061  | 1.574668  | 2.290571  |
| 37 | 1 | 0 | 3.261157  | 1.989019  | 1.156001  |
| 38 | 1 | 0 | 4.952892  | 1.992197  | 0.616419  |
| 39 | 1 | 0 | 3.107516  | -2.276169 | -0.350890 |
| 40 | 1 | 0 | 4.788736  | -2.077151 | -0.872239 |
| 41 | 1 | 0 | 3.463786  | -1.820674 | -2.021733 |
| 42 | 1 | 0 | -4.300539 | -1.132314 | 1.175988  |
| 43 | 1 | 0 | -4.835321 | -2.392571 | 0.049787  |
| 44 | 1 | 0 | -3.260817 | -2.559309 | 0.837919  |

**Table S15** Gibbs free energies and Boltzmann-population of low-energy conformers of 2*S*, 3*R*, 4*R* -**10**.

| Conformers of Compound | In MeOH      |                   |
|------------------------|--------------|-------------------|
|                        | $\Delta G^a$ | P(%) <sup>b</sup> |
| <b>10a</b>             | 0.00         | 100.00%           |
| <b>10b</b>             | 7.03         | 0.00%             |

**Table S16** Cartesian coordinates for the low-energy optimized conformers of 2*S*, 3*R*, 4*R* -**10** at B3LYP/6-31+G (d, p) level of theory in MeOH.

10a

Standard orientation:

| -----  |        |        |                         |           |           |
|--------|--------|--------|-------------------------|-----------|-----------|
| Center | Atomic | Atomic | Coordinates (Angstroms) |           |           |
| Number | Number | Type   | X                       | Y         | Z         |
| -----  |        |        |                         |           |           |
| 1      | 6      | 0      | 0.873235                | 1.017720  | -0.363246 |
| 2      | 6      | 0      | 1.525659                | -0.286797 | 0.114455  |
| 3      | 6      | 0      | 0.627705                | -1.448628 | -0.302024 |
| 4      | 6      | 0      | -0.840564               | -1.283150 | -0.190930 |
| 5      | 6      | 0      | -1.388778               | -0.081789 | 0.065933  |
| 6      | 6      | 0      | -0.560142               | 1.197150  | 0.178499  |
| 7      | 6      | 0      | -1.229379               | 2.378832  | -0.544199 |
| 8      | 8      | 0      | 1.689332                | 2.134484  | 0.020089  |
| 9      | 6      | 0      | 1.784930                | -0.347535 | 1.620567  |
| 10     | 8      | 0      | 2.803914                | -0.392325 | -0.535662 |
| 11     | 8      | 0      | 1.093008                | -2.524005 | -0.680718 |
| 12     | 8      | 0      | -2.738872               | 0.138284  | 0.260757  |
| 13     | 6      | 0      | -3.634446               | -0.964895 | 0.173758  |
| 14     | 1      | 0      | 0.852608                | 1.022995  | -1.462638 |
| 15     | 1      | 0      | -1.406059               | -2.198829 | -0.303008 |
| 16     | 1      | 0      | -0.507768               | 1.470831  | 1.240647  |
| 17     | 1      | 0      | -1.374690               | 2.162749  | -1.608828 |
| 18     | 1      | 0      | -2.209598               | 2.607182  | -0.110430 |
| 19     | 1      | 0      | -0.623467               | 3.286815  | -0.462160 |
| 20     | 1      | 0      | 2.597522                | 1.894587  | -0.254293 |
| 21     | 1      | 0      | 2.277478                | -1.290869 | 1.885628  |
| 22     | 1      | 0      | 0.863997                | -0.282532 | 2.207085  |
| 23     | 1      | 0      | 2.461111                | 0.453238  | 1.939511  |
| 24     | 1      | 0      | 3.005886                | -1.350063 | -0.573962 |
| 25     | 1      | 0      | -3.611244               | -1.408609 | -0.826433 |

|    |   |   |           |           |          |
|----|---|---|-----------|-----------|----------|
| 26 | 1 | 0 | -3.407909 | -1.713264 | 0.940863 |
| 27 | 1 | 0 | -4.646262 | -0.591185 | 0.355421 |

-----

10b

Standard orientation:

-----

| Center | Atomic | Atomic | Coordinates (Angstroms) |           |           |
|--------|--------|--------|-------------------------|-----------|-----------|
| Number | Number | Type   | X                       | Y         | Z         |
| -----  |        |        |                         |           |           |
| 1      | 6      | 0      | 0.646564                | 1.100206  | -0.354452 |
| 2      | 6      | 0      | 1.518870                | -0.045216 | 0.186757  |
| 3      | 6      | 0      | 0.983045                | -1.363925 | -0.371021 |
| 4      | 6      | 0      | -0.482203               | -1.540949 | -0.465957 |
| 5      | 6      | 0      | -1.310150               | -0.511165 | -0.245739 |
| 6      | 6      | 0      | -0.850964               | 0.922069  | -0.019106 |
| 7      | 6      | 0      | -1.675354               | 1.927095  | -0.838972 |
| 8      | 8      | 0      | 1.116991                | 2.352140  | 0.165761  |
| 9      | 6      | 0      | 1.580610                | -0.118839 | 1.713574  |
| 10     | 8      | 0      | 2.860285                | 0.180131  | -0.274767 |
| 11     | 8      | 0      | 1.736147                | -2.282326 | -0.694390 |
| 12     | 8      | 0      | -2.676964               | -0.731458 | -0.325558 |
| 13     | 6      | 0      | -3.296873               | -0.662498 | 0.959005  |
| 14     | 1      | 0      | 0.774652                | 1.158287  | -1.443801 |
| 15     | 1      | 0      | -0.842042               | -2.537327 | -0.693768 |
| 16     | 1      | 0      | -1.005124               | 1.171329  | 1.039530  |
| 17     | 1      | 0      | -1.602103               | 1.718495  | -1.912455 |
| 18     | 1      | 0      | -2.734839               | 1.895971  | -0.563447 |
| 19     | 1      | 0      | -1.328740               | 2.951749  | -0.668559 |
| 20     | 1      | 0      | 2.084383                | 2.345088  | 0.014100  |
| 21     | 1      | 0      | 2.237589                | -0.938001 | 2.030874  |

|    |   |   |           |           |           |
|----|---|---|-----------|-----------|-----------|
| 22 | 1 | 0 | 0.598912  | -0.293073 | 2.165248  |
| 23 | 1 | 0 | 2.003692  | 0.797179  | 2.138435  |
| 24 | 1 | 0 | 3.280255  | -0.703956 | -0.317235 |
| 25 | 1 | 0 | -2.826791 | -1.360989 | 1.659696  |
| 26 | 1 | 0 | -3.266393 | 0.355785  | 1.358223  |
| 27 | 1 | 0 | -4.346396 | -0.949102 | 0.840257  |

**Table S17** Gibbs free energies and Boltzmann-population of low-energy conformers of 2*R*, 3*R*, 4*R* -**11**.

| Conformers of Compound | In MeOH      |                   |
|------------------------|--------------|-------------------|
|                        | $\Delta G^a$ | P(%) <sup>b</sup> |
| <b>11a</b>             | 0.00         | 99.97%            |
| <b>11b</b>             | 4.83         | 0.03%             |

**Table S18** Cartesian coordinates for the low-energy optimized conformers of 7*S*, 10*R*, 11*R*, 13*E*, 14*R*, 16*S* -**1** at B3LYP/6-31+G (d, p) level of theory in MeOH.

11a

Standard orientation:

| Center | Atomic | Atomic | Coordinates (Angstroms) |           |           |
|--------|--------|--------|-------------------------|-----------|-----------|
| Number | Number | Type   | X                       | Y         | Z         |
| 1      | 6      | 0      | 0.850417                | -1.119659 | 0.544929  |
| 2      | 6      | 0      | 1.544081                | 0.013486  | -0.226862 |
| 3      | 6      | 0      | 0.728965                | 1.300971  | -0.115221 |
| 4      | 6      | 0      | -0.747711               | 1.218872  | -0.063445 |
| 5      | 6      | 0      | -1.383430               | 0.043333  | 0.079491  |
| 6      | 6      | 0      | -0.655685               | -1.281944 | 0.255458  |
| 7      | 6      | 0      | -0.918973               | -2.205076 | -0.938586 |
| 8      | 8      | 0      | 1.016859                | -0.869662 | 1.957373  |

|    |   |   |           |           |           |
|----|---|---|-----------|-----------|-----------|
| 9  | 6 | 0 | 1.788456  | -0.292099 | -1.701695 |
| 10 | 8 | 0 | 2.835332  | 0.221090  | 0.383960  |
| 11 | 8 | 0 | 1.276649  | 2.405513  | -0.122135 |
| 12 | 8 | 0 | -2.757012 | -0.110514 | 0.130237  |
| 13 | 6 | 0 | -3.576698 | 1.051970  | 0.072281  |
| 14 | 1 | 0 | 1.375402  | -2.066437 | 0.368773  |
| 15 | 1 | 0 | -1.251487 | 2.172393  | -0.146887 |
| 16 | 1 | 0 | -1.098798 | -1.769178 | 1.136407  |
| 17 | 1 | 0 | -0.362652 | -3.143195 | -0.837770 |
| 18 | 1 | 0 | -0.647561 | -1.747770 | -1.893269 |
| 19 | 1 | 0 | -1.982926 | -2.466114 | -0.998137 |
| 20 | 1 | 0 | 1.954718  | -0.601427 | 2.057831  |
| 21 | 1 | 0 | 2.477423  | 0.441540  | -2.138037 |
| 22 | 1 | 0 | 0.872189  | -0.262932 | -2.296521 |
| 23 | 1 | 0 | 2.261160  | -1.273007 | -1.825431 |
| 24 | 1 | 0 | 3.087260  | 1.142064  | 0.160726  |
| 25 | 1 | 0 | -3.369756 | 1.717895  | 0.916852  |
| 26 | 1 | 0 | -3.446098 | 1.574190  | -0.880614 |
| 27 | 1 | 0 | -4.620025 | 0.731443  | 0.142490  |

-----

11b

Standard orientation:

| Center<br>Number | Atomic<br>Number | Atomic<br>Type | Coordinates (Angstroms) |           |           |
|------------------|------------------|----------------|-------------------------|-----------|-----------|
|                  |                  |                | X                       | Y         | Z         |
| 1                | 6                | 0              | 0.532423                | -1.103443 | 0.607057  |
| 2                | 6                | 0              | 1.548704                | -0.193787 | -0.105521 |
| 3                | 6                | 0              | 1.012165                | 1.235094  | -0.198327 |
| 4                | 6                | 0              | -0.437685               | 1.441530  | -0.391565 |

|    |   |   |           |           |           |
|----|---|---|-----------|-----------|-----------|
| 5  | 6 | 0 | -1.306873 | 0.432680  | -0.253376 |
| 6  | 6 | 0 | -0.923430 | -0.991358 | 0.107877  |
| 7  | 6 | 0 | -1.212776 | -1.938743 | -1.059773 |
| 8  | 8 | 0 | 0.545824  | -0.777202 | 2.014587  |
| 9  | 6 | 0 | 1.932752  | -0.668821 | -1.504984 |
| 10 | 8 | 0 | 2.752075  | -0.191822 | 0.689421  |
| 11 | 8 | 0 | 1.770491  | 2.205744  | -0.167139 |
| 12 | 8 | 0 | -2.646258 | 0.676737  | -0.520227 |
| 13 | 6 | 0 | -3.453348 | 0.604395  | 0.655850  |
| 14 | 1 | 0 | 0.870190  | -2.146136 | 0.561486  |
| 15 | 1 | 0 | -0.755512 | 2.444318  | -0.651186 |
| 16 | 1 | 0 | -1.561947 | -1.311604 | 0.941060  |
| 17 | 1 | 0 | -0.893112 | -2.959322 | -0.822870 |
| 18 | 1 | 0 | -0.715732 | -1.633082 | -1.983299 |
| 19 | 1 | 0 | -2.288340 | -1.977025 | -1.269418 |
| 20 | 1 | 0 | 1.495846  | -0.679705 | 2.240162  |
| 21 | 1 | 0 | 2.806982  | -0.117633 | -1.871212 |
| 22 | 1 | 0 | 1.132846  | -0.524286 | -2.235271 |
| 23 | 1 | 0 | 2.217700  | -1.727267 | -1.494512 |
| 24 | 1 | 0 | 3.218391  | 0.639205  | 0.457277  |
| 25 | 1 | 0 | -3.629859 | -0.437733 | 0.940288  |
| 26 | 1 | 0 | -3.004438 | 1.159287  | 1.486054  |
| 27 | 1 | 0 | -4.421660 | 1.058040  | 0.424870  |

-----

**Table S19** Gibbs free energies and Boltzmann-population of low-energy conformers of 2*R*, 3*R*, 4*R* -**12**.

| Conformers of Compound | In MeOH      |                   |
|------------------------|--------------|-------------------|
|                        | $\Delta G^a$ | P(%) <sup>b</sup> |
| <b>12a</b>             | 0.00         | 100.00%           |

|            |      |       |
|------------|------|-------|
| <b>12b</b> | 7.57 | 0.00% |
|------------|------|-------|

**Table S20** Cartesian coordinates for the low-energy optimized conformers of 2*R*, 3*R*, 4*R* -**12** at B3LYP/6-31+G (d, p) level of theory in MeOH.

12a

Standard orientation:

| -----  |        |        |                         |           |           |
|--------|--------|--------|-------------------------|-----------|-----------|
| Center | Atomic | Atomic | Coordinates (Angstroms) |           |           |
| Number | Number | Type   | X                       | Y         | Z         |
| -----  |        |        |                         |           |           |
| 1      | 6      | 0      | 0.803820                | 1.233540  | 0.021317  |
| 2      | 6      | 0      | 1.600219                | -0.046156 | 0.303609  |
| 3      | 6      | 0      | 0.858439                | -1.246966 | -0.283370 |
| 4      | 6      | 0      | -0.621146               | -1.263987 | -0.249413 |
| 5      | 6      | 0      | -1.324790               | -0.185810 | 0.139667  |
| 6      | 6      | 0      | -0.664943               | 1.145138  | 0.493302  |
| 7      | 6      | 0      | -1.465121               | 2.344577  | -0.036899 |
| 8      | 8      | 0      | 0.874621                | 1.522705  | -1.385441 |
| 9      | 6      | 0      | 1.847323                | -0.281943 | 1.793109  |
| 10     | 8      | 0      | 2.881626                | 0.079935  | -0.339076 |
| 11     | 8      | 0      | 1.468477                | -2.220845 | -0.730014 |
| 12     | 8      | 0      | -2.700807               | -0.154044 | 0.277013  |
| 13     | 6      | 0      | -3.452190               | -1.302903 | -0.098686 |
| 14     | 1      | 0      | 1.290072                | 2.084626  | 0.514673  |
| 15     | 1      | 0      | -1.065039               | -2.209970 | -0.529299 |
| 16     | 1      | 0      | -0.670157               | 1.210564  | 1.589988  |
| 17     | 1      | 0      | -1.626735               | 2.279076  | -1.118171 |
| 18     | 1      | 0      | -2.448322               | 2.405462  | 0.443016  |
| 19     | 1      | 0      | -0.943394               | 3.283605  | 0.175999  |
| 20     | 1      | 0      | 1.818309                | 1.404083  | -1.623580 |

|    |   |   |           |           |           |
|----|---|---|-----------|-----------|-----------|
| 21 | 1 | 0 | 2.479338  | -1.165733 | 1.944152  |
| 22 | 1 | 0 | 0.919914  | -0.439082 | 2.352707  |
| 23 | 1 | 0 | 2.384008  | 0.564173  | 2.235545  |
| 24 | 1 | 0 | 3.193476  | -0.837346 | -0.488189 |
| 25 | 1 | 0 | -3.304177 | -1.538409 | -1.157881 |
| 26 | 1 | 0 | -3.197207 | -2.159637 | 0.533301  |
| 27 | 1 | 0 | -4.511087 | -1.076366 | 0.052068  |

-----

12b

Standard orientation:

-----

| Center | Atomic | Atomic | Coordinates (Angstroms) |           |           |
|--------|--------|--------|-------------------------|-----------|-----------|
| Number | Number | Type   | X                       | Y         | Z         |
| -----  |        |        |                         |           |           |
| 1      | 6      | 0      | 0.608533                | 1.237475  | 0.207032  |
| 2      | 6      | 0      | 1.524353                | 0.024246  | 0.426698  |
| 3      | 6      | 0      | 1.079621                | -1.130064 | -0.476377 |
| 4      | 6      | 0      | -0.364093               | -1.318311 | -0.728001 |
| 5      | 6      | 0      | -1.259317               | -0.421771 | -0.293645 |
| 6      | 6      | 0      | -0.893999               | 0.900915  | 0.366095  |
| 7      | 6      | 0      | -1.760942               | 2.059353  | -0.145485 |
| 8      | 8      | 0      | 0.876714                | 1.792556  | -1.092669 |
| 9      | 6      | 0      | 1.547025                | -0.449736 | 1.878032  |
| 10     | 8      | 0      | 2.864637                | 0.413363  | 0.072201  |
| 11     | 8      | 0      | 1.894948                | -1.927306 | -0.942519 |
| 12     | 8      | 0      | -2.604507               | -0.656179 | -0.531159 |
| 13     | 6      | 0      | -3.288789               | -1.047205 | 0.658765  |
| 14     | 1      | 0      | 0.873750                | 2.030636  | 0.916384  |
| 15     | 1      | 0      | -0.654415               | -2.219292 | -1.254331 |
| 16     | 1      | 0      | -1.094011               | 0.785994  | 1.439491  |

|    |   |   |           |           |           |
|----|---|---|-----------|-----------|-----------|
| 17 | 1 | 0 | -1.707980 | 2.155543  | -1.236503 |
| 18 | 1 | 0 | -2.812971 | 1.915991  | 0.123260  |
| 19 | 1 | 0 | -1.438688 | 3.008127  | 0.297144  |
| 20 | 1 | 0 | 1.853563  | 1.816788  | -1.165033 |
| 21 | 1 | 0 | 2.263225  | -1.269809 | 2.005417  |
| 22 | 1 | 0 | 0.570052  | -0.808064 | 2.217801  |
| 23 | 1 | 0 | 1.874780  | 0.355093  | 2.545291  |
| 24 | 1 | 0 | 3.324942  | -0.417147 | -0.171210 |
| 25 | 1 | 0 | -2.826951 | -1.936764 | 1.100782  |
| 26 | 1 | 0 | -3.314294 | -0.230943 | 1.387296  |
| 27 | 1 | 0 | -4.319684 | -1.295017 | 0.388681  |

-----
